# Supplementary material for: Unraveling the Developmental and Genetic Mechanisms Underpinning Floral Architecture in Proteaceae
Source: Front Plant Sci. 2019 Jan 25;10:18. doi: 10.3389/fpls.2019.00018 (PMC6357683; doi:10.3389/fpls.2019.00018)
Supplement: Supplementary file 3 [file Table_3.XLSX]

## Sheet: Arabidopsis r>= 0.5 ID list
AGI ID list of floral genes co-expressed with ABCE MADS-box genes in Arabidopsis thaliana with a Pearson Correlation Coefficient (r-value) cut-off fixed at 0.5
Occurrence frequency	AGI-ID	Best r-value to Bait	GeneChip-ID	Annotation (1225 hits found)
7	At1g24260	1	264872_at	AGL9_SEP3__K-box region and MADS-box transcription factor family protein
6	At3g02310	1	259124_at	AGL4_SEP2__K-box region and MADS-box transcription factor family protein
6	At3g54340	1	251898_at	AP3_ATAP3__K-box region and MADS-box transcription factor family protein
6	At4g18960	1	254595_at	AG__K-box region and MADS-box transcription factor family protein
6	At5g15800	1	246531_at	AGL2_SEP1__K-box region and MADS-box transcription factor family protein
6	At5g20240	1	246072_at	PI__K-box region and MADS-box transcription factor family protein
5	At1g69120	1	259372_at	AGL7_AP1_AtAP1__K-box region and MADS-box transcription factor family protein
6	At1g78960	0.849	264137_at	ATLUP2_LUP2__lupeol synthase 2
4	At1g59640	0.843	262073_at	BPE_BPEp_BPEub_ZCW32__BIG PETAL P
6	At4g01080	0.83	255604_at	TBL26__TRICHOME BIREFRINGENCE-LIKE 26
7	At1g02190	0.823	264180_at	Fatty acid hydroxylase superfamily
6	At3g03450	0.823	259042_at	RGL2__RGA-like 2
6	At3g10570	0.808	258962_at	CYP77A6__cytochrome P450, family 77, subfamily A, polypeptide 6
7	At1g05490	0.804	263204_at	chr31__chromatin remodeling 31
6	At1g16705	0.797	255768_at	p300/CBP acetyltransferase-related protein-related
7	At3g04960	0.795	259089_at	Domain of unknown function (DUF3444)
6	At2g38110	0.789	267144_at	ATGPAT6_GPAT6__glycerol-3-phosphate acyltransferase 6
4	At5g02190	0.788	251025_at	ATASP38_EMB24_PCS1__Eukaryotic aspartyl protease family protein
6	At1g66350	0.787	260141_at	RGL_RGL1__RGA-like 1
4	At3g01980	0.779	258976_at	NAD(P)-binding Rossmann-fold superfamily protein
5	At4g21590	0.777	254391_at	ENDO3__endonuclease 3
5	At1g27360	0.776	264444_at	SPL11__squamosa promoter-like 11
6	At4g14695	0.77	245571_at	Uncharacterised protein family (UPF0041)
5	At3g28500	0.769	256597_at	60S acidic ribosomal protein family
7	At5g48880	0.768	248625_at	KAT5_PKT1_PKT2__peroxisomal 3-keto-acyl-CoA thiolase 2
6	At1g35170	0.764	245783_s_at	TRAM, LAG1 and CLN8 (TLC) lipid-sensing domain containing protein
4	At5g59120	0.763	247758_at	ATSBT4.13_SBT4.13__subtilase 4.13
6	At5g35670	0.762	249709_at	iqd33__IQ-domain 33
6	At5g33370	0.756	246687_at	GDSL-like Lipase/Acylhydrolase superfamily protein
5	At2g20870	0.755	265441_at	cell wall protein precursor, putative
4	At2g42830	0.753	263988_at	AGL5_SHP2__K-box region and MADS-box transcription factor family protein
4	At1g72260	0.751	259802_at	THI2.1_THI2.1.1__thionin 2.1
5	At5g22430	0.75	249939_at	Pollen Ole e 1 allergen and extensin family protein
4	At4g09960	0.75	255014_at	AGL11_STK__K-box region and MADS-box transcription factor family protein
5	At1g58430	0.749	245842_at	RXF26__GDSL-like Lipase/Acylhydrolase family protein
3	At4g16590	0.749	245465_at	ATCSLA01_ATCSLA1_CSLA01__cellulose synthase-like A01
5	At5g23970	0.747	249761_at	HXXXD-type acyl-transferase family protein
5	At5g40350	0.747	249349_at	AtMYB24_MYB24__myb domain protein 24
4	At5g42230	0.747	249241_at	scpl41__serine carboxypeptidase-like 41
6	At4g19430	0.745	254574_at
6	At2g19170	0.742	267465_at	SLP3__subtilisin-like serine protease 3
6	At1g75300	0.741	256509_at	NmrA-like negative transcriptional regulator family protein
6	At1g75090	0.738	259926_at	DNA glycosylase superfamily protein
4	At2g28470	0.735	264078_at	BGAL8__beta-galactosidase 8
2	At1g61680	0.734	264430_at	ATTPS14_TPS14__terpene synthase 14
7	At5g23940	0.733	249813_at	DCR_EMB3009_PEL3__HXXXD-type acyl-transferase family protein
4	At5g60140	0.733	247666_at	AP2/B3-like transcriptional factor family protein
2	At4g12410	0.733	254809_at	SAUR35__SAUR-like auxin-responsive protein family
4	At3g14395	0.729	258370_at
4	At5g18000	0.727	250071_at	VDD__VERDANDI
4	At4g12960	0.724	254777_at	AtGILT_GILT__Gamma interferon responsive lysosomal thiol (GILT) reductase family protein
4	At4g15440	0.723	245253_at	CYP74B2_HPL1__hydroperoxide lyase 1
3	At4g13790	0.723	254685_at	SAUR25__SAUR-like auxin-responsive protein family
4	At4g32460	0.722	253437_at	Protein of unknown function, DUF642
7	At4g20320	0.72	254490_at	CTP synthase family protein
6	At1g21460	0.719	260876_at	AtSWEET1_SWEET1__Nodulin MtN3 family protein
4	At3g46770	0.719	252495_at	AP2/B3-like transcriptional factor family protein
6	At2g42900	0.717	265265_at	Plant basic secretory protein (BSP) family protein
5	At5g20740	0.717	246002_at	Plant invertase/pectin methylesterase inhibitor superfamily protein
3	At4g12890	0.717	254786_at	Gamma interferon responsive lysosomal thiol (GILT) reductase family protein
6	At4g00870	0.716	255644_at	basic helix-loop-helix (bHLH) DNA-binding superfamily protein
2	At2g24210	0.716	265984_at	TPS10__terpene synthase 10
5	At5g45960	0.712	248924_at	GDSL-like Lipase/Acylhydrolase superfamily protein
3	At1g24540	0.712	265020_at	CYP86C1__cytochrome P450, family 86, subfamily C, polypeptide 1
2	At3g15270	0.712	257051_at	SPL5__squamosa promoter binding protein-like 5
7	At1g24070	0.711	263031_at	ATCSLA10_CSLA10__cellulose synthase-like A10
2	At1g22380	0.709	261923_at	AtUGT85A3_UGT85A3__UDP-glucosyl transferase 85A3
2	At3g06220	0.709	256389_at	AP2/B3-like transcriptional factor family protein
4	At5g21150	0.708	246025_at	AGO9__Argonaute family protein
4	At2g27920	0.707	264071_at	SCPL51__serine carboxypeptidase-like 51
6	At3g20820	0.705	257974_at	Leucine-rich repeat (LRR) family protein
5	At2g42200	0.703	267639_at	AtSPL9_SPL9__squamosa promoter binding protein-like 9
3	At1g70720	0.703	260178_at	Plant invertase/pectin methylesterase inhibitor superfamily protein
3	At5g09730	0.7	250499_at	ATBX3_ATBXL3_BX3_BXL3_XYL3__beta-xylosidase 3
2	At4g30130	0.698	253661_at	Protein of unknown function (DUF630 and DUF632)
6	At1g55260	0.697	259660_at	LTPG6__Bifunctional inhibitor/lipid-transfer protein/seed storage 2S albumin superfamily protein
4	At3g11480	0.697	259286_at	ATBSMT1_BSMT1__S-adenosyl-L-methionine-dependent methyltransferases superfamily protein
3	At1g12080	0.697	264342_at	Vacuolar calcium-binding protein-related
3	At1g15260	0.697	262598_at
7	At2g45650	0.696	267528_at	AGL6_RSB1__AGAMOUS-like 6
3	At5g15310	0.696	250167_at	ATMIXTA_ATMYB16_MYB16__myb domain protein 16
4	At2g22960	0.694	267253_at	alpha/beta-Hydrolases superfamily protein
4	At2g42990	0.694	265261_at	GDSL-like Lipase/Acylhydrolase superfamily protein
2	At4g29030	0.694	253753_at	Putative membrane lipoprotein
5	At5g07990	0.692	250558_at	CYP75B1_D501_TT7__Cytochrome P450 superfamily protein
3	At1g35310	0.692	259574_at	MLP168__MLP-like protein 168
3	At4g23680	0.692	254234_at	Polyketide cyclase/dehydrase and lipid transport superfamily protein
6	At3g22840	0.691	258321_at	ELIP_ELIP1__Chlorophyll A-B binding family protein
6	At3g27810	0.69	257220_at	ATMYB21_ATMYB3_MYB21__myb domain protein 21
5	At3g55290	0.69	251780_s_at	SDRd__NAD(P)-binding Rossmann-fold superfamily protein
1	At4g24670	0.69	254125_at	TAR2__tryptophan aminotransferase related 2
3	At3g56370	0.689	251714_at	Leucine-rich repeat protein kinase family protein
3	At4g21480	0.689	254418_at	STP12__sugar transporter protein 12
4	At3g60160	0.688	251457_s_at	ABCC9_ATMRP9_MRP9__multidrug resistance-associated protein 9
4	At5g11550	0.688	250376_at	ARM repeat superfamily protein
5	At1g27370	0.687	264489_at	SPL10__squamosa promoter binding protein-like 10
3	At1g23060	0.687	264902_at	MDP40__
2	At2g45580	0.686	267560_at	CYP76C3__cytochrome P450, family 76, subfamily C, polypeptide 3
7	At5g37020	0.685	249651_at	ARF8_ATARF8__auxin response factor 8
2	At1g64450	0.685	262002_at	Glycine-rich protein family
4	At1g72290	0.682	259799_at	Kunitz family trypsin and protease inhibitor protein
2	At5g45950	0.682	248921_at	GDSL-like Lipase/Acylhydrolase superfamily protein
5	At5g24580	0.681	249755_at	Heavy metal transport/detoxification superfamily protein
4	At3g53130	0.681	251979_at	CYP97C1_LUT1__Cytochrome P450 superfamily protein
1	At3g57920	0.681	251560_at	SPL15__squamosa promoter binding protein-like 15
6	At3g28007	0.678	257271_at	AtSWEET4_SWEET4__Nodulin MtN3 family protein
2	At3g61310	0.678	251365_at	AHL11__AT hook motif DNA-binding family protein
4	At3g20520	0.677	257089_at	GDPDL5_SVL3__SHV3-like 3
3	At1g63710	0.676	260241_at	CYP86A7__cytochrome P450, family 86, subfamily A, polypeptide 7
5	At2g32765	0.675	267555_at	ATSUMO5_SUM5_SUMO5__small ubiquitinrelated modifier 5
2	At2g17880	0.675	264788_at	DJC24__Chaperone DnaJ-domain superfamily protein
5	At5g08000	0.672	250565_at	E13L3_PDCB2__glucan endo-1,3-beta-glucosidase-like protein 3
3	At5g08640	0.672	250533_at	ATFLS1_FLS_FLS1__flavonol synthase 1
1	At1g14440	0.672	261502_at	AtHB31_FTM2_HB31_ZHD4__homeobox protein 31
5	At2g33810	0.671	267460_at	SPL3__squamosa promoter binding protein-like 3
4	At5g24420	0.67	249732_at	PGL5__6-phosphogluconolactonase 5
4	At1g77610	0.669	259713_at	EamA-like transporter family protein
2	At5g48900	0.669	248681_at	Pectin lyase-like superfamily protein
4	At5g39220	0.667	249497_at	alpha/beta-Hydrolases superfamily protein
2	At5g53190	0.667	248245_at	AtSWEET3_SWEET3__Nodulin MtN3 family protein
1	At3g02640	0.667	258480_at
7	At1g48480	0.666	261308_at	RKL1__receptor-like kinase 1
5	At1g72970	0.666	262376_at	EDA17_HTH__Glucose-methanol-choline (GMC) oxidoreductase family protein
2	At3g55870	0.665	251716_at	ADC synthase superfamily protein
4	At5g55720	0.663	248073_at	Pectin lyase-like superfamily protein
6	At1g13280	0.662	259366_at	AOC4__allene oxide cyclase 4
4	At2g01610	0.662	266352_at	Plant invertase/pectin methylesterase inhibitor superfamily protein
2	At4g03210	0.662	255433_at	XTH9__xyloglucan endotransglucosylase/hydrolase 9
4	At3g51895	0.661	246310_at	AST12_SULTR3;1__sulfate transporter 3;1
3	At3g08770	0.661	258675_at	LTP6__lipid transfer protein 6
3	At1g30795	0.66	264499_at	Glycine-rich protein family
2	At1g69420	0.66	260347_at	DHHC-type zinc finger family protein
3	At5g07510	0.659	250635_at	ATGRP-4_ATGRP14_GRP-4_GRP14__glycine-rich protein 14
3	At5g07530	0.659	250637_at	ATGRP-7_ATGRP17_GRP17__glycine rich protein 17
4	At4g16447	0.658	245341_at
3	At1g61110	0.658	264882_at	NAC025_anac025__NAC domain containing protein 25
4	At1g51460	0.657	260515_at	ABCG13__ABC-2 type transporter family protein
3	At4g22730	0.657	254332_at	Leucine-rich repeat protein kinase family protein
1	At2g42800	0.657	263971_at	AtRLP29_RLP29__receptor like protein 29
3	At1g14900	0.656	262840_at	HMGA__high mobility group A
1	At5g47600	0.656	248752_at	HSP20-like chaperones superfamily protein
4	At3g26140	0.655	257629_at	Cellulase (glycosyl hydrolase family 5) protein
4	At3g50280	0.655	252200_at	HXXXD-type acyl-transferase family protein
3	At1g75930	0.655	262675_at	EXL6__extracellular lipase 6
3	At3g01140	0.654	259281_at	AtMYB106_MYB106_NOK__myb domain protein 106
2	At5g07520	0.654	250636_at	ATGRP-8_ATGRP18_GRP18__glycine-rich protein 18
5	At1g10850	0.653	262783_at	Leucine-rich repeat protein kinase family protein
4	At3g58780	0.653	251555_at	AGL1_SHP1__K-box region and MADS-box transcription factor family protein
1	At1g02800	0.653	262121_at	ATCEL2_CEL2__cellulase 2
1	At1g75240	0.653	256452_at	AtHB33_HB33_ZHD5__homeobox protein 33
5	At3g06160	0.651	256418_at	AP2/B3-like transcriptional factor family protein
3	At2g40610	0.651	255822_at	ATEXP8_ATEXPA8_ATHEXP ALPHA 1.11_EXP8_EXPA8__expansin A8
3	At3g06450	0.651	258913_at	HCO3- transporter family
5	At5g63140	0.65	247362_at	ATPAP29_PAP29__purple acid phosphatase 29
4	At5g12270	0.65	245204_at	2-oxoglutarate (2OG) and Fe(II)-dependent oxygenase superfamily protein
2	At1g72250	0.65	259851_at	Di-glucose binding protein with Kinesin motor domain
2	At2g28950	0.65	266790_at	ATEXP6_ATEXPA6_ATHEXP ALPHA 1.8_EXPA6__expansin A6
2	At2g46420	0.65	263787_at	Plant protein 1589 of unknown function
5	At3g05400	0.649	259133_at	Major facilitator superfamily protein
4	At2g12480	0.647	263306_at	SCPL43__serine carboxypeptidase-like 43
2	At1g06000	0.647	260955_at	UDP-Glycosyltransferase superfamily protein
2	At2g23800	0.647	267295_at	GGPS2_GGPS5__geranylgeranyl pyrophosphate synthase 2
2	At5g07550	0.647	250610_at	ATGRP19_GRP19__glycine-rich protein 19
2	At5g61605	0.646	247546_at
3	At5g23960	0.645	249760_at	ATTPS21_TPS21__terpene synthase 21
2	At1g23570	0.645	257402_at	Domain of unknown function (DUF220)
2	At3g27360	0.644	257714_at	H3.1__Histone superfamily protein
1	At4g29360	0.644	253729_at	O-Glycosyl hydrolases family 17 protein
2	At3g52810	0.643	252005_at	ATPAP21_PAP21__purple acid phosphatase 21
2	At4g31360	0.643	253516_at	selenium binding
7	At1g24020	0.642	263034_at	MLP423__MLP-like protein 423
3	At5g07560	0.642	250639_at	ATGRP20_GRP20__glycine-rich protein 20
2	At1g16060	0.642	261794_at	ADAP_WRI3__ARIA-interacting double AP2 domain protein
3	At5g21100	0.641	246021_at	Plant L-ascorbate oxidase
2	At1g23240	0.641	262987_at	Caleosin-related family protein
5	At1g06420	0.64	259394_at
3	At2g34870	0.64	267431_at	MEE26__hydroxyproline-rich glycoprotein family protein
7	At1g52030	0.639	265058_s_at	F-ATMBP_MBP1.2_MBP2__myrosinase-binding protein 2
7	At4g15210	0.638	245275_at	AT-BETA-AMY_ATBETA-AMY_BAM5_BMY1_RAM1__beta-amylase 5
4	At3g45610	0.638	252586_at	DOF6__Dof-type zinc finger DNA-binding family protein
3	At4g14750	0.638	245574_at	IQD19__IQ-domain 19
2	At5g07540	0.638	250638_at	ATGRP-6_ATGRP16_GRP16__glycine-rich protein 16
6	At3g18850	0.637	256652_at	LPAT5__lysophosphatidyl acyltransferase 5
3	At5g19090	0.637	249969_at	Heavy metal transport/detoxification superfamily protein
2	At1g02470	0.636	260933_at	Polyketide cyclase/dehydrase and lipid transport superfamily protein
1	At3g50070	0.636	252189_at	CYCD3;3__CYCLIN D3;3
2	At1g01300	0.635	261055_at	Eukaryotic aspartyl protease family protein
2	At3g15400	0.635	258392_at	ATA20__anther 20
1	254282_at	0.635	254282_at
1	At5g28640	0.635	246103_at	AN3_ATGIF1_GIF_GIF1__SSXT family protein
6	At2g36490	0.634	263909_at	AtROS1_DML1_ROS1__demeter-like 1
3	At4g22200	0.634	254305_at	AKT2_AKT2/3_AKT3_KT2/3__potassium transport 2/3
2	At1g66850	0.634	256381_at	Bifunctional inhibitor/lipid-transfer protein/seed storage 2S albumin superfamily protein
1	At1g01130	0.634	261575_at
2	At1g28430	0.633	261499_at	CYP705A24__cytochrome P450, family 705, subfamily A, polypeptide 24
2	At1g23590	0.632	265180_at	Domain of unknown function DUF220
2	At3g59420	0.632	251521_at	ACR4_CR4__crinkly4
5	At5g49130	0.631	248643_at	MATE efflux family protein
3	At1g28375	0.631	261442_at
1	At3g05470	0.629	259136_at	Actin-binding FH2 (formin homology 2) family protein
3	At1g10640	0.628	261834_at	Pectin lyase-like superfamily protein
2	At4g39860	0.628	252821_at
2	At5g67070	0.628	247037_at	RALFL34__ralf-like 34
2	At3g53300	0.627	251988_at	CYP71B31__cytochrome P450, family 71, subfamily B, polypeptide 31
3	At4g39330	0.626	252943_at	ATCAD9_CAD9__cinnamyl alcohol dehydrogenase 9
2	At2g28630	0.626	263443_at	KCS12__3-ketoacyl-CoA synthase 12
2	At5g61130	0.626	247563_at	AtPDCB1_PDCB1__plasmodesmata callose-binding protein 1
1	At3g22790	0.626	258341_at	NET1A__Kinase interacting (KIP1-like) family protein
3	At5g17760	0.625	250062_at	P-loop containing nucleoside triphosphate hydrolases superfamily protein
3	At5g22500	0.625	249895_at	FAR1__fatty acid reductase 1
2	At3g14240	0.625	258368_at	Subtilase family protein
1	At5g43020	0.625	249184_at	Leucine-rich repeat protein kinase family protein
6	At5g62210	0.624	247463_at	Embryo-specific protein 3, (ATS3)
5	At5g49330	0.624	248596_at	ATMYB111_MYB111_PFG3__myb domain protein 111
4	At3g28050	0.624	257299_at	UMAMIT41__nodulin MtN21 /EamA-like transporter family protein
3	At5g16190	0.624	246494_at	ATCSLA11_CSLA11__cellulose synthase like A11
3	At5g45670	0.624	248912_at	GDSL-like Lipase/Acylhydrolase superfamily protein
4	At1g25330	0.623	245640_at	CES_HAF__basic helix-loop-helix (bHLH) DNA-binding superfamily protein
4	At4g10955	0.623	254959_at	alpha/beta-Hydrolases superfamily protein
3	At1g75880	0.623	262680_at	SGNH hydrolase-type esterase superfamily protein
3	At4g36770	0.623	246256_at	UDP-Glycosyltransferase superfamily protein
1	At1g47740	0.623	261740_at	PPPDE putative thiol peptidase family protein
4	At1g75580	0.622	257460_at	SAUR51__SAUR-like auxin-responsive protein family
2	At2g05790	0.622	265377_at	O-Glycosyl hydrolases family 17 protein
1	At3g23890	0.622	256864_at	ATTOPII_TOPII__topoisomerase II
1	At2g07690	0.621	266959_at	MCM5__Minichromosome maintenance (MCM2/3/5) family protein
4	At1g03170	0.62	264363_at	FAF2_FTM5__Protein of unknown function (DUF3049)
3	At5g52390	0.62	248333_at	PAR1 protein
2	At1g54570	0.62	264186_at	PES1__Esterase/lipase/thioesterase family protein
1	At4g28310	0.619	253817_at
6	At5g50790	0.618	248496_at	AtSWEET10_SWEET10__Nodulin MtN3 family protein
2	At1g66120	0.618	256521_at	AAE11_AtAAE11__AMP-dependent synthetase and ligase family protein
5	At4g13710	0.617	254689_at	Pectin lyase-like superfamily protein
4	At3g21310	0.617	258042_at	Core-2/I-branching beta-1,6-N-acetylglucosaminyltransferase family protein
2	At5g26850	0.617	246849_at	Uncharacterized protein
4	At5g67110	0.616	247035_at	ALC__basic helix-loop-helix (bHLH) DNA-binding superfamily protein
1	At4g38660	0.616	252954_at	Pathogenesis-related thaumatin superfamily protein
3	At2g04570	0.615	263809_at	GDSL-like Lipase/Acylhydrolase superfamily protein
3	At4g16140	0.615	245479_at	proline-rich family protein
1	At5g03390	0.615	250920_at	Protein of unknown function (DUF295)
4	At1g60060	0.614	263738_at	Serine/threonine-protein kinase WNK (With No Lysine)-related
4	At1g67830	0.614	245215_at	ATFXG1_FXG1__alpha-fucosidase 1
2	At1g77630	0.614	259763_at	LYM3_LYP3__Peptidoglycan-binding LysM domain-containing protein
2	At4g28440	0.614	253775_at	Nucleic acid-binding, OB-fold-like protein
1	At4g33260	0.613	253340_s_at	AtCDC20.2_CDC20.2__Transducin family protein / WD-40 repeat family protein
4	At2g42300	0.612	265880_at	basic helix-loop-helix (bHLH) DNA-binding superfamily protein
3	At1g02340	0.611	259417_at	FBI1_HFR1_REP1_RSF1__basic helix-loop-helix (bHLH) DNA-binding superfamily protein
3	At4g25010	0.611	254090_at	AtSWEET14_SWEET14__Nodulin MtN3 family protein
2	At4g18570	0.611	254649_at	Tetratricopeptide repeat (TPR)-like superfamily protein
6	At4g39480	0.61	252896_at	CYP96A9__cytochrome P450, family 96, subfamily A, polypeptide 9
2	At1g48610	0.61	261306_at	AT hook motif-containing protein
1	At4g37750	0.61	253010_at	ANT_CKC_CKC1_DRG__Integrase-type DNA-binding superfamily protein
6	At5g16440	0.609	250117_at	IPP1__isopentenyl diphosphate isomerase 1
5	At1g68560	0.609	262230_at	ATXYL1_AXY3_TRG1_XYL1__alpha-xylosidase 1
4	At4g21903	0.609	254389_s_at	MATE efflux family protein
3	At1g11850	0.609	264343_at
1	At4g23800	0.609	254233_at	3xHMG-box2__HMG (high mobility group) box protein
1	At3g51280	0.607	252148_at	Tetratricopeptide repeat (TPR)-like superfamily protein
4	At3g51240	0.606	252123_at	F3'H_F3H_TT6__flavanone 3-hydroxylase
2	At3g10320	0.606	259150_at	Glycosyltransferase family 61 protein
2	At1g61170	0.605	264884_at
1	At4g09510	0.605	255038_at	A/N-InvI_CINV2__cytosolic invertase 2
6	At3g22420	0.604	258456_at	ATWNK2_WNK2_ZIK3__with no lysine (K) kinase 2
2	At5g38130	0.604	249541_at	HXXXD-type acyl-transferase family protein
1	At5g51560	0.604	248420_at	Leucine-rich repeat protein kinase family protein
1	At5g55670	0.604	248071_at	RNA-binding (RRM/RBD/RNP motifs) family protein
6	At3g04290	0.603	258589_at	ATLTL1_LTL1__Li-tolerant lipase 1
5	At2g23180	0.603	245075_at	CYP96A1__cytochrome P450, family 96, subfamily A, polypeptide 1
1	At3g15550	0.603	257290_at
1	At5g44560	0.603	249060_at	VPS2.2__SNF7 family protein
2	At1g30330	0.602	256311_at	ARF6__auxin response factor 6
2	At3g22780	0.602	258324_at	ATTSO1_TSO1__Tesmin/TSO1-like CXC domain-containing protein
1	At5g22880	0.602	249916_at	H2B_HTB2__histone B2
3	At1g79060	0.601	257427_at
2	At1g74690	0.601	262210_at	IQD31__IQ-domain 31
2	At1g77870	0.601	262196_at	MUB5__membrane-anchored ubiquitin-fold protein 5 precursor
1	At4g20050	0.601	254494_at	QRT3__Pectin lyase-like superfamily protein
1	At5g50740	0.601	248527_at	Heavy metal transport/detoxification superfamily protein
2	At2g17845	0.6	264791_at	NAD(P)-binding Rossmann-fold superfamily protein
1	At2g26400	0.6	245035_at	ARD_ARD3_ATARD3__acireductone dioxygenase 3
4	At1g25510	0.599	255727_at	Eukaryotic aspartyl protease family protein
3	At1g01600	0.599	259429_at	CYP86A4__cytochrome P450, family 86, subfamily A, polypeptide 4
2	At1g31650	0.599	246576_at	ATROPGEF14_ROPGEF14__RHO guanyl-nucleotide exchange factor 14
2	At3g08680	0.599	258684_at	Leucine-rich repeat protein kinase family protein
3	At1g12570	0.598	259526_at	Glucose-methanol-choline (GMC) oxidoreductase family protein
3	At1g51170	0.598	265144_at	AGC2-3_UCN__Protein kinase superfamily protein
3	At5g50335	0.598	248509_at
1	At1g13130	0.598	262795_at	Cellulase (glycosyl hydrolase family 5) protein
1	At2g26330	0.598	267376_at	ER_QRP1__Leucine-rich receptor-like protein kinase family protein
5	At3g06840	0.596	258530_at
4	At3g17840	0.596	258159_at	RLK902__receptor-like kinase 902
1	At3g02110	0.596	258857_at	scpl25__serine carboxypeptidase-like 25
1	At3g15095	0.596	257236_at	HCF243__
3	At4g16360	0.595	245260_at	KIN&#946;2__5'-AMP-activated protein kinase beta-2 subunit protein
2	At1g14180	0.595	262654_at	RING/U-box superfamily protein
2	At5g23420	0.595	249836_at	HMGB6__high-mobility group box 6
1	At1g68400	0.595	259858_at	leucine-rich repeat transmembrane protein kinase family protein
6	At4g04020	0.594	255364_s_at	FIB_PGL35__fibrillin
5	At5g66590	0.594	247074_at	CAP (Cysteine-rich secretory proteins, Antigen 5, and Pathogenesis-related 1 protein) superfamily protein
1	At2g06200	0.594	265531_at	AtGRF6_GRF6__growth-regulating factor 6
3	At3g45940	0.593	252555_at	Glycosyl hydrolases family 31 protein
2	At1g11190	0.593	262454_at	BFN1_ENDO1__bifunctional nuclease i
2	At4g16130	0.593	245478_at	ARA1_ATISA1_ISA1__arabinose kinase
2	At5g08260	0.593	250517_at	scpl35__serine carboxypeptidase-like 35
1	At1g23610	0.593	265165_at
1	At5g10400	0.592	250433_at	H3.1__Histone superfamily protein
2	At5g58782	0.591	247796_at	AtcPT6_cPT6__Undecaprenyl pyrophosphate synthetase family protein
1	At4g23860	0.591	254177_at	PHD finger protein-related
1	At2g37050	0.59	265467_at	Leucine-rich repeat protein kinase family protein
2	At1g29490	0.589	259785_at	SAUR68__SAUR-like auxin-responsive protein family
1	At1g30350	0.589	256307_at	Pectin lyase-like superfamily protein
6	At4g34588	0.588	253245_at	CPuORF2__conserved peptide upstream open reading frame 2
3	At4g00820	0.588	255642_at	iqd17__IQ-domain 17
1	At5g59010	0.588	247743_at	BSK5__Protein kinase protein with tetratricopeptide repeat domain
6	At2g18230	0.587	265339_at	AtPPa2_PPa2__pyrophosphorylase 2
5	At1g49430	0.587	262414_at	LACS2_LRD2__long-chain acyl-CoA synthetase 2
3	At1g15360	0.587	262595_at	AtSHN1_SHN1_WIN1__Integrase-type DNA-binding superfamily protein
1	At1g72670	0.587	259912_at	iqd8__IQ-domain 8
1	At1g23670	0.586	265185_at	Domain of unknown function (DUF220)
1	At4g32710	0.586	253397_at	PERK14__Protein kinase superfamily protein
2	At5g51810	0.585	248371_at	AT2353_ATGA20OX2_GA20OX2__gibberellin 20 oxidase 2
1	At1g75640	0.585	262971_at	Leucine-rich receptor-like protein kinase family protein
1	At3g61830	0.585	251289_at	ARF18__auxin response factor 18
3	At3g19620	0.584	257017_at	Glycosyl hydrolase family protein
3	At3g44610	0.584	252646_at	Protein kinase superfamily protein
3	At4g17480	0.584	245389_at	alpha/beta-Hydrolases superfamily protein
2	At4g22140	0.584	254342_at	EBS__PHD finger family protein / bromo-adjacent homology (BAH) domain-containing protein
2	At4g35020	0.584	253225_at	ARAC3_ATROP6_RAC3_RHO1PS_ROP6__RAC-like 3
1	At1g76540	0.584	259978_at	CDKB2;1__cyclin-dependent kinase B2;1
1	At5g25475	0.584	246906_at	AP2/B3-like transcriptional factor family protein
1	At1g01370	0.583	261058_at	CENH3_HTR12__Histone superfamily protein
3	At3g07540	0.581	259021_at	Actin-binding FH2 (formin homology 2) family protein
1	At1g76310	0.581	261780_at	CYCB2;4__CYCLIN B2;4
1	At3g51740	0.581	252078_at	IMK2__inflorescence meristem receptor-like kinase 2
5	At1g19830	0.58	261137_at	SAUR54__SAUR-like auxin-responsive protein family
4	At3g50890	0.58	252129_at	AtHB28_HB28_ZHD7__homeobox protein 28
1	At5g62390	0.58	247480_at	ATBAG7_BAG7__BCL-2-associated athanogene 7
2	At1g52310	0.579	259670_at	protein kinase family protein / C-type lectin domain-containing protein
2	At4g21630	0.579	254394_at	Subtilase family protein
1	At1g23520	0.579	265176_at	Domain of unknown function (DUF220)
4	At1g23010	0.578	264752_at	LPR1__Cupredoxin superfamily protein
4	At3g55110	0.578	251826_at	ABCG18__ABC-2 type transporter family protein
3	At4g15790	0.578	245364_at
2	At1g75290	0.578	256450_at	NAD(P)-binding Rossmann-fold superfamily protein
2	At2g24630	0.578	263793_at	ATCSLC08_ATCSLC8_CSLC08__Glycosyl transferase family 2 protein
2	At2g42840	0.578	263979_at	PDF1__protodermal factor 1
2	At5g05670	0.578	250768_at	signal recognition particle binding
1	At3g23730	0.578	257203_at	XTH16__xyloglucan endotransglucosylase/hydrolase 16
1	At3g56100	0.578	251718_at	IMK3_MRLK__meristematic receptor-like kinase
3	At1g71830	0.577	261521_at	ATSERK1_SERK1__somatic embryogenesis receptor-like kinase 1
2	At4g09460	0.577	255037_at	AtMYB6_MYB6__myb domain protein 6
1	265693_at	0.577	265693_at
1	At1g13710	0.577	256099_at	CYP78A5_KLU__cytochrome P450, family 78, subfamily A, polypeptide 5
1	At1g53160	0.577	261375_at	FTM6_SPL4__squamosa promoter binding protein-like 4
1	At3g57830	0.577	251605_at	Leucine-rich repeat protein kinase family protein
4	At1g22015	0.576	255956_at	DD46__Galactosyltransferase family protein
2	At5g10770	0.576	250446_at	Eukaryotic aspartyl protease family protein
2	At5g48500	0.576	248685_at
1	At1g19850	0.576	255782_at	ARF5_IAA24_MP__Transcriptional factor B3 family protein / auxin-responsive factor AUX/IAA-related
1	At3g13690	0.576	256769_at	Protein kinase protein with adenine nucleotide alpha hydrolases-like domain
2	At1g30440	0.575	261796_at	Phototropic-responsive NPH3 family protein
2	At5g48485	0.575	248684_at	DIR1__Bifunctional inhibitor/lipid-transfer protein/seed storage 2S albumin superfamily protein
1	At2g37630	0.575	267157_at	AS1_ATMYB91_ATPHAN_MYB91__myb-like HTH transcriptional regulator family protein
4	At3g49900	0.574	252227_at	Phototropic-responsive NPH3 family protein
4	At5g56490	0.574	248020_at	AtGulLO4_GulLO4__D-arabinono-1,4-lactone oxidase family protein
3	At1g09155	0.574	264263_at	AtPP2-B15_PP2-B15__phloem protein 2-B15
3	At4g04890	0.574	255277_at	PDF2__protodermal factor 2
2	At5g50610	0.574	248525_s_at
1	At2g02170	0.574	266117_at	Remorin family protein
4	At5g66330	0.573	247087_at	Leucine-rich repeat (LRR) family protein
3	At5g53200	0.573	248246_at	TRY__Homeodomain-like superfamily protein
1	At2g03070	0.573	266795_at	MED8__mediator subunit 8
3	At4g14200	0.572	245598_at	Pentatricopeptide repeat (PPR) superfamily protein
1	At1g07790	0.572	261411_at	HTB1__Histone superfamily protein
2	At1g35780	0.571	261286_at
2	At4g21750	0.571	254370_at	ATML1__Homeobox-leucine zipper family protein / lipid-binding START domain-containing protein
2	At5g49180	0.571	248593_at	Plant invertase/pectin methylesterase inhibitor superfamily
1	At2g16270	0.571	263607_at
1	At5g56220	0.571	248003_at	P-loop containing nucleoside triphosphate hydrolases superfamily protein
1	At5g63950	0.571	247310_at	CHR24__chromatin remodeling 24
2	At1g75910	0.57	262674_at	EXL4__extracellular lipase 4
1	At1g02730	0.57	262109_at	ATCSLD5_SOS6__cellulose synthase-like D5
1	At1g44780	0.57	261325_at
1	At1g67040	0.57	255851_at	TRM22__
1	At3g26125	0.57	257633_at	CYP86C2__cytochrome P450, family 86, subfamily C, polypeptide 2
1	At4g26760	0.57	253947_at	MAP65-2__microtubule-associated protein 65-2
1	At4g34400	0.57	253258_at	AP2/B3-like transcriptional factor family protein
4	At5g51750	0.569	248427_at	ATSBT1.3_SBT1.3__subtilase 1.3
3	At1g28710	0.569	262750_at	Nucleotide-diphospho-sugar transferase family protein
2	At1g45190	0.569	260942_s_at	DD18__downregulated in DIF1 18
2	At1g77270	0.569	264478_at
2	At4g25700	0.569	254020_at	B1_BCH1_BETA-OHASE 1_chy1__beta-hydroxylase 1
1	At2g17560	0.569	263074_at	HMGB4_NFD04_NFD4__high mobility group B4
1	At5g64980	0.569	247234_at
2	At3g56610	0.568	251698_at
2	At4g32170	0.568	253461_at	CYP96A2__cytochrome P450, family 96, subfamily A, polypeptide 2
3	At1g75388	0.567	261114_at	CPuORF5__conserved peptide upstream open reading frame 5
2	At1g51440	0.567	260491_at	DALL2__alpha/beta-Hydrolases superfamily protein
1	At3g61240	0.567	251362_at	DEA(D/H)-box RNA helicase family protein
2	At5g04770	0.566	250860_at	ATCAT6_CAT6__cationic amino acid transporter 6
1	At1g23650	0.566	265179_at
6	At1g78170	0.565	260081_at
5	At3g11000	0.565	257579_at	DCD (Development and Cell Death) domain protein
2	At1g14840	0.565	262847_at	ATMAP70-4_MAP70-4__microtubule-associated proteins 70-4
1	At1g08560	0.565	264802_at	ATSYP111_KN_SYP111__syntaxin of plants 111
1	At1g18370	0.565	261660_at	ATNACK1_HIK_NACK1__ATP binding microtubule motor family protein
5	At4g34980	0.564	253218_at	SLP2__subtilisin-like serine protease 2
2	At3g57510	0.564	251635_at	ADPG1__Pectin lyase-like superfamily protein
1	At2g22610	0.564	265349_at	Di-glucose binding protein with Kinesin motor domain
1	At4g15480	0.564	245560_at	UGT84A1__UDP-Glycosyltransferase superfamily protein
2	At2g26440	0.563	245052_at	PME12__Plant invertase/pectin methylesterase inhibitor superfamily
1	At3g13560	0.563	256962_at	O-Glycosyl hydrolases family 17 protein
1	At5g03670	0.563	250907_at	TRM28__
1	At5g27740	0.563	246738_at	EMB161_EMB251_EMB2775_RFC3__ATPase family associated with various cellular activities (AAA)
3	At1g23600	0.562	265164_at	Domain of unknown function DUF220
1	At1g44900	0.562	261330_at	ATMCM2_MCM2__minichromosome maintenance (MCM2/3/5) family protein
1	At2g31730	0.562	263467_at	basic helix-loop-helix (bHLH) DNA-binding superfamily protein
1	At3g13510	0.562	256960_at	Protein of Unknown Function (DUF239)
4	At1g78570	0.561	263134_at	ATRHM1_RHM1_ROL1__rhamnose biosynthesis 1
3	At2g40540	0.561	255829_at	ATKT2_ATKUP2_KT2_KUP2_SHY3_TRK2__potassium transporter 2
2	At2g35340	0.561	266627_at	MEE29__helicase domain-containing protein
2	At4g00950	0.561	255652_at	MEE47__Protein of unknown function (DUF688)
2	At5g43270	0.561	249144_at	SPL2__squamosa promoter binding protein-like 2
4	At3g12000	0.56	256636_at	S-locus related protein SLR1, putative (S1)
2	At1g04220	0.56	264318_at	KCS2__3-ketoacyl-CoA synthase 2
1	At1g11130	0.56	262451_at	SCM_SRF9_SUB__Leucine-rich repeat protein kinase family protein
1	At3g25980	0.56	258067_at	AtMAD2_MAD2__DNA-binding HORMA family protein
2	At3g20010	0.559	256625_at	SNF2 domain-containing protein / helicase domain-containing protein / zinc finger protein-related
2	At4g24790	0.559	254118_at	AAA-type ATPase family protein
1	At1g26780	0.559	261274_at	AtMYB117_LOF1_MYB117__myb domain protein 117
4	At4g21620	0.558	254372_at	glycine-rich protein
4	At5g13930	0.558	250207_at	ATCHS_CHS_TT4__Chalcone and stilbene synthase family protein
4	At5g19730	0.558	245965_at	Pectin lyase-like superfamily protein
3	At3g21750	0.558	257949_at	UGT71B1__UDP-glucosyl transferase 71B1
1	At2g15400	0.558	263564_s_at	NRPE3B_RBP36B__DNA-directed RNA polymerase family protein
1	At2g21060	0.558	264026_at	ATCSP4_ATGRP2B_GRP2B__glycine-rich protein 2B
3	At4g14930	0.557	245330_at	Survival protein SurE-like phosphatase/nucleotidase
2	At3g51290	0.557	252149_at	APSR1__Protein of unknown function (DUF630) ;Protein of unknown function (DUF632)
2	At5g44620	0.557	249012_at	CYP706A3__cytochrome P450, family 706, subfamily A, polypeptide 3
1	At1g78650	0.557	263130_at	POLD3__DNA-directed DNA polymerases
1	At3g63130	0.557	251152_at	ATRANGAP1_RANGAP1__RAN GTPase activating protein 1
4	At4g24000	0.556	254189_at	ATCSLG2_CSLG2__cellulose synthase like G2
3	At3g22910	0.556	256833_at	ACA13__ATPase E1-E2 type family protein / haloacid dehalogenase-like hydrolase family protein
3	At5g10020	0.556	250462_at	SIRK1__Leucine-rich receptor-like protein kinase family protein
1	At1g17140	0.556	262538_at	ICR1_RIP1__interactor of constitutive active rops 1
1	At1g21810	0.556	262494_at	Plant protein of unknown function (DUF869)
1	At2g22420	0.556	264001_at	Peroxidase superfamily protein
1	At4g15140	0.556	245309_at
3	At3g10890	0.555	258767_at	Glycosyl hydrolase superfamily protein
2	At1g16780	0.555	255760_at	AtVHP2;2_VHP2;2__Inorganic H pyrophosphatase family protein
2	At3g15540	0.555	258399_at	IAA19_MSG2__indole-3-acetic acid inducible 19
3	At5g17010	0.554	246466_at	Major facilitator superfamily protein
1	At1g62030	0.554	264310_at	Cysteine/Histidine-rich C1 domain family protein
1	At5g17700	0.554	250045_at	MATE efflux family protein
5	At1g70270	0.553	264341_at
3	At1g29510	0.553	259783_at	SAUR67__SAUR-like auxin-responsive protein family
2	At1g69700	0.553	260368_at	ATHVA22C_HVA22C__HVA22 homologue C
2	At2g47270	0.553	260527_at	UPB1__sequence-specific DNA binding transcription factors;transcription regulators
2	At3g20210	0.553	257130_at	DELTA-VPE_DELTAVPE__delta vacuolar processing enzyme
2	At5g52280	0.553	248344_at	Myosin heavy chain-related protein
1	At1g59540	0.553	262081_at	ZCF125__P-loop containing nucleoside triphosphate hydrolases superfamily protein
1	At2g39870	0.553	267339_at
1	At5g38690	0.553	249521_at	Zinc-finger domain of monoamine-oxidase A repressor R1 protein
3	At1g20120	0.552	261222_at	GDSL-like Lipase/Acylhydrolase superfamily protein
2	At2g29550	0.552	266295_at	TUB7__tubulin beta-7 chain
2	At3g11430	0.552	259282_at	ATGPAT5_GPAT5__glycerol-3-phosphate acyltransferase 5
2	At5g45940	0.552	248923_at	AtNUDT11_AtNUDX11_NUDT11_NUDX11__nudix hydrolase homolog 11
1	At3g45930	0.552	252562_s_at	Histone superfamily protein
1	At4g02060	0.552	255513_at	MCM7_PRL__Minichromosome maintenance (MCM2/3/5) family protein
1	At4g33400	0.552	253357_at	Vacuolar import/degradation, Vid27-related protein
1	At5g35910	0.552	249672_at	Polynucleotidyl transferase, ribonuclease H fold protein with HRDC domain
5	At3g01530	0.551	259187_at	ATMYB57_MYB57__myb domain protein 57
3	At2g39330	0.551	266989_at	JAL23__jacalin-related lectin 23
2	At3g18210	0.551	258154_at	2-oxoglutarate (2OG) and Fe(II)-dependent oxygenase superfamily protein
2	At5g67200	0.551	246983_at	Leucine-rich repeat protein kinase family protein
2	At4g18980	0.55	254597_at	AtS40-3__AtS40-3
1	At1g20330	0.55	255885_at	CVP1_FRL1_SMT2__sterol methyltransferase 2
1	At2g02540	0.55	267271_at	ATHB21_HB21_ZFHD4_ZHD3__homeobox protein 21
1	At4g36180	0.55	253078_at	Leucine-rich receptor-like protein kinase family protein
2	At3g25050	0.549	257102_at	XTH3__xyloglucan endotransglucosylase/hydrolase 3
2	At4g26590	0.549	253984_at	ATOPT5_OPT5__oligopeptide transporter 5
2	At4g33130	0.549	253363_at
2	At5g50800	0.549	248467_at	AtSWEET13_SWEET13__Nodulin MtN3 family protein
1	At1g04520	0.549	263677_at	PDLP2__plasmodesmata-located protein 2
1	At3g20180	0.549	257118_at	Copper transport protein family
1	At3g21040	0.549	256977_at	transposable element gene
1	At5g01890	0.549	251075_at	PXC2__Leucine-rich receptor-like protein kinase family protein
1	At5g67270	0.549	247039_at	ATEB1C_ATEB1H1_EB1C__end binding protein 1C
6	At1g69870	0.548	260410_at	AtNPF2.13_NPF2.13_NRT1.7__nitrate transporter 1.7
3	At3g59530	0.548	251469_at	LAP3__Calcium-dependent phosphotriesterase superfamily protein
2	At3g52110	0.548	252089_at
2	At5g41060	0.548	249290_at	DHHC-type zinc finger family protein
2	At5g54400	0.548	248154_at	S-adenosyl-L-methionine-dependent methyltransferases superfamily protein
1	At3g54560	0.548	251846_at	HTA11__histone H2A 11
1	At4g21270	0.548	254400_at	ATK1_KATA_KATAP__kinesin 1
1	At5g07180	0.548	250642_at	ERL2__ERECTA-like 2
4	At5g64850	0.547	247214_at
1	At1g60890	0.547	259721_at	Phosphatidylinositol-4-phosphate 5-kinase family protein
1	At3g01410	0.547	258952_at	Polynucleotidyl transferase, ribonuclease H-like superfamily protein
1	At3g53760	0.547	251907_at	ATGCP4_GCP4__GAMMA-TUBULIN COMPLEX PROTEIN 4
1	At3g61610	0.547	251319_at	Galactose mutarotase-like superfamily protein
1	At4g31840	0.547	253480_at	AtENODL15_ENODL15__early nodulin-like protein 15
1	At5g15580	0.547	246562_at	LNG1_TRM2__longifolia1
1	At5g55820	0.547	248054_at	WYR__
4	At5g41870	0.546	249275_at	Pectin lyase-like superfamily protein
3	At1g78680	0.546	264250_at	ATGGH2_GGH2__gamma-glutamyl hydrolase 2
2	At5g02530	0.546	250996_at	RNA-binding (RRM/RBD/RNP motifs) family protein
1	At3g06030	0.546	258471_at	ANP3_AtANP3_MAPKKK12_NP3__NPK1-related protein kinase 3
6	At1g55120	0.545	256150_at	ATFRUCT5_AtcwINV3_FRUCT5__beta-fructofuranosidase 5
4	At3g61550	0.545	251330_at	RING/U-box superfamily protein
4	At4g27590	0.545	253880_at	Heavy metal transport/detoxification superfamily protein
1	At1g60800	0.545	264930_at	AtNIK3_NIK3__NSP-interacting kinase 3
1	At1g51510	0.544	260487_at	Y14__RNA-binding (RRM/RBD/RNP motifs) family protein
1	At3g58650	0.544	251527_at	TRM7__
1	At5g03870	0.544	250864_at	Glutaredoxin family protein
2	At1g30080	0.543	260024_at	Glycosyl hydrolase superfamily protein
2	At2g32530	0.543	267115_s_at	ATCSLB03_ATCSLB3_CSLB03__cellulose synthase-like B3
2	At5g19290	0.543	246041_at	alpha/beta-Hydrolases superfamily protein
2	At5g43510	0.543	249157_at	AtLURE1.2_CRP810_1.2_LURE1.2__Putative membrane lipoprotein
1	At1g18650	0.543	255779_at	PDCB3__plasmodesmata callose-binding protein 3
5	At3g14560	0.542	258091_at
3	At3g55120	0.542	251827_at	A11_AtCHI_CFI_CHI_TT5__Chalcone-flavanone isomerase family protein
3	At3g55710	0.542	251750_at	UDP-Glycosyltransferase superfamily protein
2	At5g34883	0.542	246641_s_at	Protein of unknown function (DUF784)
2	At5g36670	0.542	249692_s_at	RING/FYVE/PHD zinc finger superfamily protein
1	At2g29210	0.542	266283_at	splicing factor PWI domain-containing protein
3	At2g21300	0.541	263751_at	ATP binding microtubule motor family protein
2	At1g09150	0.541	264254_at	pseudouridine synthase and archaeosine transglycosylase (PUA) domain-containing protein
2	At2g45560	0.541	267505_at	CYP76C1__cytochrome P450, family 76, subfamily C, polypeptide 1
2	At3g29280	0.541	256612_at
1	At2g01750	0.541	265864_at	ATMAP70-3_MAP70-3__microtubule-associated proteins 70-3
1	At3g19960	0.541	256623_at	ATM1__myosin 1
6	At2g44770	0.54	266880_at	ELMO/CED-12 family protein
3	At1g65060	0.54	261907_at	4CL3__4-coumarate:CoA ligase 3
2	At3g09980	0.54	258933_at	ACIP1__Family of unknown function (DUF662)
2	At5g67360	0.54	246990_at	ARA12__Subtilase family protein
1	At1g69770	0.54	260417_at	CMT3__chromomethylase 3
3	At1g44970	0.539	260941_at	Peroxidase superfamily protein
3	At5g42100	0.539	249235_at	ATBG_PPAP_BG_PPAP__beta-1,3-glucanase_putative
2	At1g66540	0.539	256386_at	Cytochrome P450 superfamily protein
1	At3g17360	0.539	258464_at	POK1__phragmoplast orienting kinesin 1
1	At5g53770	0.539	248231_at	Nucleotidyltransferase family protein
3	At2g43550	0.538	260547_at	Scorpion toxin-like knottin superfamily protein
2	At1g75940	0.538	262697_at	ATA27_BGLU20__Glycosyl hydrolase superfamily protein
2	At4g35550	0.538	253131_at	ATWOX13_HB-4_WOX13__WUSCHEL related homeobox 13
1	At3g42170	0.538	252847_at	DAYSLEEPER__BED zinc finger ;hAT family dimerisation domain
1	At3g50240	0.538	252215_at	KICP-02__ATP binding microtubule motor family protein
1	At4g02290	0.538	255517_at	AtGH9B13_GH9B13__glycosyl hydrolase 9B13
4	At1g53070	0.537	261368_at	Legume lectin family protein
4	At4g30500	0.537	253636_at	Protein of unknown function (DUF788)
3	At5g05270	0.537	250794_at	AtCHIL_CHIL__Chalcone-flavanone isomerase family protein
2	At1g06260	0.537	260788_at	Cysteine proteinases superfamily protein
1	At3g20150	0.537	257115_at	Kinesin motor family protein
1	At5g46280	0.537	248891_at	MCM3__Minichromosome maintenance (MCM2/3/5) family protein
4	At3g12710	0.536	257701_at	DNA glycosylase superfamily protein
2	At1g36340	0.536	260124_at	UBC31__ubiquitin-conjugating enzyme 31
1	At1g07370	0.536	261080_at	ATPCNA1_PCNA1__proliferating cellular nuclear antigen 1
1	At5g48650	0.536	248660_at	Nuclear transport factor 2 (NTF2) family protein with RNA binding (RRM-RBD-RNP motifs) domain
6	At5g24770	0.535	245928_s_at	ATVSP2_VSP2__vegetative storage protein 2
2	At1g71890	0.535	260170_at	ATSUC5_SUC5__Major facilitator superfamily protein
2	At2g39060	0.535	266201_at	AtSWEET9_SWEET9__Nodulin MtN3 family protein
2	At4g16515	0.535	245336_at	CLEL 6_GLV1_RGF6__
1	At2g11910	0.535	263636_at
1	At4g35050	0.535	253175_at	MSI3_NFC3__Transducin family protein / WD-40 repeat family protein
5	At3g61490	0.534	251317_at	Pectin lyase-like superfamily protein
2	At1g58360	0.534	256022_at	AAP1_AtAAP1_NAT2__amino acid permease 1
2	At2g17300	0.534	264909_at
2	At5g25590	0.534	246899_at	Protein of unknown function (DUF630 and DUF632)
1	At1g33940	0.534	260118_s_at
1	At2g36050	0.534	263953_at	ATOFP15_OFP15__ovate family protein 15
1	At5g59000	0.534	247747_at	RING/FYVE/PHD zinc finger superfamily protein
4	At5g15720	0.533	246526_at	GLIP7__GDSL-motif lipase 7
2	At2g27810	0.533	266254_at	ATNAT12_NAT12__nucleobase-ascorbate transporter 12
1	At3g53190	0.533	251982_at	Pectin lyase-like superfamily protein
2	At5g67100	0.532	247028_at	ICU2__DNA-directed DNA polymerases
1	At3g53310	0.532	251986_at	AP2/B3-like transcriptional factor family protein
4	At3g50530	0.531	252158_at	CRK__CDPK-related kinase
2	At1g75920	0.531	262683_at	GDSL-like Lipase/Acylhydrolase superfamily protein
2	At3g54080	0.531	251889_at	Concanavalin A-like lectin family protein
2	At5g42955	0.531	249179_at	Protein of unknown function (DUF784)
1	At1g01510	0.531	259438_at	AN_DOQ__NAD(P)-binding Rossmann-fold superfamily protein
1	At1g11600	0.531	262819_at	CYP77B1__cytochrome P450, family 77, subfamily B, polypeptide 1
1	At5g53620	0.531	248223_at
1	At5g62690	0.531	247442_s_at	TUB2__tubulin beta chain 2
5	At4g03070	0.53	255438_at	AOP_AOP1_AOP1.1__2-oxoglutarate (2OG) and Fe(II)-dependent oxygenase superfamily protein
2	At1g63670	0.53	260293_at	TRM12__Protein of unknown function (DUF3741)
2	At4g39680	0.53	252909_at	SAP domain-containing protein
2	At5g41600	0.53	249267_at	BTI3_RTNLB4__VIRB2-interacting protein 3
1	At2g21130	0.53	264019_at	Cyclophilin-like peptidyl-prolyl cis-trans isomerase family protein
1	At3g02600	0.53	258481_at	ATLPP3_LPP3__lipid phosphate phosphatase 3
5	At1g02205	0.529	264146_at	CER1_CER22__Fatty acid hydroxylase superfamily
3	At4g09740	0.529	255054_s_at	AtGH9B14_GH9B14__glycosyl hydrolase 9B14
2	At3g25040	0.529	257104_at	ERD2B__endoplasmic reticulum retention defective 2B
2	At5g50350	0.529	248556_at
1	At1g56020	0.529	262088_at
1	At1g71850	0.529	257487_at	Ubiquitin carboxyl-terminal hydrolase family protein
1	At2g16210	0.529	263092_at	Transcriptional factor B3 family protein
1	At4g00430	0.529	255674_at	PIP1;4_PIP1E_TMP-C__plasma membrane intrinsic protein 1;4
1	At5g06050	0.529	250761_at	Putative methyltransferase family protein
1	At5g51660	0.529	248418_at	ATCPSF160_CPSF160__cleavage and polyadenylation specificity factor 160
3	At5g23530	0.528	249794_at	AtCXE18_CXE18__carboxyesterase 18
1	At1g01110	0.528	261580_at	IQD18__IQ-domain 18
1	At1g78770	0.528	264293_at	APC6__anaphase promoting complex 6
1	At3g51720	0.528	252077_at	Plant protein of unknown function (DUF827)
4	At5g64570	0.527	247266_at	ATBXL4_XYL4__beta-D-xylosidase 4
1	At1g06760	0.527	260830_at	winged-helix DNA-binding transcription factor family protein
1	At3g25150	0.527	257817_at	Nuclear transport factor 2 (NTF2) family protein with RNA binding (RRM-RBD-RNP motifs) domain
1	At3g61250	0.527	251363_at	AtMYB17_LMI2_MYB17__myb domain protein 17
1	At5g67150	0.527	247040_at	HXXXD-type acyl-transferase family protein
4	At1g67750	0.526	245196_at	Pectate lyase family protein
3	At2g02780	0.526	267481_at	Leucine-rich repeat protein kinase family protein
2	At5g07280	0.526	250616_at	EMS1_EXS__Leucine-rich repeat transmembrane protein kinase
1	At3g19590	0.526	257020_at	BUB3.1__Transducin/WD40 repeat-like superfamily protein
1	At4g30610	0.526	253579_at	BRS1_SCPL24__alpha/beta-Hydrolases superfamily protein
3	At5g47710	0.525	248767_at	Calcium-dependent lipid-binding (CaLB domain) family protein
3	At3g43270	0.524	252740_at	Plant invertase/pectin methylesterase inhibitor superfamily
2	At5g23260	0.524	249851_at	ABS_AGL32_TT16__K-box region and MADS-box transcription factor family protein
1	At1g10980	0.524	260461_at	Lung seven transmembrane receptor family protein
1	At1g11820	0.524	264397_at	O-Glycosyl hydrolases family 17 protein
1	At1g26820	0.524	263689_at	RNS3__ribonuclease 3
1	At2g33560	0.524	255790_at	BUBR1__BUB1-related (BUB1: budding uninhibited by benzymidazol 1)
1	At4g38430	0.524	252975_s_at	ATROPGEF1_ROPGEF1__rho guanyl-nucleotide exchange factor 1
1	At5g09900	0.524	250456_at	EMB2107_MSA_RPN5A__26S proteasome regulatory subunit, putative (RPN5)
1	At5g23910	0.524	249809_at	ATP binding microtubule motor family protein
4	At5g05040	0.523	250815_s_at	Cystatin/monellin superfamily protein
2	At3g56090	0.523	251735_at	ATFER3_FER3__ferritin 3
1	At1g72050	0.523	256344_at	TFIIIA__transcription factor IIIA
1	At5g41970	0.523	249238_at	Metal-dependent protein hydrolase
1	At5g65410	0.523	247182_at	ATHB25_HB25_ZFHD2_ZHD1__homeobox protein 25
1	At5g67510	0.523	247010_at	Translation protein SH3-like family protein
3	At2g17470	0.522	257409_at	ALMT6_AtALMT6__Aluminium activated malate transporter family protein
1	264015_at	0.522	264015_at
1	At1g03780	0.522	265085_at	AtTPX2_TPX2__targeting protein for XKLP2
1	At1g32190	0.522	245784_at	alpha/beta-Hydrolases superfamily protein
1	At2g16440	0.522	263612_at	MCM4__Minichromosome maintenance (MCM2/3/5) family protein
1	At2g20240	0.522	265312_at	TRM17__Protein of unknown function (DUF3741)
1	At2g47900	0.522	266515_at	AtTLP3_TLP3__tubby like protein 3
1	At3g02820	0.522	258630_at	zinc knuckle (CCHC-type) family protein
1	At3g28560	0.522	256987_at	BCS1 AAA-type ATPase
1	At5g65440	0.522	247183_at
5	At4g39010	0.521	252930_at	AtGH9B18_GH9B18__glycosyl hydrolase 9B18
2	At4g15620	0.521	245501_at	Uncharacterised protein family (UPF0497)
2	At5g55660	0.521	248070_at	DEK domain-containing chromatin associated protein
1	At1g18450	0.521	261672_at	ARP4_ATARP4__actin-related protein 4
1	At4g26660	0.521	253978_at
3	At4g18540	0.52	254647_at
2	At2g01820	0.52	263590_at	Leucine-rich repeat protein kinase family protein
2	At3g47600	0.52	252408_at	ATMYB94_ATMYBCP70_MYB94__myb domain protein 94
1	At2g17730	0.52	264588_at	NIP2__NEP-interacting protein 2
1	At4g28220	0.52	253810_at	NDB1__NAD(P)H dehydrogenase B1
1	At5g61430	0.52	247519_at	ANAC100_ATNAC5_NAC100__NAC domain containing protein 100
4	At1g63690	0.519	260271_at	ATSPPL2_SPPL2__SIGNAL PEPTIDE PEPTIDASE-LIKE 2
2	At1g49480	0.519	262400_at	RTV1__related to vernalization1 1
2	At5g20830	0.519	245998_at	ASUS1_SUS1_atsus1__sucrose synthase 1
2	At5g54670	0.519	248150_at	ATK3_KATC__kinesin 3
1	At3g13640	0.519	256780_at	ABCE1_ATRLI1_RLI1__RNAse l inhibitor protein 1
1	At4g31880	0.519	253497_at
1	At5g20540	0.519	246085_at	ATBRXL4_BRX-LIKE4_BRXL4__BREVIS RADIX-like 4
2	At2g20595	0.518	263713_at
2	At2g22670	0.518	265319_at	IAA8__indoleacetic acid-induced protein 8
2	At3g62840	0.518	251184_at	Small nuclear ribonucleoprotein family protein
2	At5g38330	0.518	249560_at	LCR80__low-molecular-weight cysteine-rich 80
1	At1g30690	0.518	263226_at	Sec14p-like phosphatidylinositol transfer family protein
1	At1g61450	0.518	264763_at
1	At1g61870	0.518	264286_at	PPR336__pentatricopeptide repeat 336
1	At3g17680	0.518	258376_at	Kinase interacting (KIP1-like) family protein
1	At3g18960	0.518	256918_s_at	AP2/B3-like transcriptional factor family protein
1	At5g37890	0.518	249592_at	Protein with RING/U-box and TRAF-like domains
1	At5g55520	0.518	248057_at
5	At3g14380	0.517	258358_at	Uncharacterised protein family (UPF0497)
4	At3g26932	0.517	256980_at	DRB3__dsRNA-binding protein 3
2	At1g23205	0.517	264898_at	Plant invertase/pectin methylesterase inhibitor superfamily protein
2	At2g21655	0.517	263518_at	Protein of unknown function (DUF784)
2	At4g04460	0.517	255345_at	Saposin-like aspartyl protease family protein
1	At1g24764	0.517	245645_at	ATMAP70-2_MAP70-2__microtubule-associated proteins 70-2
1	At2g34650	0.517	266908_at	ABR_PID__Protein kinase superfamily protein
1	At3g23670	0.517	258098_at	KINESIN-12B_PAKRP1L__phragmoplast-associated kinesin-related protein, putative
1	At4g37210	0.517	246220_at	Tetratricopeptide repeat (TPR)-like superfamily protein
6	At4g24050	0.516	254175_at	NAD(P)-binding Rossmann-fold superfamily protein
3	At2g42540	0.516	263497_at	COR15_COR15A__cold-regulated 15a
3	At4g24130	0.516	254201_at	Protein of unknown function, DUF538
2	At5g43600	0.516	249103_at	ATAAH-2_UAH__ureidoglycolate amidohydrolase
1	At1g34355	0.516	259930_at	ATPS1_PS1__forkhead-associated (FHA) domain-containing protein
1	At2g25100	0.516	264381_at	Polynucleotidyl transferase, ribonuclease H-like superfamily protein
1	At3g09000	0.516	259216_at	BPP2__proline-rich family protein
1	At3g49080	0.516	252287_at	Ribosomal protein S5 domain 2-like superfamily protein
1	At5g13980	0.516	250203_at	Glycosyl hydrolase family 38 protein
1	At5g36710	0.516	249659_s_at
3	At5g51950	0.515	248368_at	Glucose-methanol-choline (GMC) oxidoreductase family protein
2	At2g03740	0.515	264039_at	late embryogenesis abundant domain-containing protein / LEA domain-containing protein
1	At1g28290	0.515	245688_at	AGP31__arabinogalactan protein 31
1	At1g47970	0.515	259617_at
1	At2g39510	0.515	266965_at	UMAMIT14__nodulin MtN21 /EamA-like transporter family protein
1	At3g10010	0.515	258931_at	DML2__demeter-like 2
1	At3g17350	0.515	258462_at
1	At4g28230	0.515	253804_at
1	At5g06670	0.515	250685_at	P-loop containing nucleoside triphosphate hydrolases superfamily protein
1	At5g12440	0.515	245183_at	CCCH-type zinc fingerfamily protein with RNA-binding domain
2	At4g35880	0.514	253107_at	Eukaryotic aspartyl protease family protein
1	At1g61010	0.514	259717_at	CPSF73-I__cleavage and polyadenylation specificity factor 73-I
1	At1g74300	0.514	260259_at	alpha/beta-Hydrolases superfamily protein
1	At3g13570	0.514	256649_at	At-SCL30A_SCL30A__SC35-like splicing factor 30A
1	At3g22310	0.514	258449_s_at	ATRH9_PMH1__putative mitochondrial RNA helicase 1
1	At3g61650	0.514	251331_s_at	TUBG1__gamma-tubulin
1	At3g63090	0.514	251206_at	Ubiquitin carboxyl-terminal hydrolase family protein
1	At5g63110	0.514	247371_at	ATHDA6_AXE1_HDA6_RPD3B_RTS1_SIL1__histone deacetylase 6
1	At5g67260	0.514	247034_at	CYCD3;2__CYCLIN D3;2
3	At1g71050	0.513	259753_at	HIPP20__Heavy metal transport/detoxification superfamily protein
1	At1g06990	0.513	256059_at	GDSL-like Lipase/Acylhydrolase superfamily protein
1	At1g07660	0.513	261408_s_at	Histone superfamily protein
1	At1g20590	0.513	259563_s_at	Cyclin family protein
1	At2g20300	0.513	265308_at	ALE2__Protein kinase superfamily protein
1	At3g15140	0.513	256858_at	Polynucleotidyl transferase, ribonuclease H-like superfamily protein
1	At4g24940	0.513	254084_at	AT-SAE1-1_ATSAE1A_SAE1A__SUMO-activating enzyme 1A
1	At5g48480	0.513	248710_at	Lactoylglutathione lyase / glyoxalase I family protein
4	At2g34810	0.512	267425_at	FAD-binding Berberine family protein
3	At3g52820	0.512	252006_at	ATPAP22_PAP22__purple acid phosphatase 22
2	At2g47470	0.512	245175_at	ATPDI11_ATPDIL2-1_MEE30_PDI11_UNE5__thioredoxin family protein
1	At2g23700	0.512	267284_at	Protein of unknown function, DUF547
1	At3g43610	0.512	246329_at	Spc97 / Spc98 family of spindle pole body (SBP) component
1	At4g00900	0.512	255647_at	ATECA2_ECA2__ER-type Ca2+-ATPase 2
2	At1g26540	0.511	261000_at	Agenet domain-containing protein
1	At1g52500	0.511	262129_at	ATFPG-1_ATFPG-2_ATMMH-1_ATMMH-2_FPG-1_FPG-2_MMH_MMH-1_MMH-2__MUTM homolog-1
1	At2g25060	0.511	264377_at	AtENODL14_ENODL14__early nodulin-like protein 14
1	At3g07610	0.511	259252_at	IBM1__Transcription factor jumonji (jmjC) domain-containing protein
1	At3g13960	0.511	258204_at	AtGRF5_GRF5__growth-regulating factor 5
1	At4g14720	0.511	245572_at	PPD2_TIFY4B__TIFY domain/Divergent CCT motif family protein
6	At1g68710	0.51	262275_at	ATPase E1-E2 type family protein / haloacid dehalogenase-like hydrolase family protein
3	At5g15210	0.51	250160_at	ATHB30_HB30_ZFHD3_ZHD8__homeobox protein 30
1	At1g32180	0.51	245785_at	ATCSLD6_CSLD6__cellulose synthase-like D6
1	At4g23440	0.51	254260_at	Disease resistance protein (TIR-NBS class)
1	At4g29680	0.51	253698_at	Alkaline-phosphatase-like family protein
1	At5g48600	0.51	248658_at	ATCAP-C_ATSMC3_ATSMC4_SMC3__structural maintenance of chromosome 3
3	At1g54020	0.509	263161_at	GDSL-like Lipase/Acylhydrolase superfamily protein
2	At1g21700	0.509	262484_at	ATSWI3C_CHB4_SWI3C__SWITCH/sucrose nonfermenting 3C
2	At1g76240	0.509	261772_at	Arabidopsis protein of unknown function (DUF241)
2	At2g07783	0.509	244912_at
2	At3g44250	0.509	252674_at	CYP71B38__cytochrome P450, family 71, subfamily B, polypeptide 38
2	At5g11360	0.509	250360_at	Interleukin-1 receptor-associated kinase 4 protein
1	At1g71260	0.509	259942_at	ATWHY2_WHY2__WHIRLY 2
1	At2g29890	0.509	263485_at	ATVLN1_VLN1__villin-like 1
1	At2g47620	0.509	245149_at	ATSWI3A_CHB1_SWI3A__SWITCH/sucrose nonfermenting 3A
1	At3g02210	0.509	259122_at	COBL1__COBRA-like protein 1 precursor
1	At3g05790	0.509	258741_at	LON4__lon protease 4
1	At4g17000	0.509	245461_at
1	At5g57700	0.509	247881_at	BNR/Asp-box repeat family protein
3	At5g42760	0.508	249191_at	Leucine carboxyl methyltransferase
2	At1g03710	0.508	264830_at	Cystatin/monellin superfamily protein
2	At1g06960	0.508	256052_at	RNA-binding (RRM/RBD/RNP motifs) family protein
2	At3g19550	0.508	256569_at
1	At1g13790	0.508	259448_at	FDM4__XH/XS domain-containing protein
1	At1g21560	0.508	260922_at
1	At1g67630	0.508	260192_at	EMB2814_POLA2__DNA polymerase alpha 2
1	At2g35530	0.508	266634_at	AtbZIP16_bZIP16__basic region/leucine zipper transcription factor 16
1	At3g19120	0.508	257036_at	PIF / Ping-Pong family of plant transposases
1	At4g00990	0.508	255656_at	Transcription factor jumonji (jmjC) domain-containing protein
1	At5g65860	0.508	247168_at	ankyrin repeat family protein
3	At5g13400	0.507	250261_at	Major facilitator superfamily protein
2	At1g20180	0.507	261243_at	Protein of unknown function (DUF677)
2	At3g22520	0.507	256932_at
1	At1g78430	0.507	260801_at	RIP4__ROP interactive partner 2
1	At2g44150	0.507	267184_at	ASHH3_SDG7__histone-lysine N-methyltransferase ASHH3
1	At3g48670	0.507	255566_s_at	IDN2_RDM12__XH/XS domain-containing protein
1	At3g58560	0.507	251581_at	DNAse I-like superfamily protein
1	At4g25550	0.507	245235_at	Cleavage/polyadenylation specificity factor, 25kDa subunit
1	At4g27330	0.507	253862_at	NZZ_SPL__sporocyteless (SPL)
2	At3g19570	0.506	257047_at	QWRF1_SCO3__Family of unknown function (DUF566)
2	At3g25810	0.506	257637_at	Terpenoid cyclases/Protein prenyltransferases superfamily protein
2	At5g40640	0.506	249368_at
1	At1g29980	0.506	260028_at	Protein of unknown function, DUF642
1	At1g57820	0.506	245828_at	ORTH2_VIM1__Zinc finger (C3HC4-type RING finger) family protein
1	At2g16780	0.506	265383_at	MSI02_MSI2_NFC02_NFC2__Transducin family protein / WD-40 repeat family protein
1	At2g28790	0.506	266223_at	Pathogenesis-related thaumatin superfamily protein
1	At3g52870	0.506	252014_at	IQ calmodulin-binding motif family protein
1	At5g04280	0.506	245714_at	AtRZ-1c_RZ-1c__RNA-binding (RRM/RBD/RNP motifs) family protein with retrovirus zinc finger-like domain
1	At5g17030	0.506	246419_at	UGT78D3__UDP-glucosyl transferase 78D3
2	At1g01630	0.505	261563_at	Sec14p-like phosphatidylinositol transfer family protein
1	At1g08470	0.505	261696_at	SSL3__strictosidine synthase-like 3
1	At1g75840	0.505	262729_at	ARAC5_ATGP3_ATROP4_ROP4__RAC-like GTP binding protein 5
1	At1g79720	0.505	261346_at	Eukaryotic aspartyl protease family protein
1	At3g18640	0.505	256853_at	Zinc finger C-x8-C-x5-C-x3-H type family protein
1	At4g22190	0.505	254356_at
1	At4g25240	0.505	254109_at	SKS1__SKU5 similar 1
1	At5g27220	0.505	246815_at	Frigida-like protein
1	At5g60150	0.505	247667_at
2	At4g30330	0.504	253607_at	Small nuclear ribonucleoprotein family protein
2	At5g14410	0.504	250189_at
1	At1g68060	0.504	260000_at	ATMAP70-1_MAP70-1__microtubule-associated proteins 70-1
1	At1g70830	0.504	262312_at	MLP28__MLP-like protein 28
1	At4g34160	0.504	253270_at	CYCD3_CYCD3;1__CYCLIN D3;1
1	At5g17160	0.504	246415_at
2	At3g18035	0.503	258141_at	HON4__winged-helix DNA-binding transcription factor family protein
2	At5g37300	0.503	249614_at	WSD1__O-acyltransferase (WSD1-like) family protein
1	At1g03830	0.503	265082_at	guanylate-binding family protein
1	At1g43190	0.503	264418_at	PTB3__polypyrimidine tract-binding protein 3
1	At1g55900	0.503	260596_at	EMB1860_TIM50__Haloacid dehalogenase-like hydrolase (HAD) superfamily protein
1	At3g57860	0.503	251608_at	GIG1_OSD1_UVI4-LIKE__UV-B-insensitive 4-like
1	At4g05190	0.503	255265_at	ATK5__kinesin 5
3	At1g04310	0.502	263653_at	ERS2__ethylene response sensor 2
2	At3g14520	0.502	258116_at	Terpenoid cyclases/Protein prenyltransferases superfamily protein
2	At5g10800	0.502	250447_at	RNA recognition motif (RRM)-containing protein
1	At1g53380	0.502	260613_at	Plant protein of unknown function (DUF641)
1	At3g50670	0.502	252182_at	U1-70K_U1SNRNP__U1 small nuclear ribonucleoprotein-70K
1	At5g08580	0.502	250540_at	Calcium-binding EF hand family protein
1	At5g16250	0.502	246505_at
1	At5g62710	0.502	247441_at	Leucine-rich repeat protein kinase family protein
5	At3g57800	0.501	251601_at	basic helix-loop-helix (bHLH) DNA-binding superfamily protein
3	At2g35060	0.501	267423_at	KUP11__K+ uptake permease 11
2	At3g52920	0.501	252023_at	Family of unknown function (DUF662)
2	At4g29700	0.501	253697_at	Alkaline-phosphatase-like family protein
2	At5g52860	0.501	248277_at	ABCG8__ABC-2 type transporter family protein
2	At5g54200	0.501	248198_at	Transducin/WD40 repeat-like superfamily protein
1	At1g04260	0.501	263660_at	MPI7_MPIP7_PRA1.D__CAMV movement protein interacting protein 7
1	At1g31310	0.501	262550_at	hydroxyproline-rich glycoprotein family protein
1	At1g77470	0.501	259732_at	EMB2810_RFC3_RFC5__replication factor C subunit 3
1	At2g24590	0.501	257435_at	At-RSZ22a_RSZ22a__RNA recognition motif and CCHC-type zinc finger domains containing protein
1	At3g52170	0.501	256675_at	DNA binding
1	At3g56120	0.501	251712_at	S-adenosyl-L-methionine-dependent methyltransferases superfamily protein
3	At2g44740	0.5	266873_at	CYCP4;1__cyclin p4;1
3	At4g13210	0.5	254754_at	Pectin lyase-like superfamily protein
3	At4g38950	0.5	252916_at	ATP binding microtubule motor family protein
1	At5g04200	0.5	245697_at	AtMC9_AtMCP2f_MC9_MCP2f__metacaspase 9

## Sheet: List of Best 25 ID per bait
List of the Best 25 genes co-expressed with each ABCE MADS-box genes (bait) in Arabidopsis thaliana
Bait	AGI-ID	Number of corresponding Grevillea j. contig	annotation
AP1	At1g69120	1	AGL7_AP1_AtAP1__K-box region and MADS-box transcription factor family protein
AP1	At3g28500	0	60S acidic ribosomal protein family
AP1	At2g19170	2	SLP3__subtilisin-like serine protease 3
AP1	At1g75090	1	DNA glycosylase superfamily protein
AP1	At5g23940	4	DCR_EMB3009_PEL3__HXXXD-type acyl-transferase family protein
AP1	At5g20740	1	Plant invertase/pectin methylesterase inhibitor superfamily protein
AP1	At3g15270	0	SPL5__squamosa promoter binding protein-like 5
AP1	At3g06220	0	AP2/B3-like transcriptional factor family protein
AP1	At2g42200	5	AtSPL9_SPL9__squamosa promoter binding protein-like 9
AP1	At4g30130	2	Protein of unknown function (DUF630 and DUF632)
AP1	At2g45650	2	AGL6_RSB1__AGAMOUS-like 6
AP1	At4g29030	0	Putative membrane lipoprotein
AP1	At4g24670	2	TAR2__tryptophan aminotransferase related 2
AP1	At1g02190	1	Fatty acid hydroxylase superfamily
AP1	At3g56370	2	Leucine-rich repeat protein kinase family protein
AP1	At5g11550	1	ARM repeat superfamily protein
AP1	At1g64450	1	Glycine-rich protein family
AP1	At3g57920	0	SPL15__squamosa promoter binding protein-like 15
AP1	At3g61310	0	AHL11__AT hook motif DNA-binding family protein
AP1	At2g32765	0	ATSUMO5_SUM5_SUMO5__small ubiquitinrelated modifier 5
AP1	At1g14440	1	AtHB31_FTM2_HB31_ZHD4__homeobox protein 31
AP1	At5g08000	0	E13L3_PDCB2__glucan endo-1,3-beta-glucosidase-like protein 3
AP1	At5g08640	3	ATFLS1_FLS_FLS1__flavonol synthase 1
AP1	At2g33810	1	SPL3__squamosa promoter binding protein-like 3
AP1	At3g02640	0
AP1	At4g03210	3	XTH9__xyloglucan endotransglucosylase/hydrolase 9
PI	At5g20240	6	PI__K-box region and MADS-box transcription factor family protein
PI	At3g54340	0	AP3_ATAP3__K-box region and MADS-box transcription factor family protein
PI	At1g59640	2	BPE_BPEp_BPEub_ZCW32__BIG PETAL P
PI	At3g01980	1	NAD(P)-binding Rossmann-fold superfamily protein
PI	At1g35170	0	TRAM, LAG1 and CLN8 (TLC) lipid-sensing domain containing protein
PI	At2g38110	4	ATGPAT6_GPAT6__glycerol-3-phosphate acyltransferase 6
PI	At5g40350	3	AtMYB24_MYB24__myb domain protein 24
PI	At1g75300	0	NmrA-like negative transcriptional regulator family protein
PI	At1g61680	7	ATTPS14_TPS14__terpene synthase 14
PI	At4g13790	0	SAUR25__SAUR-like auxin-responsive protein family
PI	At4g32460	0	Protein of unknown function, DUF642
PI	At2g42900	3	Plant basic secretory protein (BSP) family protein
PI	At2g24210	1	TPS10__terpene synthase 10
PI	At1g22380	11	AtUGT85A3_UGT85A3__UDP-glucosyl transferase 85A3
PI	At3g20820	4	Leucine-rich repeat (LRR) family protein
PI	At1g12080	0	Vacuolar calcium-binding protein-related
PI	At1g55260	0	LTPG6__Bifunctional inhibitor/lipid-transfer protein/seed storage 2S albumin superfamily protein
PI	At1g35310	0	MLP168__MLP-like protein 168
PI	At3g27810	0	ATMYB21_ATMYB3_MYB21__myb domain protein 21
PI	At3g55290	6	SDRd__NAD(P)-binding Rossmann-fold superfamily protein
PI	At4g16590	0	ATCSLA01_ATCSLA1_CSLA01__cellulose synthase-like A01
PI	At1g16705	0	p300/CBP acetyltransferase-related protein-related
PI	At1g23060	0	MDP40__
PI	At2g45580	0	CYP76C3__cytochrome P450, family 76, subfamily C, polypeptide 3
PI	At5g45950	0	GDSL-like Lipase/Acylhydrolase superfamily protein
PI	At2g17880	2	DJC24__Chaperone DnaJ-domain superfamily protein
AP3	At1g22380	11	AtUGT85A3_UGT85A3__UDP-glucosyl transferase 85A3
AP3	At1g61680	7	ATTPS14_TPS14__terpene synthase 14
AP3	At5g20240	6	PI__K-box region and MADS-box transcription factor family protein
AP3	At2g38110	4	ATGPAT6_GPAT6__glycerol-3-phosphate acyltransferase 6
AP3	At3g20820	4	Leucine-rich repeat (LRR) family protein
AP3	At5g40350	3	AtMYB24_MYB24__myb domain protein 24
AP3	At2g42900	3	Plant basic secretory protein (BSP) family protein
AP3	At4g22730	3	Leucine-rich repeat protein kinase family protein
AP3	At1g59640	2	BPE_BPEp_BPEub_ZCW32__BIG PETAL P
AP3	At1g24260	2	AGL9_SEP3__K-box region and MADS-box transcription factor family protein
AP3	At1g21460	2	AtSWEET1_SWEET1__Nodulin MtN3 family protein
AP3	At3g01980	1	NAD(P)-binding Rossmann-fold superfamily protein
AP3	At2g20870	1	cell wall protein precursor, putative
AP3	At3g54340	0	AP3_ATAP3__K-box region and MADS-box transcription factor family protein
AP3	At1g16705	0	p300/CBP acetyltransferase-related protein-related
AP3	At1g35170	0	TRAM, LAG1 and CLN8 (TLC) lipid-sensing domain containing protein
AP3	At4g16590	0	ATCSLA01_ATCSLA1_CSLA01__cellulose synthase-like A01
AP3	At4g32460	0	Protein of unknown function, DUF642
AP3	At1g70720	0	Plant invertase/pectin methylesterase inhibitor superfamily protein
AP3	At1g75300	0	NmrA-like negative transcriptional regulator family protein
AP3	At1g23060	0	MDP40__
AP3	At1g55260	0	LTPG6__Bifunctional inhibitor/lipid-transfer protein/seed storage 2S albumin superfamily protein
AP3	At3g27810	0	ATMYB21_ATMYB3_MYB21__myb domain protein 21
AP3	At1g12080	0	Vacuolar calcium-binding protein-related
AP3	At3g10570	0	CYP77A6__cytochrome P450, family 77, subfamily A, polypeptide 6
AP3	At1g35310	0	MLP168__MLP-like protein 168
AG	At4g18960	1	AG__K-box region and MADS-box transcription factor family protein
AG	At5g59120	1	ATSBT4.13_SBT4.13__subtilase 4.13
AG	At5g15800	0	AGL2_SEP1__K-box region and MADS-box transcription factor family protein
AG	At4g12410	0	SAUR35__SAUR-like auxin-responsive protein family
AG	At3g04960	0	Domain of unknown function (DUF3444)
AG	At4g21590	0	ENDO3__endonuclease 3
AG	At2g28470	2	BGAL8__beta-galactosidase 8
AG	At5g24580	0	Heavy metal transport/detoxification superfamily protein
AG	At5g53190	9	AtSWEET3_SWEET3__Nodulin MtN3 family protein
AG	At3g02310	4	AGL4_SEP2__K-box region and MADS-box transcription factor family protein
AG	At5g07510	0	ATGRP-4_ATGRP14_GRP-4_GRP14__glycine-rich protein 14
AG	At5g07530	0	ATGRP-7_ATGRP17_GRP17__glycine rich protein 17
AG	At1g61110	0	NAC025_anac025__NAC domain containing protein 25
AG	At1g75930	0	EXL6__extracellular lipase 6
AG	At5g07520	0	ATGRP-8_ATGRP18_GRP18__glycine-rich protein 18
AG	At5g02190	1	ATASP38_EMB24_PCS1__Eukaryotic aspartyl protease family protein
AG	At2g23800	1	GGPS2_GGPS5__geranylgeranyl pyrophosphate synthase 2
AG	At5g07550	0	ATGRP19_GRP19__glycine-rich protein 19
AG	At5g61605	0
AG	At1g23570	0	Domain of unknown function (DUF220)
AG	At1g24260	2	AGL9_SEP3__K-box region and MADS-box transcription factor family protein
AG	At3g52810	0	ATPAP21_PAP21__purple acid phosphatase 21
AG	At5g07560	0	ATGRP20_GRP20__glycine-rich protein 20
AG	At1g23240	0	Caleosin-related family protein
AG	At5g07540	0	ATGRP-6_ATGRP16_GRP16__glycine-rich protein 16
AG	At3g15400	0	ATA20__anther 20
SEP1	At5g15800	0	AGL2_SEP1__K-box region and MADS-box transcription factor family protein
SEP1	At3g02310	4	AGL4_SEP2__K-box region and MADS-box transcription factor family protein
SEP1	At1g05490	1	chr31__chromatin remodeling 31
SEP1	At3g04960	0	Domain of unknown function (DUF3444)
SEP1	At5g02190	1	ATASP38_EMB24_PCS1__Eukaryotic aspartyl protease family protein
SEP1	At4g21590	0	ENDO3__endonuclease 3
SEP1	At2g42830	0	AGL5_SHP2__K-box region and MADS-box transcription factor family protein
SEP1	At1g72260	0	THI2.1_THI2.1.1__thionin 2.1
SEP1	At4g09960	2	AGL11_STK__K-box region and MADS-box transcription factor family protein
SEP1	At5g42230	0	scpl41__serine carboxypeptidase-like 41
SEP1	At4g18960	1	AG__K-box region and MADS-box transcription factor family protein
SEP1	At5g60140	0	AP2/B3-like transcriptional factor family protein
SEP1	At5g48880	0	KAT5_PKT1_PKT2__peroxisomal 3-keto-acyl-CoA thiolase 2
SEP1	At3g14395	0
SEP1	At4g12960	0	AtGILT_GILT__Gamma interferon responsive lysosomal thiol (GILT) reductase family protein
SEP1	At4g15440	1	CYP74B2_HPL1__hydroperoxide lyase 1
SEP1	At1g24260	2	AGL9_SEP3__K-box region and MADS-box transcription factor family protein
SEP1	At1g21460	2	AtSWEET1_SWEET1__Nodulin MtN3 family protein
SEP1	At3g46770	0	AP2/B3-like transcriptional factor family protein
SEP1	At4g12890	0	Gamma interferon responsive lysosomal thiol (GILT) reductase family protein
SEP1	At4g00870	0	basic helix-loop-helix (bHLH) DNA-binding superfamily protein
SEP1	At1g24540	1	CYP86C1__cytochrome P450, family 86, subfamily C, polypeptide 1
SEP1	At1g27360	0	SPL11__squamosa promoter-like 11
SEP1	At2g28470	2	BGAL8__beta-galactosidase 8
SEP1	At5g21150	1	AGO9__Argonaute family protein
SEP1	At5g09730	0	ATBX3_ATBXL3_BX3_BXL3_XYL3__beta-xylosidase 3
SEP2	At3g02310	4	AGL4_SEP2__K-box region and MADS-box transcription factor family protein
SEP2	At5g15800	0	AGL2_SEP1__K-box region and MADS-box transcription factor family protein
SEP2	At3g04960	0	Domain of unknown function (DUF3444)
SEP2	At1g27360	0	SPL11__squamosa promoter-like 11
SEP2	At5g48880	0	KAT5_PKT1_PKT2__peroxisomal 3-keto-acyl-CoA thiolase 2
SEP2	At4g21590	0	ENDO3__endonuclease 3
SEP2	At5g02190	1	ATASP38_EMB24_PCS1__Eukaryotic aspartyl protease family protein
SEP2	At2g28470	2	BGAL8__beta-galactosidase 8
SEP2	At1g24260	2	AGL9_SEP3__K-box region and MADS-box transcription factor family protein
SEP2	At1g05490	1	chr31__chromatin remodeling 31
SEP2	At4g09960	2	AGL11_STK__K-box region and MADS-box transcription factor family protein
SEP2	At4g14695	0	Uncharacterised protein family (UPF0041)
SEP2	At2g45650	2	AGL6_RSB1__AGAMOUS-like 6
SEP2	At4g00870	0	basic helix-loop-helix (bHLH) DNA-binding superfamily protein
SEP2	At5g37020	4	ARF8_ATARF8__auxin response factor 8
SEP2	At1g27370	0	SPL10__squamosa promoter binding protein-like 10
SEP2	At5g07990	10	CYP75B1_D501_TT7__Cytochrome P450 superfamily protein
SEP2	At3g14395	0
SEP2	At5g42230	0	scpl41__serine carboxypeptidase-like 41
SEP2	At2g42830	0	AGL5_SHP2__K-box region and MADS-box transcription factor family protein
SEP2	At5g60140	0	AP2/B3-like transcriptional factor family protein
SEP2	At1g16705	0	p300/CBP acetyltransferase-related protein-related
SEP2	At3g22840	3	ELIP_ELIP1__Chlorophyll A-B binding family protein
SEP2	At1g77610	4	EamA-like transporter family protein
SEP2	At4g21480	0	STP12__sugar transporter protein 12
SEP2	At5g39220	0	alpha/beta-Hydrolases superfamily protein
SEP3	At1g24260	2	AGL9_SEP3__K-box region and MADS-box transcription factor family protein
SEP3	At1g78960	6	ATLUP2_LUP2__lupeol synthase 2
SEP3	At4g01080	0	TBL26__TRICHOME BIREFRINGENCE-LIKE 26
SEP3	At1g02190	1	Fatty acid hydroxylase superfamily
SEP3	At3g03450	1	RGL2__RGA-like 2
SEP3	At3g10570	0	CYP77A6__cytochrome P450, family 77, subfamily A, polypeptide 6
SEP3	At1g16705	0	p300/CBP acetyltransferase-related protein-related
SEP3	At1g66350	0	RGL_RGL1__RGA-like 1
SEP3	At2g38110	4	ATGPAT6_GPAT6__glycerol-3-phosphate acyltransferase 6
SEP3	At4g14695	0	Uncharacterised protein family (UPF0041)
SEP3	At5g35670	1	iqd33__IQ-domain 33
SEP3	At5g33370	5	GDSL-like Lipase/Acylhydrolase superfamily protein
SEP3	At2g20870	1	cell wall protein precursor, putative
SEP3	At3g04960	0	Domain of unknown function (DUF3444)
SEP3	At5g22430	3	Pollen Ole e 1 allergen and extensin family protein
SEP3	At1g58430	0	RXF26__GDSL-like Lipase/Acylhydrolase family protein
SEP3	At4g16590	0	ATCSLA01_ATCSLA1_CSLA01__cellulose synthase-like A01
SEP3	At5g23970	0	HXXXD-type acyl-transferase family protein
SEP3	At4g19430	0
SEP3	At5g48880	0	KAT5_PKT1_PKT2__peroxisomal 3-keto-acyl-CoA thiolase 2
SEP3	At2g28470	2	BGAL8__beta-galactosidase 8
SEP3	At5g18000	1	VDD__VERDANDI
SEP3	At5g15800	0	AGL2_SEP1__K-box region and MADS-box transcription factor family protein
SEP3	At4g20320	0	CTP synthase family protein
SEP3	At3g02310	4	AGL4_SEP2__K-box region and MADS-box transcription factor family protein
SEP3	At4g00870	0	basic helix-loop-helix (bHLH) DNA-binding superfamily protein

## Sheet: Grevillea homologs list
AGI ID list of floral genes co-expressed with ABCE MADS-box genes in Arabidopsis thaliana with their homolog contigs expressed in Grevillea juniperina
AGI-ID	Occurrence frequency	Best r-value to Bait	Grevillea j. contig identifier	pident	length	mismatch	gapopen	qstart	qend	sstart	send	evalue	bitscore	qlen	slen	qcovs	qcovhsp
AT1G24260	7	1	evgtrinTRINITY_DN65624c0_g2_i12	70.54	224	62	3	1	222	1	222	2e-100	296	229	250	97	97
AT1G24260	7	1	evgtrinTRINITY_DN65624c0_g2_i10	71.12	187	52	2	1	186	1	186	1e-86	259	190	250	98	98
AT3G02310	6	1	evgtrinTRINITY_DN68034c0_g1_i3	67.2	250	69	5	1	237	1	250	8e-112	325	237	250	100	100
AT4G18960	6	1	evgtrinTRINITY_DN70742c0_g2_i1	70.09	234	60	5	2	225	18	251	6e-110	320	226	252	99	99
AT3G02310	6	1	evgtrinTRINITY_DN68034c0_g1_i12	65.08	252	80	6	1	246	1	250	1e-107	315	246	250	100	100
AT3G02310	6	1	evgtrinTRINITY_DN68034c0_g1_i11	69.16	214	55	3	1	203	1	214	6e-100	294	204	250	99	99
AT5G20240	6	1	evgtrinTRINITY_DN64676c2_g1_i8	54.81	208	85	3	1	207	1	200	9e-77	233	209	208	99	99
AT5G20240	6	1	evgtrinTRINITY_DN70596c1_g1_i6	56.98	179	76	1	1	179	1	178	9e-69	212	187	208	96	96
AT5G20240	6	1	evgtrinTRINITY_DN71960c1_g1_i7	54.8	177	74	2	1	173	26	200	1e-63	199	175	208	99	99
AT5G20240	6	1	evgtrinTRINITY_DN71960c1_g1_i23	54.01	187	73	3	1	183	23	200	3e-63	198	185	208	99	99
AT3G02310	6	1	evgvelvLoc47722t7	41.67	228	104	8	4	215	36	250	3e-43	149	215	250	99	99
AT5G20240	6	1	evgvelvLoc1566t7	45.86	157	75	4	1	157	54	200	7e-38	132	159	208	99	99
AT5G20240	6	1	evgvelvLoc1566t8	47.29	129	62	1	1	129	54	176	6e-33	119	161	208	80	80
AT1G69120	5	1	evgtrinTRINITY_DN66620c0_g1_i7	74.3	179	46	0	1	179	1	179	1e-92	274	192	234	93	93
AT1G78960	6	0.849	evgtrinTRINITY_DN75597c3_g1_i6utrorf	62.29	297	109	2	12	307	72	366	8e-132	392	307	612	96	96
AT1G78960	6	0.849	evgtrinTRINITY_DN75597c3_g1_i6	66.15	260	86	2	1	259	1	259	3e-121	368	278	763	93	93
AT1G78960	6	0.849	evgtrinTRINITY_DN56201c0_g1_i1	65.73	143	49	0	1	143	82	224	3e-63	208	143	738	100	100
AT1G78960	6	0.849	evgtrinTRINITY_DN56201c0_g1_i2	66.43	143	48	0	1	143	82	224	4e-62	205	143	738	100	100
AT1G78960	6	0.849	evgvelvLoc102894d562074t1	65.22	92	32	0	2	93	284	375	1e-39	139	103	612	89	89
AT1G78960	6	0.849	evgvelvLoc159072d199496t1	75.86	58	14	0	3	60	516	573	1e-24	99	108	612	54	54
AT1G59640	4	0.843	evgtrinTRINITY_DN71049c0_g1_i3	53.22	295	105	10	1	293	1	264	7e-88	267	293	264	100	100
AT1G59640	4	0.843	evgtrinTRINITY_DN71049c0_g1_i9	51.18	297	110	10	1	295	1	264	1e-79	246	295	264	100	100
AT1G02190	7	0.823	evgtrinTRINITY_DN71854c0_g6_i1	59.91	232	90	1	1	232	1	229	7e-88	276	233	627	99	99
AT3G03450	6	0.823	evgtrinTRINITY_DN58179c0_g1_i2	34.41	279	141	8	47	316	46	291	2e-37	141	317	547	85	85
AT1G05490	7	0.804	evgtrinTRINITY_DN73293c0_g1_i2	44.64	784	379	16	198	931	611	1389	0	649	938	1410	78	78
AT2G38110	6	0.789	evgtrinTRINITY_DN69360c1_g1_i2	78.18	495	105	1	4	495	7	501	0	773	507	501	97	97
AT2G38110	6	0.789	evgtrinTRINITY_DN67446c1_g1_i4	79.66	236	45	1	1	233	140	375	6e-123	362	233	501	100	100
AT2G38110	6	0.789	evgtrinTRINITY_DN69360c1_g2_i2	87.82	156	19	0	1	156	345	500	2e-96	291	157	501	99	99
AT2G38110	6	0.789	evgtrinTRINITY_DN69360c0_g1_i1	72.67	150	41	0	3	152	6	155	4e-74	233	152	501	99	99
AT5G02190	4	0.788	evgtrinTRINITY_DN58919c1_g1_i1	68.87	212	62	2	7	215	242	452	5e-101	304	216	453	97	97
AT3G01980	4	0.779	evgtrinTRINITY_DN69627c3_g1_i8	53.18	267	124	1	1	267	1	266	6e-103	305	267	266	100	100
AT5G59120	4	0.763	evgvelvLoc350104t1	53.49	43	20	0	1	43	687	729	5e-07	45.8	44	732	98	98
AT5G35670	6	0.762	evgtrinTRINITY_DN66083c0_g2_i6	43.09	369	140	12	1	309	1	359	1e-73	238	341	442	91	91
AT5G33370	6	0.756	evgtrinTRINITY_DN61976c0_g2_i3	68.59	347	108	1	15	361	19	364	0	511	370	366	94	94
AT5G33370	6	0.756	evgtrinTRINITY_DN74532c0_g2_i2	68.7	230	71	1	1	230	136	364	5e-120	351	239	366	96	96
AT5G33370	6	0.756	evgtrinTRINITY_DN60203c1_g1_i1	71.15	208	58	1	1	208	156	361	1e-107	318	211	366	99	99
AT5G33370	6	0.756	evgvelvLoc2239d255002t1	64.54	141	49	1	1	141	225	364	7e-65	206	150	366	94	94
AT5G33370	6	0.756	evgvelvLoc247212t1	51.83	164	48	6	1	164	232	364	6e-46	157	173	366	95	95
AT2G20870	5	0.755	evgtrinTRINITY_DN59856c0_g1_i1	40.62	96	51	3	30	123	29	120	4e-11	57.8	137	140	69	69
AT5G22430	5	0.75	evgtrinTRINITY_DN58040c0_g1_i3	40.59	170	84	6	66	232	17	172	1e-28	109	232	172	72	72
AT5G22430	5	0.75	evgvelvLoc5409t3	38.74	111	48	2	10	116	45	139	1e-12	63.5	179	172	60	60
AT5G22430	5	0.75	evgvelvLoc1518t5	33.75	80	45	3	13	92	86	157	2e-05	41.6	102	172	78	78
AT4G09960	4	0.75	evgtrinTRINITY_DN62265c0_g1_i1	66.52	230	71	2	1	224	2	231	2e-103	303	224	231	100	100
AT4G09960	4	0.75	evgtrinTRINITY_DN62265c0_g2_i1	66.09	230	72	2	1	224	1	230	4e-103	302	224	230	100	100
AT5G40350	5	0.747	evgtrinTRINITY_DN65926c1_g1_i1	61.11	216	60	6	1	196	1	212	2e-81	245	197	214	99	99
AT5G40350	5	0.747	evgtrinTRINITY_DN65926c1_g3_i1	57.08	212	72	2	1	193	1	212	8e-78	236	195	214	99	99
AT5G40350	5	0.747	evgtrinTRINITY_DN28951c0_g1_i1	85.26	95	14	0	24	118	1	95	5e-54	172	118	214	81	81
AT2G19170	6	0.742	evgtrinTRINITY_DN73653c1_g2_i2	78.39	796	171	1	20	814	19	814	0	1298	815	815	98	98
AT2G19170	6	0.742	evgvelvLoc27681t1	69.77	43	11	1	4	46	82	122	2e-14	70.1	104	815	41	41
AT1G75090	6	0.738	evgtrinTRINITY_DN61993c0_g1_i2	63.03	211	73	2	113	318	110	320	6e-104	312	333	329	62	62
AT2G28470	4	0.735	evgtrinTRINITY_DN72143c0_g2_i1	71.46	827	229	3	30	852	29	852	0	1261	852	852	97	97
AT2G28470	4	0.735	evgvelvLoc103821d43244t1	43.33	90	41	3	1	88	696	777	7e-14	68.6	112	846	79	79
AT1G61680	2	0.734	evgtrinTRINITY_DN70425c1_g1_i16	44.21	527	280	5	49	566	48	569	7e-163	481	572	569	91	91
AT1G61680	2	0.734	evgtrinTRINITY_DN63915c0_g4_i6	45.98	522	267	6	33	546	55	569	3e-155	461	552	569	93	93
AT1G61680	2	0.734	evgvelvLoc23519d108350t1	47.36	397	203	4	3	397	170	562	4e-127	382	403	562	98	98
AT1G61680	2	0.734	evgtrinTRINITY_DN63915c0_g3_i1	55.06	158	71	0	1	158	273	430	1e-61	202	158	562	100	100
AT1G61680	2	0.734	evgtrinTRINITY_DN70378c0_g2_i3	38.27	196	120	1	1	196	358	552	4e-45	159	213	562	92	92
AT1G61680	2	0.734	evgtrinTRINITY_DN70378c0_g3_i2	32.86	210	131	6	1	208	1	202	3e-23	98.6	217	569	96	96
AT1G61680	2	0.734	evgtrinTRINITY_DN70378c0_g3_i3	32.84	204	127	6	1	202	1	196	9e-22	94	202	569	100	100
AT5G23940	7	0.733	evgtrinTRINITY_DN71634c2_g2_i5	58.57	449	169	6	80	513	3	449	0	524	515	484	84	84
AT5G23940	7	0.733	evgtrinTRINITY_DN71634c2_g2_i8	58.2	445	169	6	85	514	7	449	5e-178	514	516	484	83	83
AT5G23940	7	0.733	evgtrinTRINITY_DN71634c2_g1_i2	64.81	270	92	2	1	267	180	449	9e-121	358	268	484	99	99
AT5G23940	7	0.733	evgtrinTRINITY_DN60837c1_g1_i1	52.55	196	83	3	18	203	3	198	8e-61	200	203	484	92	92
AT5G18000	4	0.727	evgvelvLoc113408d172592t1	32.81	64	43	0	43	106	1	64	1e-06	45.8	107	272	60	60
AT4G15440	4	0.723	evgtrinTRINITY_DN67817c0_g3_i2	59.38	384	155	1	111	493	1	384	1e-176	506	493	384	78	78
AT1G21460	6	0.719	evgtrinTRINITY_DN75290c1_g4_i3	68	250	74	2	1	250	1	244	2e-118	343	253	247	99	99
AT1G21460	6	0.719	evgvelvLoc127623t2	72.88	118	32	0	1	118	1	118	9e-57	180	119	247	99	99
AT2G42900	6	0.717	evgtrinTRINITY_DN57174c0_g1_i1	43.26	178	95	3	14	186	12	188	3e-41	143	186	276	93	93
AT2G42900	6	0.717	evgvelvLoc158645d60524t1	38.66	119	69	3	1	115	44	162	4e-20	84	116	276	99	99
AT2G42900	6	0.717	evgtrinTRINITY_DN53822c0_g1_i2	48.89	45	21	2	34	77	205	248	5e-05	41.6	119	276	37	37
AT5G20740	5	0.717	evgtrinTRINITY_DN69427c1_g2_i2	48.17	191	89	5	61	246	14	199	3e-52	172	246	205	76	76
AT2G24210	2	0.716	evgvelvLoc109684d568884t1	47	200	99	4	3	200	396	590	1e-49	172	204	591	97	97
AT5G45960	5	0.712	evgtrinTRINITY_DN63347c0_g1_i1	53.45	333	152	2	21	351	41	372	1e-132	388	355	375	93	93
AT5G45960	5	0.712	evgtrinTRINITY_DN63347c0_g1_i3	53.45	333	152	2	21	351	41	372	7e-131	383	355	375	93	93
AT1G24540	3	0.712	evgtrinTRINITY_DN54900c0_g1_i1	61.06	226	87	1	4	229	296	520	8e-97	296	236	522	96	96
AT1G22380	2	0.709	evgtrinTRINITY_DN70621c0_g1_i4	57.59	481	200	3	13	490	3	482	0	590	500	488	96	96
AT1G22380	2	0.709	evgtrinTRINITY_DN71981c1_g3_i4	58.77	473	192	2	9	478	10	482	0	607	484	488	97	97
AT1G22380	2	0.709	evgtrinTRINITY_DN71981c1_g3_i7	58.35	473	194	2	9	478	10	482	0	597	480	488	98	98
AT1G22380	2	0.709	evgtrinTRINITY_DN71981c1_g3_i8	58.14	473	195	2	9	478	10	482	0	606	484	488	97	97
AT1G22380	2	0.709	evgtrinTRINITY_DN68450c1_g3_i1	56.67	360	154	2	1	358	129	488	2e-156	453	361	488	99	99
AT1G22380	2	0.709	evgtrinTRINITY_DN68450c1_g3_i2	56.67	360	154	2	1	358	129	488	3e-155	450	361	488	99	99
AT1G22380	2	0.709	evgvelvLoc73495t1	57.78	315	130	2	12	323	168	482	9e-134	394	329	488	95	95
AT1G22380	2	0.709	evgvelvLoc73495t2	59.19	272	109	1	12	281	168	439	5e-119	354	281	488	96	96
AT1G22380	2	0.709	evgvelvLoc1196t2	48.39	93	37	1	1	93	396	477	2e-23	95.5	119	488	78	78
AT1G22380	2	0.709	evgvelvLoc1196t3	44.33	97	39	1	1	97	396	477	2e-20	87	123	488	79	79
AT1G22380	2	0.709	evgvelvLoc170423t1	41.77	79	35	3	1	79	1	68	1e-08	53.1	134	488	59	59
AT5G21150	4	0.708	evgvelvLoc57562d310031t1	60.48	124	46	1	1	124	126	246	2e-44	156	124	896	100	100
AT2G27920	4	0.707	evgtrinTRINITY_DN71404c1_g1_i2	65.2	431	143	5	33	458	31	459	0	578	462	461	92	92
AT2G27920	4	0.707	evgtrinTRINITY_DN71404c1_g1_i5	60.72	415	156	5	1	410	47	459	0	517	414	461	99	99
AT2G27920	4	0.707	evgvelvLoc16848t3	55.26	76	33	1	3	78	297	371	8e-23	92.4	114	389	67	67
AT3G20820	6	0.705	evgtrinTRINITY_DN69013c0_g2_i1	69.19	344	105	1	25	368	20	362	7e-176	498	368	365	93	93
AT3G20820	6	0.705	evgvelvLoc12175d467062t1	67.61	142	46	0	1	142	43	184	2e-66	209	142	365	100	100
AT3G20820	6	0.705	evgvelvLoc12306t2	45.36	183	58	2	6	146	82	264	1e-38	137	154	365	92	92
AT3G20820	6	0.705	evgvelvLoc47073d299815t1	40.62	64	36	2	27	88	14	77	4e-08	50.8	115	365	54	54
AT2G42200	5	0.703	evgtrinTRINITY_DN72208c1_g2_i1	42.04	333	141	13	18	327	72	375	2e-56	190	327	375	95	95
AT2G42200	5	0.703	evgtrinTRINITY_DN72208c1_g3_i10	57.42	155	45	2	26	178	32	167	3e-45	157	203	375	75	75
AT2G42200	5	0.703	evgtrinTRINITY_DN45146c0_g1_i2	75.86	29	7	0	88	116	92	120	2e-08	52	128	375	23	23
AT2G42200	5	0.703	evgtrinTRINITY_DN72208c0_g1_i1	31.55	187	91	10	38	204	206	375	2e-05	44.7	204	375	82	82
AT2G42200	5	0.703	evgtrinTRINITY_DN72208c0_g1_i2	31.02	187	92	10	38	204	206	375	0.0001	42.7	204	375	82	82
AT4G30130	2	0.698	evgtrinTRINITY_DN64592c0_g3_i5	49.04	471	181	14	1	451	1	432	4e-115	353	452	547	99	99
AT4G30130	2	0.698	evgvelvLoc149917d608893t1	42.55	141	58	7	3	139	70	191	3e-21	90.5	141	547	97	97
AT3G11480	4	0.697	evgtrinTRINITY_DN68125c0_g1_i10	43.65	307	154	5	1	300	85	379	3e-80	251	300	379	100	100
AT3G11480	4	0.697	evgtrinTRINITY_DN60533c0_g1_i6	46.47	241	120	2	1	240	147	379	3e-67	216	240	379	100	100
AT3G11480	4	0.697	evgtrinTRINITY_DN48998c0_g2_i2	39.87	158	80	5	1	156	235	379	7e-28	107	156	379	100	100
AT2G45650	7	0.696	evgtrinTRINITY_DN63715c0_g2_i6	72.73	176	48	0	1	176	1	176	2e-87	261	176	252	100	100
AT2G45650	7	0.696	evgvelvLoc50676d508567t2	45.13	195	94	3	4	186	1	194	1e-46	157	193	252	95	95
AT5G15310	3	0.696	evgtrinTRINITY_DN66618c0_g3_i1	36.16	271	99	9	1	260	40	247	2e-31	119	260	247	100	100
AT2G42990	4	0.694	evgvelvLoc136993t1	64.6	113	39	1	105	217	125	236	5e-44	153	217	350	52	52
AT5G07990	5	0.692	evgtrinTRINITY_DN62796c0_g1_i2	47.06	510	258	7	6	506	3	509	9e-176	509	507	513	99	99
AT5G07990	5	0.692	evgtrinTRINITY_DN68976c1_g2_i2	69.07	333	92	4	1	331	186	509	2e-164	473	336	513	99	99
AT5G07990	5	0.692	evgtrinTRINITY_DN69661c0_g4_i2	42.18	505	274	7	18	510	11	509	3e-143	426	511	513	96	96
AT5G07990	5	0.692	evgtrinTRINITY_DN70058c0_g1_i2	40.28	509	291	6	13	514	7	509	2e-131	396	515	513	97	97
AT5G07990	5	0.692	evgtrinTRINITY_DN69661c0_g2_i1	39.57	508	294	6	10	507	4	508	3e-129	390	510	513	98	98
AT5G07990	5	0.692	evgvelvLoc90059d156723t1	61.15	296	99	4	1	295	186	466	4e-122	366	355	513	83	83
AT5G07990	5	0.692	evgtrinTRINITY_DN68976c1_g2_i3	64.75	244	76	5	4	245	6	241	3e-107	323	245	513	99	99
AT5G07990	5	0.692	evgtrinTRINITY_DN70058c0_g1_i4	38.59	412	244	5	13	421	7	412	3e-95	299	421	513	97	97
AT5G07990	5	0.692	evgvelvLoc54841t2	34.01	197	120	2	1	196	42	229	2e-34	129	205	513	96	96
AT5G07990	5	0.692	evgvelvLoc178812d208980t1	42.55	94	53	1	8	100	11	104	7e-19	82	100	513	93	93
AT3G22840	6	0.691	evgtrinTRINITY_DN65574c0_g1_i3	53.11	177	58	1	52	203	19	195	5e-61	192	203	195	75	75
AT3G22840	6	0.691	evgtrinTRINITY_DN58124c0_g1_i3	55.94	202	80	3	1	200	1	195	3e-58	185	200	195	100	100
AT3G22840	6	0.691	evgvelvLoc6418t1	52.59	116	47	2	1	114	8	117	1e-16	74.3	137	195	83	83
AT3G55290	5	0.69	evgtrinTRINITY_DN61093c0_g6_i3	61.48	283	96	2	9	291	11	280	4e-119	347	291	280	97	97
AT3G55290	5	0.69	evgtrinTRINITY_DN61381c1_g1_i14	60.22	279	98	3	10	288	12	277	5e-116	339	288	280	97	97
AT3G55290	5	0.69	evgtrinTRINITY_DN61093c0_g6_i5	60.5	281	100	2	9	289	11	280	4e-114	335	289	280	97	97
AT3G55290	5	0.69	evgtrinTRINITY_DN70949c0_g1_i1	56.56	221	95	1	4	224	61	280	1e-80	246	224	280	99	99
AT3G55290	5	0.69	evgtrinTRINITY_DN61381c0_g1_i1	63.35	161	58	1	1	161	121	280	9e-67	208	161	280	100	100
AT3G55290	5	0.69	evgvelvLoc74429d326235t1	58.02	131	52	1	1	131	1	128	8e-44	148	131	279	100	100
AT4G24670	1	0.69	evgtrinTRINITY_DN74612c0_g2_i1	56.25	448	179	5	11	457	3	434	2e-173	498	460	440	97	97
AT4G24670	1	0.69	evgvelvLoc1410t3	57	300	119	4	8	304	6	298	2e-111	334	304	440	98	98
AT3G56370	3	0.689	evgtrinTRINITY_DN73633c0_g4_i2utrorf	75.8	471	112	2	1	469	492	962	0	703	469	964	100	100
AT3G56370	3	0.689	evgtrinTRINITY_DN73633c0_g4_i6	58.78	507	195	4	2	507	3	496	0	549	508	964	99	99
AT3G60160	4	0.688	evgtrinTRINITY_DN75383c0_g2_i1	72.44	704	193	1	1	703	763	1466	0	1069	712	1470	99	99
AT3G60160	4	0.688	evgtrinTRINITY_DN75608c1_g1_i1	56.53	789	327	7	5	785	3	783	0	874	785	1379	99	99
AT5G11550	4	0.688	evgvelvLoc67100d525671t1	39.72	214	78	6	4	214	6	171	2e-18	82.4	214	314	99	99
AT5G37020	7	0.685	evgvelvLoc16801d472226t1	85.07	201	28	1	1	201	1	199	1e-123	371	201	773	100	100
AT5G37020	7	0.685	evgtrinTRINITY_DN75308c1_g1_i8	49.23	457	199	10	1	444	268	704	9e-116	360	453	716	98	98
AT5G37020	7	0.685	evgtrinTRINITY_DN75308c1_g2_i2	53.93	280	102	8	1	273	439	698	3e-83	267	273	716	100	100
AT5G37020	7	0.685	evgtrinTRINITY_DN62746c0_g1_i2	55.41	222	91	5	1	216	330	549	1e-56	193	220	773	98	98
AT1G64450	2	0.685	evgvelvLoc134849d593967t1	74.56	114	29	0	13	126	11	124	8e-49	162	133	342	86	86
AT3G53130	4	0.681	evgtrinTRINITY_DN70619c2_g1_i7	78.22	528	106	3	23	549	20	539	0	858	560	539	94	94
AT2G17880	2	0.675	evgtrinTRINITY_DN60895c0_g1_i1	47.89	142	50	5	91	226	37	160	1e-31	116	226	160	60	60
AT2G17880	2	0.675	evgtrinTRINITY_DN60895c0_g1_i2	47.89	142	50	5	90	225	37	160	9e-31	114	225	160	60	60
AT5G08640	3	0.672	evgtrinTRINITY_DN64989c0_g1_i8	63.77	334	120	1	1	333	1	334	3e-160	456	334	336	99	99
AT5G08640	3	0.672	evgtrinTRINITY_DN70847c0_g1_i2	48.96	335	165	4	1	330	1	334	5e-114	338	331	336	99	99
AT5G08640	3	0.672	evgtrinTRINITY_DN70847c0_g1_i1	48.66	335	166	4	1	330	1	334	8e-112	332	331	336	99	99
AT1G14440	1	0.672	evgvelvLoc2610d255407t1	62.5	48	18	0	132	179	109	156	6e-16	74.7	186	312	26	26
AT2G33810	5	0.671	evgtrinTRINITY_DN65094c0_g2_i2	75.93	54	13	0	1	54	78	131	2e-23	93.2	217	131	25	25
AT1G77610	4	0.669	evgtrinTRINITY_DN73408c1_g1_i11	83.54	316	47	1	1	316	1	311	0	536	316	336	100	100
AT1G77610	4	0.669	evgtrinTRINITY_DN73408c1_g1_i7	86.88	221	24	1	1	221	1	216	9e-139	397	222	336	99	99
AT1G77610	4	0.669	evgtrinTRINITY_DN73408c1_g1_i3	83.97	156	25	0	1	156	123	278	3e-89	268	163	336	96	96
AT1G77610	4	0.669	evgvelvLoc168853d627557t1	47.96	98	48	1	9	106	226	320	2e-19	82	107	336	92	92
AT5G53190	2	0.667	evgtrinTRINITY_DN66478c2_g1_i1	56.08	255	105	1	1	248	1	255	9e-97	288	249	263	99	99
AT5G53190	2	0.667	evgtrinTRINITY_DN63112c0_g1_i11	50	238	118	1	4	241	3	239	2e-83	254	242	263	98	98
AT5G53190	2	0.667	evgtrinTRINITY_DN66478c2_g2_i5	49	251	120	3	44	288	5	253	3e-83	255	288	263	85	85
AT5G53190	2	0.667	evgtrinTRINITY_DN64826c0_g1_i1	51.64	244	108	3	1	236	1	242	4e-82	250	244	263	97	97
AT5G53190	2	0.667	evgtrinTRINITY_DN63112c0_g1_i8	46.3	257	120	2	4	242	3	259	1e-81	249	242	263	99	99
AT5G53190	2	0.667	evgtrinTRINITY_DN64826c0_g1_i2	51.23	244	109	3	1	236	1	242	2e-78	241	244	263	97	97
AT5G53190	2	0.667	evgvelvLoc7814d260853t1	55.38	186	82	1	2	187	9	193	1e-67	211	187	263	99	99
AT5G53190	2	0.667	evgtrinTRINITY_DN66478c1_g2_i7	52.57	175	75	2	1	168	82	255	3e-55	179	169	263	99	99
AT5G53190	2	0.667	evgvelvLoc6091t1	67.19	64	21	0	1	64	36	99	5e-26	100	111	263	58	58
AT1G48480	7	0.666	evgtrinTRINITY_DN73011c0_g1_i1	58.55	415	147	7	22	421	32	436	1e-153	454	421	655	95	95
AT1G48480	7	0.666	evgtrinTRINITY_DN73011c0_g1_i2	58.31	415	148	7	22	421	32	436	1e-153	454	421	655	95	95
AT1G48480	7	0.666	evgtrinTRINITY_DN68646c1_g1_i1	58.65	416	142	11	18	414	32	436	1e-145	434	414	655	96	96
AT1G48480	7	0.666	evgtrinTRINITY_DN58157c0_g1_i2	33.76	625	325	23	33	586	36	642	2e-84	280	590	655	94	94
AT1G72970	5	0.666	evgtrinTRINITY_DN67718c0_g2_i2	64.58	576	198	2	22	594	22	594	0	770	594	594	96	96
AT1G72970	5	0.666	evgtrinTRINITY_DN67718c0_g2_i3	63.8	279	101	0	1	279	316	594	9e-125	372	279	594	100	100
AT1G13280	6	0.662	evgvelvLoc1238d90439t1	53.17	126	56	3	1	123	99	224	3e-34	122	124	254	99	99
AT4G03210	2	0.662	evgtrinTRINITY_DN65828c0_g2_i8	72.49	269	69	2	26	294	24	287	1e-152	433	294	290	91	91
AT4G03210	2	0.662	evgtrinTRINITY_DN54482c0_g1_i1	52.8	125	56	3	1	125	135	256	1e-43	147	127	262	98	98
AT4G03210	2	0.662	evgvelvLoc6043t3	78.95	38	8	0	16	53	77	114	8e-16	73.9	199	262	19	19
AT3G51895	4	0.661	evgtrinTRINITY_DN73808c0_g1_i3	73.9	659	168	3	1	656	46	703	0	1017	656	703	100	100
AT3G51895	4	0.661	evgtrinTRINITY_DN55091c0_g1_i1	69.71	241	72	1	1	240	406	646	4e-120	361	253	658	95	95
AT3G51895	4	0.661	evgtrinTRINITY_DN43674c0_g1_i1	62.96	81	30	0	39	119	383	463	3e-28	109	119	658	68	68
AT3G51895	4	0.661	evgvelvLoc6280t2	63.79	58	19	1	84	139	230	287	8e-17	79	167	703	34	34
AT1G69420	2	0.66	evgtrinTRINITY_DN67363c0_g1_i4	55.1	392	140	10	1	364	212	595	5e-127	383	397	596	92	92
AT1G69420	2	0.66	evgtrinTRINITY_DN74546c0_g2_i1	57.09	254	90	5	1	252	1	237	6e-95	294	252	596	100	100
AT1G69420	2	0.66	evgtrinTRINITY_DN74546c0_g1_i15	61.79	212	62	4	1	211	1	194	3e-82	261	261	596	81	81
AT1G69420	2	0.66	evgtrinTRINITY_DN74546c0_g1_i4	51.21	248	82	9	2	223	361	595	1e-53	185	256	596	87	87
AT1G69420	2	0.66	evgvelvLoc27452d280561t1	74	100	24	1	42	139	219	318	1e-46	160	139	596	71	71
AT4G16447	4	0.658	evgvelvLoc24158d480248t1	33.08	133	70	5	36	160	4	125	6e-08	48.9	160	125	78	78
AT4G16447	4	0.658	evgvelvLoc43870d296704t2	33.09	136	66	6	36	160	4	125	3e-06	44.3	160	125	78	78
AT1G51460	4	0.657	evgvelvLoc7585t2	40.48	84	44	1	4	87	600	677	6e-16	74.3	109	678	77	77
AT1G51460	4	0.657	evgvelvLoc135291d381102t1	60	30	12	0	4	33	599	628	0.0002	39.3	63	678	48	48
AT4G22730	3	0.657	evgtrinTRINITY_DN65867c0_g2_i6	60.06	323	123	3	22	339	22	343	5e-130	386	339	529	94	94
AT4G22730	3	0.657	evgtrinTRINITY_DN65867c0_g2_i4	59.75	323	124	3	22	339	22	343	8e-127	378	339	529	94	94
AT4G22730	3	0.657	evgvelvLoc102556t1	43.27	104	59	0	2	105	102	205	1e-21	89.7	106	529	98	98
AT2G42800	1	0.657	evgtrinTRINITY_DN65315c0_g1_i2	64.48	411	142	2	49	455	29	439	3e-175	504	475	462	86	86
AT1G14900	3	0.656	evgtrinTRINITY_DN62291c0_g2_i1	44.1	195	91	3	20	196	1	195	2e-39	137	205	204	86	86
AT3G01140	3	0.654	evgtrinTRINITY_DN66618c0_g2_i2	55.27	389	127	10	1	387	1	344	7e-122	360	387	345	100	100
AT3G01140	3	0.654	evgvelvLoc111570t1	74.67	75	19	0	28	102	44	118	6e-37	131	126	345	60	60
AT3G01140	3	0.654	evgvelvLoc77281d147675t1	46.09	115	41	4	1	112	135	231	7e-17	76.6	142	345	79	79
AT1G10850	5	0.653	evgtrinTRINITY_DN74290c0_g3_i2	63.95	638	213	8	25	649	30	663	0	805	649	663	96	96
AT1G10850	5	0.653	evgtrinTRINITY_DN74290c0_g1_i3	76.11	314	74	1	3	315	350	663	5e-173	499	315	663	99	99
AT1G10850	5	0.653	evgtrinTRINITY_DN66604c0_g2_i1	56.13	310	121	5	28	336	30	325	2e-101	316	337	663	92	92
AT3G58780	4	0.653	evgvelvLoc50676d508566t1	41.48	176	103	0	3	178	15	190	9e-46	154	193	248	91	91
AT1G02800	1	0.653	evgvelvLoc280453d248179t1	77.36	106	24	0	26	131	41	146	1e-52	176	133	501	80	80
AT1G75240	1	0.653	evgtrinTRINITY_DN71594c0_g2_i1	83.93	56	9	0	129	184	73	128	2e-28	110	194	309	29	29
AT2G40610	3	0.651	evgtrinTRINITY_DN62139c0_g2_i4	80.32	249	46	2	5	252	7	253	2e-147	417	252	253	98	98
AT2G40610	3	0.651	evgtrinTRINITY_DN62139c0_g3_i2	84.54	207	31	1	1	206	47	253	2e-129	369	206	253	100	100
AT5G63140	5	0.65	evgtrinTRINITY_DN65742c0_g1_i8	65.99	347	114	3	77	420	39	384	6e-172	492	431	389	80	80
AT2G46420	2	0.65	evgtrinTRINITY_DN71582c0_g6_i4	73.76	362	89	4	12	371	6	363	0	536	371	363	97	97
AT1G72250	2	0.65	evgtrinTRINITY_DN75334c0_g1_i3	52.54	748	291	15	8	719	6	725	0	714	719	1215	99	99
AT1G72250	2	0.65	evgtrinTRINITY_DN75334c0_g1_i4	55.34	1086	403	20	8	1053	6	1049	0	1107	1161	1215	99	90
AT2G46420	2	0.65	evgtrinTRINITY_DN71582c0_g5_i6	64.78	301	98	5	1	297	67	363	8e-131	380	297	363	100	100
AT1G72250	2	0.65	evgtrinTRINITY_DN57957c0_g1_i1	64.29	336	104	5	1	335	703	1023	1e-124	394	463	1195	95	72
AT1G72250	2	0.65	evgtrinTRINITY_DN58483c0_g1_i2	44.14	444	208	14	8	424	6	436	8e-92	303	424	1215	98	98
AT2G23800	2	0.647	evgvelvLoc66900d525464t1	37.74	53	33	0	80	132	88	140	2e-06	46.6	132	376	40	40
AT5G23960	3	0.645	evgtrinTRINITY_DN72011c2_g2_i1	39.16	549	320	5	19	559	1	543	3e-136	411	559	545	97	97
AT5G23960	3	0.645	evgvelvLoc29744d112956t1	39.8	505	293	4	21	519	3	502	2e-133	402	520	545	96	96
AT5G23960	3	0.645	evgvelvLoc117672d365896t1	41.19	352	206	1	1	352	162	512	3e-99	308	352	545	100	100
AT5G23960	3	0.645	evgvelvLoc188422d67196t1	43.66	213	119	1	10	222	99	310	6e-61	202	222	545	96	96
AT5G23960	3	0.645	evgtrinTRINITY_DN72011c2_g4_i2	41.2	233	137	0	2	234	217	449	7e-61	203	237	545	98	98
AT5G23960	3	0.645	evgtrinTRINITY_DN50982c0_g2_i4	35.02	277	176	3	2	276	273	547	3e-57	195	277	547	99	99
AT5G23960	3	0.645	evgvelvLoc96008t1	44.14	222	111	4	6	221	34	248	2e-54	185	223	545	97	97
AT5G23960	3	0.645	evgvelvLoc161644t1	48.45	161	81	1	2	162	149	307	2e-47	164	162	545	99	99
AT5G23960	3	0.645	evgtrinTRINITY_DN75866c0_g2_i2	35.8	176	108	3	1	172	42	216	7e-29	112	176	545	98	98
AT5G23960	3	0.645	evgvelvLoc86779t1	35.59	118	76	0	2	119	405	522	7e-25	99.8	119	545	99	99
AT5G23960	3	0.645	evgvelvLoc192809d426619t1	35.29	119	77	0	2	120	394	512	8e-25	99.8	120	545	99	99
AT5G23960	3	0.645	evgtrinTRINITY_DN75866c0_g2_i4	39.42	137	79	2	6	138	41	177	1e-24	100	148	545	90	90
AT5G23960	3	0.645	evgvelvLoc103829d166233t1	42	50	28	1	1	50	495	543	5e-08	48.9	50	545	100	100
AT3G27360	2	0.644	evgtrinTRINITY_DN61838c0_g1_i1	99.26	136	1	0	1	136	1	136	7e-94	271	136	136	100	100
AT3G27360	2	0.644	evgtrinTRINITY_DN69228c0_g1_i3	99.26	136	1	0	1	136	1	136	7e-94	271	136	136	100	100
AT3G27360	2	0.644	evgtrinTRINITY_DN69811c0_g3_i3	99.26	136	1	0	1	136	1	136	7e-94	271	136	136	100	100
AT3G27360	2	0.644	evgtrinTRINITY_DN67582c0_g2_i2	99.19	123	1	0	1	123	14	136	2e-84	246	123	136	100	100
AT3G27360	2	0.644	evgvelvLoc50272d508148t1	86.21	29	4	0	103	131	46	74	2e-09	52.8	138	136	21	21
AT1G24020	7	0.642	evgtrinTRINITY_DN58818c0_g1_i4	56.95	151	65	0	1	151	1	151	1e-57	181	152	155	99	99
AT1G24020	7	0.642	evgtrinTRINITY_DN60782c0_g2_i2	34.23	149	98	0	3	151	2	150	1e-25	98.2	153	155	97	97
AT1G24020	7	0.642	evgtrinTRINITY_DN60782c0_g1_i2	35.37	147	95	0	5	151	4	150	3e-25	97.4	153	155	96	96
AT1G24020	7	0.642	evgtrinTRINITY_DN60782c0_g2_i1	32.89	149	100	0	3	151	2	150	1e-24	95.9	153	155	97	97
AT1G24020	7	0.642	evgtrinTRINITY_DN60966c0_g1_i3	33.11	151	99	1	1	151	1	149	1e-21	88.2	158	155	96	96
AT1G24020	7	0.642	evgtrinTRINITY_DN60966c0_g1_i1	32.62	141	95	0	41	181	9	149	1e-20	85.9	188	155	75	75
AT1G24020	7	0.642	evgtrinTRINITY_DN60782c0_g1_i1	29.93	147	103	0	5	151	4	150	3e-18	78.6	153	155	96	96
AT1G24020	7	0.642	evgvelvLoc32266d488970t1	34.23	149	82	7	46	187	16	155	2e-13	65.9	189	155	75	75
AT1G24020	7	0.642	evgtrinTRINITY_DN73121c0_g1_i7	33.13	163	90	8	2	157	5	155	9e-12	60.5	159	155	98	98
AT1G24020	7	0.642	evgtrinTRINITY_DN70281c2_g1_i3	31.19	109	67	5	2	108	53	155	3e-05	41.2	110	155	97	97
AT1G16060	2	0.642	evgtrinTRINITY_DN65063c0_g2_i5	56.67	360	120	7	1	352	14	345	6e-113	337	362	345	97	97
AT1G16060	2	0.642	evgtrinTRINITY_DN65063c0_g2_i11	56.39	360	121	7	1	352	14	345	2e-111	333	362	345	97	97
AT1G16060	2	0.642	evgtrinTRINITY_DN59147c0_g1_i2	49.02	51	23	1	5	55	51	98	2e-05	43.9	197	189	26	26
AT1G16060	2	0.642	evgtrinTRINITY_DN59147c0_g1_i1	49.06	53	22	2	5	57	137	184	5e-05	43.5	197	275	27	27
AT4G15210	7	0.638	evgtrinTRINITY_DN71555c1_g1_i6	72.9	369	99	1	5	372	1	369	0	580	411	420	90	90
AT4G14750	3	0.638	evgtrinTRINITY_DN72450c0_g1_i5	46.48	469	143	19	1	452	1	378	2e-98	305	459	387	98	98
AT4G14750	3	0.638	evgtrinTRINITY_DN62661c0_g1_i3	44.65	327	108	14	39	345	103	376	3e-62	207	358	387	86	86
AT4G14750	3	0.638	evgtrinTRINITY_DN62661c0_g1_i2	42.51	327	115	14	39	345	103	376	4e-56	191	358	387	86	86
AT4G14750	3	0.638	evgvelvLoc24328d108939t3	31.68	161	69	5	3	156	60	186	2e-08	53.1	158	460	97	97
AT4G14750	3	0.638	evgvelvLoc14818d470022t1	38.33	60	19	2	1	47	60	114	0.0007	38.1	104	460	45	45
AT3G18850	6	0.637	evgtrinTRINITY_DN70985c0_g3_i3	65.18	359	124	1	18	375	12	370	0	513	382	375	94	94
AT1G01300	2	0.635	evgtrinTRINITY_DN67863c0_g2_i2	66.52	457	143	6	29	478	32	485	0	579	478	485	94	94
AT1G01300	2	0.635	evgtrinTRINITY_DN74410c2_g2_i13	68.51	416	126	5	80	492	72	485	0	551	492	485	84	84
AT1G01300	2	0.635	evgvelvLoc25836d482066t1	71.72	99	28	0	1	99	277	375	3e-43	149	100	485	99	99
AT5G28640	1	0.635	evgtrinTRINITY_DN69878c0_g4_i1	64.71	187	40	5	1	171	1	177	3e-58	187	226	210	76	76
AT2G36490	6	0.634	evgvelvLoc9419t1	49.56	113	47	3	25	134	473	578	2e-24	100	144	1393	76	76
AT2G36490	6	0.634	evgtrinTRINITY_DN64465c0_g1_i1	44.63	121	48	3	443	560	473	577	2e-21	99.8	560	1393	21	21
AT4G22200	3	0.634	evgtrinTRINITY_DN73433c0_g1_i6	63.65	817	252	10	19	829	22	799	0	1045	837	802	97	97
AT4G22200	3	0.634	evgvelvLoc54761d307318t1	56.92	130	54	2	1	128	452	581	7e-42	148	142	599	90	90
AT3G59420	2	0.632	evgtrinTRINITY_DN74848c0_g1_i1	66.7	916	277	11	23	931	1	895	0	1187	931	895	98	98
AT5G49130	5	0.631	evgtrinTRINITY_DN61292c0_g1_i1	63.66	454	157	3	1	447	40	492	0	562	453	502	99	99
AT3G05470	1	0.629	evgtrinTRINITY_DN68731c1_g2_i1	45.93	577	197	13	193	750	198	678	8e-116	374	750	884	74	74
AT3G05470	1	0.629	evgtrinTRINITY_DN72851c0_g5_i1	65.3	219	72	2	1	215	666	884	2e-88	281	215	884	100	100
AT3G05470	1	0.629	evgvelvLoc85689d544719t1	69.16	107	33	0	1	107	518	624	2e-44	155	107	884	100	100
AT4G39860	2	0.628	evgtrinTRINITY_DN70249c1_g2_i5	64.14	304	104	2	1	304	1	299	6e-130	376	304	299	100	100
AT4G39860	2	0.628	evgtrinTRINITY_DN70249c1_g1_i2	61.38	246	89	1	1	246	1	240	2e-100	299	246	299	100	100
AT5G67070	2	0.628	evgvelvLoc105945d355416t1	57.14	105	34	4	96	191	26	128	2e-35	124	192	129	50	50
AT4G39860	2	0.628	evgtrinTRINITY_DN70249c1_g2_i7	75.86	29	7	0	77	105	206	234	8e-09	52.4	105	298	28	28
AT4G39330	3	0.626	evgtrinTRINITY_DN64121c0_g1_i3	66.76	358	119	0	1	358	1	358	7e-179	505	360	360	99	99
AT4G39330	3	0.626	evgtrinTRINITY_DN70938c3_g3_i5	65.28	360	125	0	1	360	1	360	2e-175	496	360	360	100	100
AT4G39330	3	0.626	evgtrinTRINITY_DN70938c3_g3_i3	64.35	359	128	0	1	359	1	359	1e-172	489	362	360	99	99
AT4G39330	3	0.626	evgtrinTRINITY_DN61231c1_g1_i2	66.96	345	113	1	1	344	1	345	1e-168	478	344	360	100	100
AT4G39330	3	0.626	evgtrinTRINITY_DN48988c0_g1_i1	64.02	353	125	1	8	360	8	358	3e-163	466	363	360	97	97
AT4G39330	3	0.626	evgvelvLoc57260d309740t1	62.78	352	128	2	8	358	8	357	1e-157	452	372	360	94	94
AT4G39330	3	0.626	evgtrinTRINITY_DN63844c0_g1_i2	59.83	351	140	1	8	358	9	358	7e-150	432	361	360	97	97
AT4G39330	3	0.626	evgtrinTRINITY_DN67344c2_g1_i7	57.75	355	148	2	1	354	1	354	3e-143	415	367	360	96	96
AT4G39330	3	0.626	evgtrinTRINITY_DN72524c0_g1_i1	65	300	105	0	1	300	1	300	9e-142	406	300	311	100	100
AT4G39330	3	0.626	evgtrinTRINITY_DN72524c0_g1_i3	65.19	293	102	0	2	294	8	300	2e-137	395	294	311	99	99
AT4G39330	3	0.626	evgtrinTRINITY_DN72524c0_g1_i4	66.2	284	96	0	2	285	8	291	5e-134	386	285	311	99	99
AT4G39330	3	0.626	evgtrinTRINITY_DN70938c2_g1_i1	67.5	200	65	0	1	200	1	200	2e-92	277	200	311	100	100
AT4G39330	3	0.626	evgtrinTRINITY_DN72524c0_g1_i2	65.62	160	55	0	2	161	8	167	1e-78	240	161	311	99	99
AT4G39330	3	0.626	evgvelvLoc208187t2	59.55	178	69	2	2	178	11	186	2e-77	238	189	311	94	94
AT4G39330	3	0.626	evgvelvLoc1398d910t3	51.54	130	46	1	1	130	241	353	1e-39	139	137	360	95	95
AT2G28630	2	0.626	evgtrinTRINITY_DN63378c0_g1_i1	59.47	449	167	2	20	453	19	467	0	572	464	476	94	94
AT2G28630	2	0.626	evgtrinTRINITY_DN69124c0_g1_i11	63.68	446	143	5	27	455	20	463	0	587	459	476	93	93
AT2G28630	2	0.626	evgtrinTRINITY_DN69124c0_g1_i3	64.25	456	145	5	58	497	20	473	0	613	497	476	89	89
AT2G28630	2	0.626	evgtrinTRINITY_DN69124c0_g1_i4	64.04	456	145	5	27	465	20	473	0	610	465	476	94	94
AT2G28630	2	0.626	evgtrinTRINITY_DN69124c0_g1_i5	58.99	456	175	4	22	468	21	473	0	575	468	476	96	96
AT2G28630	2	0.626	evgtrinTRINITY_DN69124c0_g1_i9	63.9	446	143	5	58	487	20	463	0	590	491	476	88	88
AT3G22790	1	0.626	evgtrinTRINITY_DN71639c0_g1_i1	34.77	949	540	20	1	933	837	1722	2e-122	411	938	1728	99	99
AT3G22790	1	0.626	evgvelvLoc13491d468526t1	33.9	177	117	0	1	177	1102	1278	1e-14	73.2	177	1728	100	100
AT3G22790	1	0.626	evgvelvLoc96476t2	41.33	75	36	2	10	84	19	85	5e-10	57.4	118	1728	64	64
AT5G22500	3	0.625	evgtrinTRINITY_DN74216c0_g1_i11	46.54	159	84	1	1	158	38	196	2e-49	166	159	398	99	99
AT5G22500	3	0.625	evgvelvLoc96194t1	61.76	34	13	0	1	34	28	61	7e-07	47.4	113	398	30	30
AT3G14240	2	0.625	evgtrinTRINITY_DN73525c2_g2_i1	72.34	770	191	5	42	810	27	775	0	1147	810	775	95	95
AT3G14240	2	0.625	evgtrinTRINITY_DN73525c2_g2_i4	73.71	563	127	4	42	603	27	569	0	842	603	775	93	93
AT5G43020	1	0.625	evgtrinTRINITY_DN56294c0_g1_i1	52.94	221	94	3	1	214	241	458	7e-62	207	214	669	100	100
AT5G43020	1	0.625	evgvelvLoc28246t1	58.27	139	57	1	1	138	139	277	3e-44	155	138	669	100	100
AT3G28050	4	0.624	evgtrinTRINITY_DN65154c0_g2_i14	46.97	347	174	5	1	345	1	339	2e-101	308	357	367	97	97
AT3G28050	4	0.624	evgtrinTRINITY_DN70343c0_g1_i3	44.01	284	136	6	6	276	94	367	1e-70	226	276	367	98	98
AT5G45670	3	0.624	evgtrinTRINITY_DN69129c0_g1_i8	63.91	363	130	1	5	367	1	362	4e-176	499	367	362	99	99
AT5G45670	3	0.624	evgtrinTRINITY_DN69129c0_g3_i10	65.75	362	119	2	5	366	4	360	3e-175	496	368	362	98	98
AT5G45670	3	0.624	evgtrinTRINITY_DN68513c0_g2_i9	54.82	363	159	2	7	367	3	362	8e-149	429	370	362	98	98
AT5G45670	3	0.624	evgtrinTRINITY_DN69129c0_g3_i8	65.25	305	101	2	5	309	4	303	2e-141	408	309	362	99	99
AT5G45670	3	0.624	evgtrinTRINITY_DN76084c2_g1_i7	49.58	361	176	4	11	367	4	362	5e-127	374	367	362	97	97
AT5G45670	3	0.624	evgtrinTRINITY_DN52384c0_g1_i5	49.16	358	175	4	9	360	6	362	7e-124	365	360	362	98	98
AT5G45670	3	0.624	evgvelvLoc17179t2	64.1	78	28	0	29	106	85	162	3e-29	109	106	362	74	74
AT4G10955	4	0.623	evgtrinTRINITY_DN65842c1_g3_i4	60.4	351	127	5	1	341	2	350	1e-151	435	341	350	100	100
AT4G10955	4	0.623	evgtrinTRINITY_DN65842c1_g3_i5	58.97	351	132	5	1	341	2	350	5e-147	423	341	350	100	100
AT4G10955	4	0.623	evgtrinTRINITY_DN58074c0_g1_i2	51.14	352	155	5	1	338	2	350	2e-122	360	342	350	99	99
AT4G10955	4	0.623	evgvelvLoc71315d323261t1	46.19	236	116	4	9	241	123	350	3e-72	228	241	350	97	97
AT4G10955	4	0.623	evgvelvLoc21116d10890t1	48.57	210	95	5	1	202	146	350	6e-63	202	202	350	100	100
AT1G25330	4	0.623	evgvelvLoc112366d361184t1	72.03	118	32	1	144	260	94	211	3e-54	178	271	223	43	43
AT1G25330	4	0.623	evgtrinTRINITY_DN65705c0_g3_i1	66.92	133	42	2	145	275	91	223	8e-53	175	275	223	48	48
AT4G10955	4	0.623	evgvelvLoc79486t1	39.31	145	72	3	1	135	1	139	2e-28	108	135	350	100	100
AT1G75880	3	0.623	evgtrinTRINITY_DN71803c0_g2_i3	53.82	353	157	2	20	371	27	374	4e-130	382	371	374	95	95
AT1G47740	1	0.623	evgtrinTRINITY_DN70106c0_g1_i3	72.69	238	61	2	2	235	42	279	6e-122	353	252	279	93	93
AT1G47740	1	0.623	evgtrinTRINITY_DN70106c0_g4_i2	61.35	251	77	4	1	231	29	279	2e-101	300	231	279	100	100
AT2G05790	2	0.622	evgtrinTRINITY_DN70351c0_g1_i2	69.73	446	127	2	32	477	21	458	0	638	477	472	94	94
AT2G05790	2	0.622	evgtrinTRINITY_DN62254c0_g1_i3	66.76	349	113	1	21	366	21	369	4e-171	490	372	472	93	93
AT2G05790	2	0.622	evgtrinTRINITY_DN62254c0_g1_i1	66.76	349	113	1	21	366	21	369	9e-170	487	372	472	93	93
AT2G05790	2	0.622	evgvelvLoc107696d356994t1	57.14	63	27	0	7	69	212	274	9e-19	81.6	102	472	62	62
AT2G05790	2	0.622	evgvelvLoc246299t1	39.62	106	52	4	1	99	276	376	3e-10	57.4	107	472	93	93
AT2G05790	2	0.622	evgvelvLoc74957t2	57.69	26	11	0	77	102	21	46	0.001	37.7	118	472	22	22
AT3G23890	1	0.622	evgtrinTRINITY_DN74776c0_g1_i2	65.33	1474	445	19	6	1434	4	1456	0	1866	1451	1473	98	98
AT2G07690	1	0.621	evgtrinTRINITY_DN73393c0_g1_i5	75.68	736	169	4	1	735	1	727	0	1145	735	727	100	100
AT5G52390	3	0.62	evgtrinTRINITY_DN63506c0_g1_i1	55.21	192	70	2	7	183	3	193	1e-70	216	187	195	95	95
AT1G54570	2	0.62	evgtrinTRINITY_DN72702c0_g1_i1	57.14	714	290	6	8	717	3	704	0	839	717	704	99	99
AT4G28310	1	0.619	evgtrinTRINITY_DN64750c0_g1_i1	42.47	219	90	9	7	218	10	199	1e-38	138	310	202	68	68
AT5G50790	6	0.618	evgtrinTRINITY_DN54131c0_g2_i1	42.92	226	116	2	1	213	56	281	2e-62	201	242	289	88	88
AT1G66120	2	0.618	evgtrinTRINITY_DN64568c0_g2_i1	60	470	177	5	1	460	80	548	0	573	497	572	93	93
AT4G13710	5	0.617	evgtrinTRINITY_DN64536c0_g1_i5	64.61	356	124	1	59	414	117	470	0	521	420	470	85	85
AT4G13710	5	0.617	evgtrinTRINITY_DN64984c0_g1_i1	85.77	274	39	0	1	274	197	470	8e-180	508	274	470	100	100
AT4G13710	5	0.617	evgtrinTRINITY_DN64984c0_g1_i3	81.75	274	50	0	1	274	197	470	5e-174	493	274	470	100	100
AT4G13710	5	0.617	evgtrinTRINITY_DN64984c0_g1_i6	80.66	274	53	0	1	274	197	470	2e-172	489	274	470	100	100
AT4G13710	5	0.617	evgvelvLoc50680t3	71.57	102	29	0	1	102	369	470	2e-45	154	102	470	100	100
AT4G13710	5	0.617	evgvelvLoc21955t1	88.06	67	8	0	1	67	332	398	2e-39	137	85	470	79	79
AT5G26850	2	0.617	evgtrinTRINITY_DN69410c1_g1_i4	50.38	925	408	15	1	894	1	905	0	892	895	983	99	99
AT5G26850	2	0.617	evgtrinTRINITY_DN75279c2_g3_i8	56.28	828	343	7	1	824	1	813	0	948	832	983	99	99
AT5G26850	2	0.617	evgvelvLoc3710d457568t1	53.85	104	48	0	1	104	298	401	9e-36	131	104	983	100	100
AT4G38660	1	0.616	evgtrinTRINITY_DN61067c0_g1_i4	55.47	375	127	6	1	368	2	343	2e-128	377	370	345	99	99
AT4G38660	1	0.616	evgtrinTRINITY_DN61067c0_g1_i7	69.81	265	78	2	1	264	2	265	4e-127	370	292	345	90	90
AT4G38660	1	0.616	evgtrinTRINITY_DN60821c0_g1_i2	60	295	89	5	2	272	55	344	7e-111	328	277	345	98	98
AT2G04570	3	0.615	evgtrinTRINITY_DN65853c0_g1_i5	58.8	284	115	1	12	293	4	287	2e-120	357	380	350	74	74
AT1G60060	4	0.614	evgtrinTRINITY_DN72942c1_g1_i1	69.35	310	64	7	1	283	1	306	4e-141	410	371	386	76	76
AT1G60060	4	0.614	evgtrinTRINITY_DN72942c1_g2_i12	78.26	161	31	2	1	158	1	160	7e-83	256	221	386	71	71
AT1G60060	4	0.614	evgtrinTRINITY_DN74767c0_g1_i2	57.55	139	35	3	8	128	10	142	4e-48	162	130	386	93	93
AT1G60060	4	0.614	evgvelvLoc136072t1	51.61	124	25	6	12	109	152	266	3e-23	93.2	110	346	89	89
AT1G60060	4	0.614	evgtrinTRINITY_DN60894c0_g2_i2	39.19	148	72	6	1	144	134	267	2e-15	73.9	196	346	73	73
AT4G33260	1	0.613	evgtrinTRINITY_DN65492c0_g1_i1	44.98	418	208	9	26	436	25	427	5e-117	354	453	447	92	91
AT4G33260	1	0.613	evgvelvLoc54680d512769t1	83.96	106	17	0	1	106	233	338	8e-61	195	106	441	100	100
AT4G18570	2	0.611	evgtrinTRINITY_DN60713c0_g1_i2	72.5	280	65	5	1	271	356	632	1e-126	378	272	642	99	99
AT4G18570	2	0.611	evgtrinTRINITY_DN62582c0_g1_i1	39.07	151	71	3	65	213	86	217	9e-20	90.9	332	642	45	45
AT4G18570	2	0.611	evgvelvLoc24471d480584t1	68	25	8	0	9	33	193	217	3e-05	43.5	156	642	16	16
AT4G37750	1	0.61	evgtrinTRINITY_DN72387c1_g2_i6	85.03	147	22	0	1	147	324	470	7e-87	275	326	555	100	45
AT4G37750	1	0.61	evgvelvLoc11897d466743t1	84.78	138	21	0	1	138	333	470	1e-82	257	156	555	88	88
AT4G37750	1	0.61	evgtrinTRINITY_DN64293c0_g1_i1	88.29	111	13	0	1	111	360	470	3e-64	214	271	555	100	41
AT4G37750	1	0.61	evgtrinTRINITY_DN72387c1_g3_i1	64.78	159	28	3	264	394	190	348	8e-57	198	406	555	77	32
AT4G37750	1	0.61	evgtrinTRINITY_DN66312c1_g2_i2	40.13	304	86	11	35	310	58	293	4e-45	163	310	555	89	89
AT4G37750	1	0.61	evgvelvLoc104425d354050t1	79.35	92	9	1	36	127	320	401	1e-44	155	127	555	72	72
AT4G37750	1	0.61	evgvelvLoc7659d461997t1	39.56	182	92	6	5	181	9	177	1e-22	98.2	276	555	64	64
AT4G37750	1	0.61	evgvelvLoc26725d110743t1	60	75	26	1	32	102	320	394	1e-21	91.3	127	555	56	56
AT4G37750	1	0.61	evgtrinTRINITY_DN75261c1_g8_i4	78.57	28	6	0	9	36	76	103	4e-09	53.9	105	555	27	27
AT4G37750	1	0.61	evgtrinTRINITY_DN64587c0_g1_i2	42.42	66	27	1	19	84	71	125	5e-07	50.4	239	555	28	28
AT5G16440	6	0.609	evgvelvLoc134755d593876t1	90.91	121	11	0	1	121	75	195	3e-78	236	121	291	100	100
AT1G68560	5	0.609	evgtrinTRINITY_DN74304c0_g2_i2	71.87	903	243	4	25	926	22	914	0	1393	928	915	97	97
AT3G51280	1	0.607	evgtrinTRINITY_DN67342c1_g1_i6	63.92	474	117	9	12	484	6	426	0	571	493	430	96	96
AT3G51280	1	0.607	evgtrinTRINITY_DN67342c0_g1_i1	79.4	199	31	2	1	195	1	193	8e-108	320	196	430	99	99
AT3G51280	1	0.607	evgtrinTRINITY_DN67342c0_g2_i1	58.85	260	102	2	18	276	7	262	8e-100	318	733	430	35	35
AT3G51280	1	0.607	evgtrinTRINITY_DN67342c0_g3_i1	48.7	269	85	10	1	263	206	427	4e-63	207	266	430	99	99
AT3G51280	1	0.607	evgvelvLoc42248d499659t1	81.03	116	16	1	1	116	1	110	4e-61	196	116	430	100	100
AT3G51240	4	0.606	evgtrinTRINITY_DN75989c2_g2_i1	84.89	225	34	0	4	228	3	227	8e-145	413	228	358	99	99
AT3G51240	4	0.606	evgtrinTRINITY_DN69312c0_g1_i2	82.96	223	38	0	1	223	1	223	3e-142	406	223	358	100	100
AT3G51240	4	0.606	evgtrinTRINITY_DN75989c2_g3_i3	84.97	173	19	2	1	173	109	274	2e-102	300	173	274	100	100
AT3G51240	4	0.606	evgtrinTRINITY_DN55221c0_g1_i1	85.03	167	20	1	1	167	113	274	8e-101	295	167	274	100	100
AT1G61170	2	0.605	evgvelvLoc77693d536562t1	37.75	151	54	6	1	140	130	251	3e-15	70.9	140	251	100	100
AT1G61170	2	0.605	evgtrinTRINITY_DN63388c0_g1_i1	35	200	81	5	121	308	89	251	6e-15	73.6	308	251	61	61
AT4G09510	1	0.605	evgtrinTRINITY_DN68788c0_g2_i8	72.67	494	127	4	96	588	72	558	0	772	588	558	84	84
AT4G09510	1	0.605	evgtrinTRINITY_DN71572c0_g3_i7	86.34	549	72	3	9	555	11	558	0	997	555	558	99	99
AT4G09510	1	0.605	evgtrinTRINITY_DN71572c0_g4_i4	79.96	549	102	5	24	570	16	558	0	922	570	558	96	96
AT5G51560	1	0.604	evgtrinTRINITY_DN65867c0_g1_i3	62.58	652	240	2	27	678	31	678	0	852	680	680	96	96
AT5G51560	1	0.604	evgtrinTRINITY_DN65867c0_g3_i1	65.97	335	111	2	1	334	341	673	2e-157	461	336	680	99	99
AT5G55670	1	0.604	evgtrinTRINITY_DN70874c0_g2_i1	62.86	490	157	11	15	492	234	710	4e-150	450	492	710	97	97
AT5G55670	1	0.604	evgtrinTRINITY_DN70874c0_g7_i4	57.1	303	93	10	29	308	422	710	2e-79	258	308	710	91	91
AT5G55670	1	0.604	evgtrinTRINITY_DN70874c0_g6_i1	66.18	136	39	1	16	144	235	370	3e-55	185	150	585	86	86
AT5G51560	1	0.604	evgvelvLoc56049t2	50.47	107	52	1	1	107	107	212	2e-23	95.9	110	680	100	97
AT5G51560	1	0.604	evgtrinTRINITY_DN60512c0_g1_i1	42.98	114	65	0	1	114	78	191	8e-22	91.7	114	680	100	100
AT5G55670	1	0.604	evgtrinTRINITY_DN59011c0_g1_i1	44.9	98	36	4	1	81	1	97	3e-11	62.4	192	585	42	42
AT3G15550	1	0.603	evgtrinTRINITY_DN75015c0_g1_i2	60.1	381	130	2	7	387	7	365	4e-157	464	387	729	98	98
AT5G44560	1	0.603	evgtrinTRINITY_DN61684c0_g1_i4	79.09	220	40	1	19	232	3	222	2e-117	338	232	222	92	92
AT3G15550	1	0.603	evgvelvLoc52198d510173t1	62.09	211	58	3	1	211	101	289	2e-83	265	211	729	100	100
AT3G15550	1	0.603	evgtrinTRINITY_DN63757c0_g1_i2	40.49	410	200	11	1	401	355	729	1e-61	214	401	729	100	100
AT3G15550	1	0.603	evgtrinTRINITY_DN63341c0_g1_i3	65.32	124	43	0	3	126	8	131	1e-55	188	164	729	76	76
AT3G15550	1	0.603	evgtrinTRINITY_DN75015c1_g3_i3	51.2	250	101	5	4	239	275	517	8e-52	181	241	729	98	98
AT3G15550	1	0.603	evgtrinTRINITY_DN75015c1_g3_i4	54.33	208	84	2	4	203	275	479	1e-48	171	233	729	86	86
AT3G15550	1	0.603	evgtrinTRINITY_DN61139c0_g1_i1	35.55	256	120	9	11	260	513	729	1e-25	107	260	729	96	96
AT3G15550	1	0.603	evgtrinTRINITY_DN61139c0_g1_i2	35.07	268	121	11	2	261	507	729	5e-25	105	261	729	99	99
AT3G15550	1	0.603	evgvelvLoc21320d106710t1	55.68	88	34	3	112	198	646	729	2e-20	90.9	198	729	44	44
AT1G30330	2	0.602	evgtrinTRINITY_DN75050c0_g2_i2	85.04	488	61	5	1	483	1	481	0	837	517	933	93	93
AT1G30330	2	0.602	evgtrinTRINITY_DN75050c0_g4_i1	91.84	343	28	0	1	343	1	343	0	647	343	933	100	100
AT1G30330	2	0.602	evgtrinTRINITY_DN75308c1_g4_i2	88.52	305	34	1	1	304	1	305	0	551	304	935	100	100
AT1G30330	2	0.602	evgtrinTRINITY_DN75308c1_g4_i5	88.86	359	39	1	1	358	1	359	0	655	358	935	100	100
AT1G30330	2	0.602	evgtrinTRINITY_DN62701c0_g1_i1	59.95	382	129	12	48	412	559	933	3e-127	394	412	933	89	89
AT3G22780	2	0.602	evgtrinTRINITY_DN73491c0_g1_i4	57.29	288	95	9	2	276	389	661	8e-91	287	282	695	98	98
AT1G30330	2	0.602	evgtrinTRINITY_DN61164c0_g1_i2	60.14	281	88	10	215	484	581	848	4e-85	284	484	933	56	56
AT1G30330	2	0.602	evgtrinTRINITY_DN61164c0_g1_i1	59.07	281	91	10	219	488	581	848	2e-84	282	488	933	55	55
AT3G22780	2	0.602	evgtrinTRINITY_DN68559c0_g2_i2	37.05	556	235	21	1	548	1	449	1e-68	237	548	695	100	100
AT3G22780	2	0.602	evgtrinTRINITY_DN74124c0_g1_i1	40.12	334	140	8	448	779	299	574	3e-62	226	1019	695	46	33
AT3G22780	2	0.602	evgtrinTRINITY_DN47977c0_g1_i1	54.67	75	34	0	1	75	20	94	1e-15	75.5	163	695	46	46
AT3G22780	2	0.602	evgtrinTRINITY_DN59322c0_g1_i3	33.73	169	60	6	139	255	250	418	2e-13	70.1	255	695	46	46
AT3G22780	2	0.602	evgvelvLoc85603d153625t1	30.13	229	117	10	1	217	29	226	4e-10	59.3	221	695	98	98
AT3G22780	2	0.602	evgvelvLoc96627d555777t1	46.88	64	32	1	10	71	12	75	3e-09	55.1	133	695	47	47
AT1G79060	3	0.601	evgtrinTRINITY_DN67681c0_g2_i1	48.04	408	145	16	1	389	1	360	2e-75	244	409	396	95	95
AT1G79060	3	0.601	evgtrinTRINITY_DN67681c0_g1_i5	48.18	411	133	16	1	382	1	360	1e-69	228	406	396	94	94
AT1G74690	2	0.601	evgtrinTRINITY_DN73368c1_g3_i5	39.14	608	293	21	1	552	1	587	1e-88	288	552	587	100	100
AT1G74690	2	0.601	evgtrinTRINITY_DN73368c1_g3_i9	37.81	603	321	20	1	565	1	587	3e-86	282	565	587	100	100
AT1G74690	2	0.601	evgtrinTRINITY_DN62836c0_g2_i7	43.13	211	104	5	3	211	163	359	8e-41	150	284	587	74	74
AT1G74690	2	0.601	evgtrinTRINITY_DN62836c0_g2_i2	41.8	122	64	3	2	121	212	328	9e-20	85.5	121	587	99	99
AT1G77870	2	0.601	evgvelvLoc105445d564638t1	38.95	95	58	0	52	146	7	101	2e-17	75.5	159	120	60	60
AT1G74690	2	0.601	evgvelvLoc15718d102483t1	41.56	77	34	2	2	67	299	375	9e-06	43.9	116	587	57	57
AT4G20050	1	0.601	evgtrinTRINITY_DN66340c1_g1_i10	65.71	455	144	2	40	493	36	479	0	607	499	481	91	91
AT4G20050	1	0.601	evgtrinTRINITY_DN71911c2_g1_i7	54.59	370	127	8	1	362	1	337	4e-123	369	362	506	100	100
AT4G20050	1	0.601	evgtrinTRINITY_DN75943c1_g3_i6utrorf	67.06	255	67	2	4	257	97	335	1e-118	353	258	506	98	98
AT5G50740	1	0.601	evgtrinTRINITY_DN63763c0_g1_i12	55.43	276	101	6	68	342	29	283	1e-84	261	342	283	80	80
AT5G50740	1	0.601	evgtrinTRINITY_DN63763c0_g1_i9	55.04	278	101	7	62	338	29	283	2e-81	253	338	283	82	82
AT4G20050	1	0.601	evgtrinTRINITY_DN75943c1_g2_i1	73.33	150	40	0	1	150	184	333	7e-75	232	150	383	100	100
AT5G50740	1	0.601	evgtrinTRINITY_DN60212c0_g2_i3	48.85	260	100	7	32	263	29	283	2e-61	199	263	283	88	88
AT5G50740	1	0.601	evgtrinTRINITY_DN63486c0_g4_i1	44.68	282	117	5	23	265	2	283	1e-60	197	265	283	92	92
AT5G50740	1	0.601	evgvelvLoc10440t2	64.29	42	12	2	33	74	245	283	5e-11	58.5	109	283	39	39
AT1G25510	4	0.599	evgtrinTRINITY_DN73083c2_g1_i1	62.68	477	165	4	16	490	18	483	0	588	490	483	97	97
AT1G01600	3	0.599	evgtrinTRINITY_DN62856c0_g1_i4	60.3	534	202	6	1	526	1	532	0	666	530	554	99	99
AT1G31650	2	0.599	evgtrinTRINITY_DN71265c0_g1_i5	58.14	571	208	10	2	548	6	569	0	617	560	576	98	98
AT3G08680	2	0.599	evgvelvLoc109185t1	31.79	151	77	5	1	142	202	335	4e-08	52	152	640	93	93
AT1G12570	3	0.598	evgtrinTRINITY_DN69782c0_g1_i7	60.85	585	193	7	6	575	8	571	0	720	579	572	98	98
AT1G12570	3	0.598	evgtrinTRINITY_DN69782c0_g2_i1	62.71	582	188	7	5	574	5	569	0	731	580	572	98	98
AT1G12570	3	0.598	evgvelvLoc90452t2	53.46	159	54	1	8	166	16	154	3e-49	169	166	572	96	96
AT1G13130	1	0.598	evgtrinTRINITY_DN70094c0_g1_i1	57.47	522	216	5	45	564	29	546	0	627	586	552	89	89
AT2G26330	1	0.598	evgtrinTRINITY_DN74045c0_g1_i2	76.84	449	104	0	1	449	282	730	0	701	449	976	100	100
AT1G13130	1	0.598	evgtrinTRINITY_DN68554c0_g1_i2	44.05	513	272	9	26	534	32	533	3e-162	478	541	552	94	94
AT2G26330	1	0.598	evgtrinTRINITY_DN70315c0_g2_i2	79.35	276	55	1	35	310	1	274	1e-150	451	310	976	89	89
AT2G26330	1	0.598	evgtrinTRINITY_DN70315c0_g2_i3	81.34	268	50	0	38	305	7	274	3e-150	450	305	976	88	88
AT1G13130	1	0.598	evgvelvLoc26339t1	55.49	173	77	0	1	173	154	326	1e-65	213	174	552	99	99
AT1G13130	1	0.598	evgvelvLoc112159d46142t1	44.59	157	79	6	1	154	387	538	6e-35	129	157	552	98	98
AT1G13130	1	0.598	evgvelvLoc118267t1	50.37	135	62	4	1	132	410	542	7e-35	129	164	552	80	80
AT2G26330	1	0.598	evgvelvLoc44233d297049t1	46.36	110	56	3	1	109	241	348	1e-16	76.6	112	976	100	97
AT2G26330	1	0.598	evgtrinTRINITY_DN62049c0_g1_i2	39.05	105	47	3	1	105	509	596	6e-10	57.4	115	976	91	91
AT3G06840	5	0.596	evgtrinTRINITY_DN60754c0_g1_i3	54.17	192	74	7	1	183	1	187	5e-51	166	183	187	100	100
AT3G06840	5	0.596	evgvelvLoc35153d492069t1	42.16	185	77	6	1	160	1	180	5e-30	110	160	187	100	100
AT3G17840	4	0.596	evgtrinTRINITY_DN73011c0_g6_i2	70.93	227	62	2	1	223	415	641	5e-113	342	241	647	93	93
AT3G17840	4	0.596	evgtrinTRINITY_DN68646c1_g2_i3	72.25	227	59	2	1	223	415	641	3e-112	340	248	647	90	90
AT3G02110	1	0.596	evgtrinTRINITY_DN64272c0_g4_i7	71.46	487	120	3	5	486	1	473	0	729	486	473	99	99
AT3G02110	1	0.596	evgtrinTRINITY_DN64272c0_g2_i7	54.74	422	177	5	5	419	1	415	2e-166	481	429	473	97	97
AT3G15095	1	0.596	evgtrinTRINITY_DN75616c3_g1_i1	47.89	332	125	14	1	295	1	321	6e-55	201	687	684	49	43
AT3G02110	1	0.596	evgtrinTRINITY_DN5116c0_g1_i1	63.2	125	45	1	1	125	350	473	9e-54	178	125	473	100	100
AT3G02110	1	0.596	evgtrinTRINITY_DN64272c0_g2_i4	63.87	119	43	0	1	119	344	462	2e-49	166	119	473	100	100
AT3G15095	1	0.596	evgtrinTRINITY_DN74722c1_g1_i1	63.04	46	17	0	50	95	349	394	1e-12	64.3	103	406	45	45
AT1G14180	2	0.595	evgtrinTRINITY_DN69196c1_g3_i4	36.14	415	140	13	5	413	27	322	3e-64	214	446	348	92	92
AT5G23420	2	0.595	evgtrinTRINITY_DN60742c0_g1_i6	50.28	181	79	4	1	172	1	179	3e-46	155	201	241	86	86
AT5G23420	2	0.595	evgtrinTRINITY_DN60742c0_g1_i7	50.28	181	79	4	1	172	1	179	3e-46	156	201	241	86	86
AT4G04020	6	0.594	evgtrinTRINITY_DN66407c0_g1_i3	69	271	82	2	62	332	48	316	6e-126	368	334	318	81	81
AT5G66590	5	0.594	evgvelvLoc114011d362643t1	63.38	142	49	3	36	175	45	185	8e-59	185	175	185	80	80
AT3G45940	3	0.593	evgtrinTRINITY_DN71852c0_g1_i7	22.49	676	397	30	220	849	99	693	1e-23	107	877	868	72	72
AT4G16130	2	0.593	evgtrinTRINITY_DN54448c0_g1_i2	83.48	333	55	0	4	336	50	382	0	584	336	1039	99	99
AT5G08260	2	0.593	evgtrinTRINITY_DN68982c1_g1_i4	62.17	423	153	3	35	450	34	456	0	556	450	480	92	92
AT4G16130	2	0.593	evgtrinTRINITY_DN73924c0_g1_i12	77.05	876	192	2	1	875	51	918	0	1391	875	1039	100	100
AT4G16130	2	0.593	evgtrinTRINITY_DN73924c0_g1_i7	80.91	812	148	2	1	811	51	856	0	1349	811	1039	100	100
AT1G11190	2	0.593	evgvelvLoc117727d175403t1	67.83	258	83	0	1	258	36	293	3e-132	381	276	305	93	93
AT1G11190	2	0.593	evgtrinTRINITY_DN71476c1_g2_i2	74.53	212	54	0	27	238	22	233	5e-121	351	238	305	89	89
AT4G16130	2	0.593	evgtrinTRINITY_DN73924c0_g1_i10utrorf	72.73	242	59	2	1	242	804	1038	2e-109	342	246	1039	98	98
AT4G16130	2	0.593	evgvelvLoc37344t1	82.35	136	24	0	1	136	632	767	1e-74	242	136	1039	100	100
AT4G16130	2	0.593	evgvelvLoc12344d467252t2	64.94	174	60	1	1	173	380	553	3e-71	234	173	1039	100	100
AT4G23860	1	0.591	evgtrinTRINITY_DN75224c1_g1_i3	48.16	490	206	9	1	481	1	451	1e-155	455	482	452	99	99
AT4G23860	1	0.591	evgvelvLoc5471d459537t2	69.08	152	43	1	1	148	11	162	1e-74	234	191	404	77	77
AT4G23860	1	0.591	evgtrinTRINITY_DN75224c1_g4_i1	71.57	102	29	0	4	105	5	106	4e-49	164	105	452	97	97
AT4G23860	1	0.591	evgtrinTRINITY_DN64319c0_g1_i2	36.7	267	130	9	1	262	136	368	3e-37	138	285	404	92	92
AT4G23860	1	0.591	evgvelvLoc103887t2	44.95	109	49	1	1	109	306	403	7e-25	97.8	110	404	99	99
AT2G37050	1	0.59	evgtrinTRINITY_DN73458c0_g1_i10	64.76	593	201	4	18	603	19	610	0	794	603	714	97	97
AT2G37050	1	0.59	evgtrinTRINITY_DN73458c0_g1_i13	65.43	619	207	5	18	630	19	636	0	841	630	714	97	97
AT2G37050	1	0.59	evgtrinTRINITY_DN73458c0_g1_i4	64.97	591	199	4	26	609	21	610	0	794	609	714	96	96
AT2G37050	1	0.59	evgtrinTRINITY_DN73458c0_g1_i6	65.64	617	205	5	26	636	21	636	0	839	636	714	96	96
AT2G37050	1	0.59	evgtrinTRINITY_DN66886c2_g2_i6	81.97	244	43	1	2	244	623	866	8e-146	435	244	933	99	99
AT2G37050	1	0.59	evgtrinTRINITY_DN66886c2_g1_i7	82.45	188	33	0	2	189	588	775	8e-109	337	207	933	91	91
AT2G37050	1	0.59	evgvelvLoc25875t4	76.88	173	40	0	10	182	572	744	4e-90	286	182	933	95	95
AT2G37050	1	0.59	evgvelvLoc63037d521461t1	68.86	167	52	0	1	167	265	431	1e-79	253	167	714	100	100
AT2G37050	1	0.59	evgvelvLoc10846d465569t1	50.44	113	54	2	38	148	821	933	6e-29	113	148	933	75	75
AT5G59010	1	0.588	evgtrinTRINITY_DN68957c0_g2_i2	78.6	486	99	3	1	484	1	483	0	798	488	489	99	99
AT5G59010	1	0.588	evgtrinTRINITY_DN68957c0_g2_i4	81.71	492	80	4	1	485	1	489	0	841	485	489	100	100
AT5G59010	1	0.588	evgtrinTRINITY_DN68957c0_g2_i6	79.88	492	93	4	1	489	1	489	0	821	489	489	100	100
AT5G59010	1	0.588	evgvelvLoc16633t6	73.79	145	37	1	2	145	184	328	1e-74	230	145	359	99	99
AT1G49430	5	0.587	evgtrinTRINITY_DN69502c0_g1_i2	66.05	433	145	2	1	431	229	661	0	635	435	665	99	99
AT1G49430	5	0.587	evgvelvLoc24563t6	56.43	280	113	2	8	286	11	282	1e-107	326	286	522	98	98
AT1G49430	5	0.587	evgvelvLoc169678t1	53.41	88	40	1	12	98	172	259	4e-24	97.1	104	522	84	84
AT1G15360	3	0.587	evgtrinTRINITY_DN70667c0_g1_i2	65.5	200	56	4	1	188	1	199	3e-79	239	210	199	90	90
AT4G32710	1	0.586	evgvelvLoc102544d352378t1	35.05	97	42	5	86	178	322	401	7e-07	48.9	178	731	52	52
AT5G51810	2	0.585	evgtrinTRINITY_DN61545c0_g1_i1	53.19	361	163	2	16	375	19	374	1e-133	392	379	378	95	95
AT3G61830	1	0.585	evgtrinTRINITY_DN72476c2_g4_i1	82.44	131	23	0	1	131	143	273	1e-72	230	133	551	98	98
AT3G61830	1	0.585	evgvelvLoc62944t3	49.12	57	23	2	98	148	12	68	1e-08	53.9	178	602	29	29
AT3G19620	3	0.584	evgtrinTRINITY_DN71318c0_g1_i1	64.67	801	257	6	1	797	3	781	0	1066	800	781	99	99
AT3G44610	3	0.584	evgtrinTRINITY_DN75467c1_g2_i1	64.87	464	129	8	3	445	1	451	0	548	445	451	99	99
AT3G19620	3	0.584	evgvelvLoc103045d352833t1	67.43	175	56	1	1	174	322	496	1e-75	244	174	781	100	100
AT4G22140	2	0.584	evgtrinTRINITY_DN67104c0_g1_i1	78.12	224	41	1	1	216	1	224	8e-134	379	216	224	100	100
AT4G22140	2	0.584	evgtrinTRINITY_DN70705c5_g2_i9	77.48	222	42	1	1	214	1	222	4e-129	370	276	224	78	78
AT4G35020	2	0.584	evgtrinTRINITY_DN65195c0_g1_i6	82.83	198	32	1	1	196	1	198	9e-118	337	196	198	100	100
AT4G35020	2	0.584	evgtrinTRINITY_DN68479c0_g3_i5	94.51	164	9	0	1	164	1	164	1e-116	332	164	198	100	100
AT4G22140	2	0.584	evgtrinTRINITY_DN66559c0_g1_i6	65.49	226	69	2	1	217	1	226	2e-109	318	229	234	95	95
AT4G22140	2	0.584	evgtrinTRINITY_DN66559c0_g2_i6	68.92	148	38	1	34	173	1	148	1e-73	226	204	234	69	69
AT4G22140	2	0.584	evgvelvLoc142398t1	83.48	115	16	1	1	115	73	184	3e-70	214	130	224	88	88
AT4G35020	2	0.584	evgtrinTRINITY_DN63023c1_g5_i2	79.78	89	18	0	1	89	93	181	2e-48	156	104	198	86	86
AT1G76540	1	0.584	evgtrinTRINITY_DN65881c0_g1_i2	86.76	136	18	0	11	146	9	144	3e-85	257	163	313	83	83
AT1G76540	1	0.584	evgtrinTRINITY_DN65881c0_g1_i6	86.76	136	18	0	11	146	9	144	4e-85	256	155	313	88	88
AT1G76540	1	0.584	evgtrinTRINITY_DN73290c1_g3_i5	81.94	144	26	0	1	144	153	296	1e-84	254	145	313	99	99
AT1G76540	1	0.584	evgtrinTRINITY_DN65881c0_g1_i1	86.03	136	19	0	49	184	9	144	4e-84	256	202	313	67	67
AT1G76540	1	0.584	evgtrinTRINITY_DN73290c0_g2_i1	79.31	29	6	0	20	48	212	240	5e-08	49.7	88	313	33	33
AT1G01370	1	0.583	evgtrinTRINITY_DN68670c1_g1_i2	50	180	66	3	1	159	1	177	7e-49	159	160	178	99	99
AT1G01370	1	0.583	evgtrinTRINITY_DN68670c1_g1_i4	49.7	165	65	5	1	147	1	165	4e-39	134	172	178	85	85
AT3G51740	1	0.581	evgtrinTRINITY_DN69493c0_g2_i2	48.66	633	281	10	40	641	191	810	0	543	649	836	99	93
AT1G76310	1	0.581	evgtrinTRINITY_DN70341c1_g1_i10	63.91	435	142	8	1	425	1	430	0	546	428	431	99	99
AT3G51740	1	0.581	evgtrinTRINITY_DN73061c0_g1_i2	65.2	793	256	5	61	848	33	810	0	978	869	836	91	91
AT1G76310	1	0.581	evgvelvLoc30055d486599t1	55.27	313	86	9	1	260	1	312	3e-101	303	260	339	100	100
AT1G76310	1	0.581	evgtrinTRINITY_DN70341c1_g2_i5	75.29	170	42	0	1	170	261	430	2e-87	266	174	431	98	98
AT1G76310	1	0.581	evgtrinTRINITY_DN69510c0_g1_i5	50.7	286	82	9	1	229	1	284	9e-80	246	229	339	100	100
AT1G76310	1	0.581	evgvelvLoc70125d528805t1	63.79	174	58	1	10	178	192	365	8e-69	218	180	387	94	94
AT3G51740	1	0.581	evgtrinTRINITY_DN73061c0_g1_i1	65.69	102	33	1	1	102	336	435	2e-35	130	111	836	92	92
AT3G51740	1	0.581	evgtrinTRINITY_DN60512c1_g3_i1	38.83	103	62	1	1	103	286	387	7e-16	74.3	104	836	100	99
AT1G76310	1	0.581	evgvelvLoc10003d464644t2	58.82	51	18	2	101	150	1	49	3e-10	58.2	151	459	33	33
AT5G62390	1	0.58	evgtrinTRINITY_DN65152c0_g1_i2	69.82	169	48	1	41	206	278	446	5e-76	239	216	446	77	77
AT5G62390	1	0.58	evgtrinTRINITY_DN65152c0_g1_i3	68.64	169	50	1	41	206	278	446	2e-74	235	216	446	77	77
AT5G62390	1	0.58	evgvelvLoc3285d92349t1	40	100	39	4	15	114	29	107	7e-10	56.6	130	446	77	77
AT1G52310	2	0.579	evgtrinTRINITY_DN65860c0_g1_i2	65.58	430	141	6	26	451	44	470	0	553	451	552	94	94
AT1G52310	2	0.579	evgvelvLoc22759t2	76.32	114	25	2	2	113	355	468	1e-53	179	163	475	69	69
AT4G21630	2	0.579	evgtrinTRINITY_DN74581c0_g1_i1	62.79	129	43	2	1	125	253	380	3e-40	144	125	759	100	100
AT1G23010	4	0.578	evgtrinTRINITY_DN69415c0_g2_i2	68.36	572	178	2	1	570	10	580	0	852	571	581	99	99
AT1G23010	4	0.578	evgtrinTRINITY_DN69415c0_g2_i3	64.64	280	98	1	1	280	10	288	2e-136	402	285	581	98	98
AT1G23010	4	0.578	evgvelvLoc118519d175923t1	55.32	141	61	1	3	141	441	581	2e-52	177	141	581	99	99
AT4G15790	3	0.578	evgtrinTRINITY_DN64893c0_g4_i1	64.1	117	39	1	1	114	1	117	3e-44	145	149	147	77	77
AT5G05670	2	0.578	evgtrinTRINITY_DN69882c0_g3_i2	68.46	260	81	1	1	259	1	260	1e-132	380	259	260	100	100
AT5G05670	2	0.578	evgtrinTRINITY_DN69882c0_g2_i4	68.65	185	57	1	1	184	1	185	2e-89	266	184	260	100	100
AT1G75290	2	0.578	evgtrinTRINITY_DN66640c0_g1_i2	36.99	319	196	3	10	325	2	318	4e-72	231	384	318	82	82
AT2G42840	2	0.578	evgtrinTRINITY_DN68594c0_g4_i10	56	175	60	4	84	243	134	306	3e-50	169	243	306	66	66
AT1G75290	2	0.578	evgtrinTRINITY_DN66640c0_g1_i8	37.31	193	116	3	62	251	29	219	1e-37	139	297	345	64	64
AT1G75290	2	0.578	evgvelvLoc109094t1	66.67	24	8	0	49	72	256	279	4e-05	40.8	78	318	31	31
AT2G42840	2	0.578	evgvelvLoc12579t1	47.06	51	22	3	77	125	1	48	0.0007	38.5	139	306	35	35
AT3G23730	1	0.578	evgtrinTRINITY_DN72814c1_g1_i9	72.79	283	76	1	10	291	8	290	1e-159	451	293	291	96	96
AT3G23730	1	0.578	evgtrinTRINITY_DN72814c1_g1_i1	72.6	281	76	1	12	291	10	290	2e-158	448	293	291	96	96
AT3G23730	1	0.578	evgtrinTRINITY_DN72814c1_g1_i3	71.38	283	80	1	10	291	8	290	1e-157	446	293	291	96	96
AT3G23730	1	0.578	evgtrinTRINITY_DN72814c1_g1_i11	72.49	269	73	1	12	279	10	278	9e-150	425	279	291	96	96
AT3G23730	1	0.578	evgvelvLoc88271d547334t1	72.61	241	61	2	9	247	10	247	1e-128	370	252	291	95	95
AT3G23730	1	0.578	evgtrinTRINITY_DN72814c1_g1_i10	77	200	46	0	11	210	9	208	4e-119	344	210	291	95	95
AT3G23730	1	0.578	evgtrinTRINITY_DN62108c0_g1_i3	66.67	201	66	1	1	201	89	288	1e-98	292	201	291	100	100
AT3G23730	1	0.578	evgvelvLoc139396d188707t1	72.66	139	38	0	1	139	101	239	1e-73	226	140	291	99	99
AT1G71830	3	0.577	evgtrinTRINITY_DN74818c0_g2_i5	88.96	589	64	1	4	591	1	589	0	978	591	625	99	99
AT1G71830	3	0.577	evgtrinTRINITY_DN74818c0_g3_i5	86.21	602	81	2	4	603	1	602	0	982	604	625	99	99
AT4G09460	2	0.577	evgtrinTRINITY_DN62756c0_g2_i3	55.02	209	70	6	2	194	3	203	2e-73	227	234	236	82	82
AT4G09460	2	0.577	evgtrinTRINITY_DN54713c0_g1_i2	91.11	45	4	0	60	104	1	45	7e-26	99	110	236	41	41
AT4G09460	2	0.577	evgvelvLoc142931d190684t1	32.62	141	75	6	1	134	95	222	6e-08	52.4	224	236	60	60
AT3G57830	1	0.577	evgtrinTRINITY_DN71216c1_g1_i3	58.26	484	183	8	2	467	177	659	4e-180	524	470	662	99	99
AT5G10770	2	0.576	evgtrinTRINITY_DN65745c0_g1_i1	55.64	417	180	4	69	484	62	474	1e-159	466	484	474	86	86
AT5G10770	2	0.576	evgtrinTRINITY_DN65745c0_g1_i2	54.92	417	183	4	69	484	62	474	5e-159	464	484	474	86	86
AT5G10770	2	0.576	evgtrinTRINITY_DN73444c1_g1_i3	48.46	421	208	6	69	482	56	474	3e-127	382	482	474	86	86
AT5G10770	2	0.576	evgtrinTRINITY_DN73444c1_g1_i2	48.68	380	186	6	68	440	56	433	8e-115	349	440	474	85	85
AT5G10770	2	0.576	evgtrinTRINITY_DN64513c2_g1_i4	53.75	307	135	5	73	373	62	367	3e-105	322	373	474	81	81
AT5G10770	2	0.576	evgtrinTRINITY_DN70601c4_g2_i2	41.34	433	228	10	42	465	58	473	7e-102	317	466	474	91	91
AT5G10770	2	0.576	evgvelvLoc115677d174096t1	47.18	337	173	5	1	335	141	474	6e-94	291	335	474	100	100
AT5G10770	2	0.576	evgtrinTRINITY_DN70601c2_g1_i2	53.25	246	108	6	1	241	124	367	3e-72	231	241	474	100	100
AT5G10770	2	0.576	evgvelvLoc50600d508487t1	48.31	236	118	4	1	233	67	301	7e-66	214	238	474	98	98
AT5G10770	2	0.576	evgtrinTRINITY_DN73444c1_g1_i4	46	200	101	4	32	224	56	255	4e-52	178	225	474	86	86
AT5G10770	2	0.576	evgvelvLoc14382t2	58.54	123	51	0	1	123	352	474	6e-45	154	123	474	100	100
AT5G10770	2	0.576	evgtrinTRINITY_DN73444c1_g2_i1	50	148	74	0	1	148	327	474	2e-42	149	148	474	100	100
AT5G10770	2	0.576	evgtrinTRINITY_DN73444c1_g2_i2	50	136	68	0	3	138	305	440	1e-37	135	138	474	99	99
AT5G10770	2	0.576	evgtrinTRINITY_DN64513c1_g1_i2	51.11	135	65	1	2	135	339	473	4e-36	130	136	474	99	99
AT5G10770	2	0.576	evgvelvLoc11430t1	48.51	134	63	3	1	128	65	198	7e-34	124	128	474	100	100
AT5G10770	2	0.576	evgvelvLoc55517t2	48.33	120	62	0	1	120	355	474	5e-32	119	120	474	100	100
AT5G10770	2	0.576	evgvelvLoc109355d568556t1	48.6	107	52	3	1	105	67	172	2e-26	103	105	474	100	100
AT5G48500	2	0.576	evgtrinTRINITY_DN70146c1_g1_i9	36.36	143	74	6	73	203	12	149	6e-16	73.9	253	167	52	52
AT5G10770	2	0.576	evgvelvLoc172574d64040t1	41.3	92	48	3	15	100	56	147	1e-14	70.1	101	474	85	85
AT5G10770	2	0.576	evgvelvLoc13066t1	43.84	73	37	2	43	111	62	134	2e-11	60.8	111	474	62	62
AT3G13690	1	0.576	evgtrinTRINITY_DN75451c1_g1_i7	72.74	532	142	3	1	530	170	700	0	795	530	753	100	100
AT3G13690	1	0.576	evgtrinTRINITY_DN75451c1_g1_i8	69.53	384	114	3	1	382	170	552	0	535	410	753	93	93
AT1G19850	1	0.576	evgvelvLoc13385d468406t1	74.02	458	102	5	1	444	5	459	0	692	567	902	78	78
AT1G19850	1	0.576	evgvelvLoc37097t1	77.27	396	85	2	1	391	45	440	0	635	391	891	100	100
AT1G19850	1	0.576	evgtrinTRINITY_DN75875c1_g3_i1	85.89	241	33	1	2	241	131	371	3e-145	432	241	891	99	99
AT3G13690	1	0.576	evgtrinTRINITY_DN68768c0_g1_i2	41.15	610	300	11	68	638	102	691	1e-137	425	669	753	85	85
AT3G13690	1	0.576	evgtrinTRINITY_DN75451c0_g2_i1	60.58	345	122	5	1	331	39	383	5e-128	387	331	753	100	100
AT1G19850	1	0.576	evgtrinTRINITY_DN75875c1_g3_i4	87.32	205	25	1	2	205	142	346	6e-122	370	205	902	99	99
AT3G13690	1	0.576	evgtrinTRINITY_DN62687c0_g1_i3	72.56	215	52	1	1	215	537	744	1e-104	322	221	753	97	97
AT1G19850	1	0.576	evgtrinTRINITY_DN75875c1_g2_i6	60.54	185	62	8	1	175	678	861	4e-58	196	175	902	100	100
AT1G19850	1	0.576	evgvelvLoc29257d485733t1	70.59	119	34	1	1	118	773	891	3e-54	184	128	891	92	92
AT3G13690	1	0.576	evgvelvLoc29660d486172t1	66.91	136	41	1	1	132	106	241	1e-50	172	132	753	100	100
AT1G19850	1	0.576	evgtrinTRINITY_DN72932c0_g1_i3	76.92	91	20	1	21	110	70	160	7e-43	151	110	891	82	82
AT1G19850	1	0.576	evgtrinTRINITY_DN67371c1_g2_i1	57.14	140	49	7	4	132	676	815	7e-34	127	132	902	98	98
AT1G19850	1	0.576	evgtrinTRINITY_DN67371c1_g1_i4	27.81	356	195	14	4	349	370	673	4e-18	87	385	891	90	90
AT1G19850	1	0.576	evgtrinTRINITY_DN67371c1_g1_i6	30.51	354	189	16	4	350	370	673	2e-16	81.6	386	891	90	90
AT1G19850	1	0.576	evgvelvLoc36217d289184t1	63.89	36	13	0	18	53	845	880	2e-09	55.8	122	891	30	30
AT1G30440	2	0.575	evgtrinTRINITY_DN74228c0_g1_i1	72.82	666	149	12	10	644	1	665	0	959	644	665	99	99
AT1G30440	2	0.575	evgtrinTRINITY_DN74228c0_g3_i1	72.65	501	132	4	10	505	1	501	0	759	505	665	98	98
AT1G30440	2	0.575	evgtrinTRINITY_DN70369c1_g3_i1	34.9	553	292	10	3	494	69	614	1e-86	284	515	665	96	96
AT1G30440	2	0.575	evgtrinTRINITY_DN69955c0_g1_i1	68.97	174	29	7	1	150	485	657	7e-60	199	156	665	96	96
AT1G30440	2	0.575	evgvelvLoc25704t1	45.45	55	21	3	43	96	173	219	0.0001	40.8	128	665	42	42
AT2G37630	1	0.575	evgtrinTRINITY_DN71354c0_g1_i1	65.04	369	105	8	1	351	1	363	1e-152	439	362	367	97	97
AT2G37630	1	0.575	evgtrinTRINITY_DN65408c1_g2_i1	47.52	404	146	7	1	380	1	362	3e-107	324	396	367	96	96
AT4G04890	3	0.574	evgtrinTRINITY_DN63022c0_g1_i5	74.88	410	95	8	60	463	31	438	0	628	463	743	87	87
AT4G04890	3	0.574	evgtrinTRINITY_DN71680c0_g2_i2	76.93	711	138	13	14	704	31	735	0	1097	704	743	98	98
AT4G04890	3	0.574	evgtrinTRINITY_DN71680c0_g2_i4	77.17	714	138	12	14	708	31	738	0	1105	710	743	98	98
AT1G09155	3	0.574	evgtrinTRINITY_DN56585c0_g1_i3	47.31	279	139	4	7	279	3	279	4e-80	248	284	289	96	96
AT1G09155	3	0.574	evgtrinTRINITY_DN56585c0_g1_i1	47.19	267	133	4	2	262	19	283	4e-73	229	262	289	99	99
AT1G09155	3	0.574	evgtrinTRINITY_DN70232c3_g2_i2	43.14	306	142	7	6	306	2	280	6e-73	230	309	289	97	97
AT1G09155	3	0.574	evgtrinTRINITY_DN70232c3_g2_i1	42.7	267	124	6	11	275	2	241	1e-62	202	279	289	95	95
AT1G09155	3	0.574	evgtrinTRINITY_DN70232c3_g2_i5	42.32	267	125	6	11	275	2	241	4e-62	201	279	289	95	95
AT5G50610	2	0.574	evgtrinTRINITY_DN71936c1_g4_i5	30.05	193	107	6	1	188	1	170	2e-18	80.5	193	185	97	97
AT5G50610	2	0.574	evgtrinTRINITY_DN63364c2_g5_i2	33.12	157	73	6	39	191	46	174	4e-12	62.4	193	185	79	79
AT5G50610	2	0.574	evgtrinTRINITY_DN63364c2_g5_i1	36.67	60	34	2	76	135	46	101	1e-05	44.7	193	185	31	31
AT2G02170	1	0.574	evgtrinTRINITY_DN69472c0_g5_i1	54.61	531	179	20	1	514	1	486	4e-153	451	514	486	100	100
AT2G02170	1	0.574	evgtrinTRINITY_DN69472c0_g4_i8	55.35	486	156	19	1	474	1	437	1e-146	432	480	486	99	99
AT5G66330	4	0.573	evgtrinTRINITY_DN63750c0_g1_i2	59.7	402	159	2	25	424	18	418	1e-167	482	424	418	94	94
AT5G66330	4	0.573	evgtrinTRINITY_DN63750c0_g1_i1	58.23	316	130	1	1	314	103	418	1e-121	360	314	418	100	100
AT2G03070	1	0.573	evgtrinTRINITY_DN68877c0_g1_i1	58.06	527	193	12	23	537	14	524	6e-171	499	543	524	95	95
AT4G14200	3	0.572	evgtrinTRINITY_DN75155c0_g1_i2	36.44	118	61	3	1	107	1	115	1e-13	75.5	934	784	11	11
AT4G14200	3	0.572	evgvelvLoc16446d471835t1	29.08	141	83	6	29	164	653	781	6e-06	45.8	169	784	80	80
AT1G07790	1	0.572	evgtrinTRINITY_DN57598c1_g2_i1	53.08	130	53	3	69	192	20	147	2e-37	130	192	148	65	65
AT5G56220	1	0.571	evgtrinTRINITY_DN73110c0_g2_i1	67.04	892	282	9	3	887	87	973	0	1210	887	973	99	99
AT5G63950	1	0.571	evgtrinTRINITY_DN74924c0_g1_i2	55.31	998	393	17	57	1017	107	1088	0	999	1017	1090	94	94
AT2G16270	1	0.571	evgtrinTRINITY_DN75234c0_g1_i5	29.45	567	258	22	16	560	17	463	2e-31	132	829	759	72	66
AT2G16270	1	0.571	evgtrinTRINITY_DN65662c0_g1_i1	26.64	304	159	12	19	266	42	337	5e-08	57	730	759	34	34
AT5G63950	1	0.571	evgvelvLoc56535t2	60	35	14	0	1	35	667	701	1e-05	43.1	70	1090	50	50
AT1G02730	1	0.57	evgtrinTRINITY_DN72013c0_g1_i2	84.06	853	132	3	1	850	321	1172	0	1510	852	1181	99	99
AT1G02730	1	0.57	evgvelvLoc79426d149245t1	78.14	183	39	1	3	184	780	962	2e-96	306	184	1181	99	99
AT1G02730	1	0.57	evgtrinTRINITY_DN31841c0_g1_i1	75.76	165	38	1	1	165	1019	1181	1e-85	275	165	1181	100	100
AT1G67040	1	0.57	evgtrinTRINITY_DN72348c0_g1_i1	30.22	1016	494	40	1	992	1	825	3e-83	290	1003	826	99	99
AT1G02730	1	0.57	evgtrinTRINITY_DN73277c0_g1_i1	51.26	277	107	12	1	256	1	270	1e-67	229	256	1181	100	100
AT1G02730	1	0.57	evgvelvLoc398731t1	85.71	112	16	0	1	112	321	432	8e-63	208	112	1181	100	100
AT3G26125	1	0.57	evgvelvLoc135836d381567t1	60.81	148	58	0	1	148	85	232	8e-60	196	148	541	100	100
AT1G44780	1	0.57	evgtrinTRINITY_DN72463c3_g3_i3	51.22	164	68	1	38	201	263	414	3e-43	154	227	463	72	72
AT4G34400	1	0.57	evgtrinTRINITY_DN73051c0_g2_i1	43.96	91	51	0	13	103	14	104	2e-18	87.8	529	397	17	17
AT5G51750	4	0.569	evgtrinTRINITY_DN70331c0_g2_i1	69.04	772	236	2	8	778	11	780	0	1100	778	780	99	99
AT1G28710	3	0.569	evgtrinTRINITY_DN62511c0_g2_i5	53.87	349	139	7	5	351	3	331	2e-116	345	361	340	96	96
AT1G28710	3	0.569	evgtrinTRINITY_DN62511c0_g3_i1	58.76	291	112	4	4	293	50	333	7e-116	342	293	340	99	99
AT1G28710	3	0.569	evgtrinTRINITY_DN73030c0_g3_i10	51.36	331	143	7	25	349	13	331	2e-111	332	351	340	93	93
AT1G28710	3	0.569	evgtrinTRINITY_DN64673c0_g1_i1	49.57	345	155	7	7	350	5	331	3e-107	322	350	340	98	98
AT1G28710	3	0.569	evgtrinTRINITY_DN73030c0_g2_i3	51.52	328	145	6	18	343	16	331	4e-107	321	345	340	94	94
AT1G28710	3	0.569	evgvelvLoc72281d144064t1	52.42	124	56	1	23	146	211	331	1e-38	136	148	340	84	84
AT4G25700	2	0.569	evgtrinTRINITY_DN65968c1_g1_i10	72.44	254	63	2	53	299	43	296	3e-136	392	305	310	81	81
AT4G25700	2	0.569	evgtrinTRINITY_DN68945c0_g1_i6	66.67	291	74	7	1	283	1	276	8e-128	372	331	310	85	85
AT1G45190	2	0.569	evgvelvLoc264225d81120t1	23.95	167	97	7	10	155	5	162	1e-08	52	162	172	90	90
AT1G45190	2	0.569	evgvelvLoc124394t1	26.97	89	54	4	48	135	80	158	0.0001	40.4	141	172	62	62
AT1G51440	2	0.567	evgtrinTRINITY_DN74165c3_g1_i2	73.68	437	104	6	72	500	85	518	0	659	505	527	85	85
AT1G51440	2	0.567	evgtrinTRINITY_DN71745c0_g1_i1	74.35	230	54	2	136	360	87	316	3e-117	354	360	527	63	63
AT1G51440	2	0.567	evgvelvLoc117389d576596t1	76.16	172	37	1	2	169	317	488	6e-92	281	169	527	99	99
AT1G51440	2	0.567	evgvelvLoc123468d582660t1	76.16	172	37	1	2	169	317	488	1e-91	280	169	527	99	99
AT5G04770	2	0.566	evgtrinTRINITY_DN70956c0_g1_i13	57.37	434	177	3	16	442	21	453	2e-172	501	442	583	97	97
AT5G04770	2	0.566	evgtrinTRINITY_DN46560c0_g2_i1	47.3	148	71	3	1	144	273	417	1e-32	121	160	436	90	90
AT1G78170	6	0.565	evgtrinTRINITY_DN61008c0_g2_i1	35.52	183	71	6	49	201	55	220	9e-20	85.1	201	221	76	76
AT1G78170	6	0.565	evgtrinTRINITY_DN58093c0_g1_i1	33.8	216	89	9	46	223	22	221	1e-18	82.4	226	221	79	79
AT1G78170	6	0.565	evgtrinTRINITY_DN61583c0_g1_i3	29.17	168	59	5	76	195	52	207	2e-09	56.2	223	221	54	54
AT3G11000	5	0.565	evgtrinTRINITY_DN63189c0_g2_i4	58.17	153	64	0	31	183	1	153	2e-56	195	372	488	41	41
AT1G14840	2	0.565	evgtrinTRINITY_DN62519c0_g1_i2	84.15	246	35	3	44	286	11	255	9e-136	400	286	589	85	85
AT1G14840	2	0.565	evgtrinTRINITY_DN73921c1_g3_i4	73.36	259	56	4	12	262	3	256	4e-120	359	262	589	96	96
AT1G18370	1	0.565	evgtrinTRINITY_DN73609c0_g1_i4	72.57	977	245	11	1	957	1	974	0	1412	957	974	100	100
AT1G18370	1	0.565	evgvelvLoc72719d324594t1	78.27	382	77	3	1	376	202	583	0	582	377	974	99	99
AT1G18370	1	0.565	evgtrinTRINITY_DN73609c0_g4_i1	68.35	376	109	6	1	368	601	974	5e-179	527	368	974	100	100
AT1G18370	1	0.565	evgtrinTRINITY_DN73609c0_g2_i1	81.44	264	47	2	1	262	1	264	2e-146	438	262	974	100	100
AT1G08560	1	0.565	evgtrinTRINITY_DN68638c0_g1_i3	65.94	320	95	5	1	316	1	310	5e-133	385	316	310	100	100
AT1G18370	1	0.565	evgvelvLoc45722t1	80.67	119	21	2	4	121	65	182	8e-56	188	121	974	98	98
AT4G34980	5	0.564	evgtrinTRINITY_DN71306c0_g1_i8	43.51	717	363	18	11	697	54	758	0	557	708	764	97	97
AT4G34980	5	0.564	evgtrinTRINITY_DN71629c0_g1_i1	72.1	785	196	7	18	800	1	764	0	1165	800	764	98	98
AT4G34980	5	0.564	evgvelvLoc23928d480003t1	70.04	227	65	3	1	225	539	764	2e-106	327	225	764	100	100
AT4G34980	5	0.564	evgvelvLoc60040d312436t2	71.23	146	35	1	1	146	133	271	3e-68	223	153	764	95	95
AT4G34980	5	0.564	evgvelvLoc36364d493371t1	83.78	111	18	0	1	111	383	493	9e-59	194	111	764	100	100
AT4G34980	5	0.564	evgvelvLoc37606d494716t1	47.54	61	25	2	23	83	1	54	7e-10	56.6	104	764	59	59
AT2G22610	1	0.564	evgtrinTRINITY_DN75113c0_g2_i11	64.97	805	279	1	54	858	51	852	0	1096	872	1084	92	92
AT4G15480	1	0.564	evgtrinTRINITY_DN67009c0_g1_i2	52.63	475	213	6	8	479	18	483	5e-172	499	523	490	90	90
AT2G22610	1	0.564	evgtrinTRINITY_DN65367c0_g1_i2	37.94	253	112	14	3	241	863	1084	1e-23	101	241	1084	100	99
AT2G26440	2	0.563	evgtrinTRINITY_DN59900c0_g1_i1	66.06	330	100	2	3	332	230	547	3e-161	466	332	547	99	99
AT2G26440	2	0.563	evgtrinTRINITY_DN55769c0_g1_i1	55.95	168	65	3	31	190	39	205	7e-54	183	199	547	80	80
AT2G26440	2	0.563	evgvelvLoc84911d543924t1	75	104	26	0	1	104	326	429	5e-51	171	104	547	100	100
AT5G27740	1	0.563	evgtrinTRINITY_DN62719c0_g5_i2	84.18	354	56	0	1	354	1	354	0	649	354	354	100	100
AT3G13560	1	0.563	evgtrinTRINITY_DN74713c1_g1_i2	66.36	434	145	1	22	454	22	455	0	606	495	505	87	87
AT3G13560	1	0.563	evgvelvLoc349d453699t1	73.25	228	61	0	1	228	64	291	3e-120	355	228	505	100	100
AT3G13560	1	0.563	evgtrinTRINITY_DN60444c0_g1_i1	57.85	242	98	3	1	241	240	478	8e-97	296	256	505	94	94
AT5G03670	1	0.563	evgtrinTRINITY_DN69039c1_g2_i3	40.53	570	261	18	4	559	7	512	4e-85	277	562	516	99	99
AT5G03670	1	0.563	evgtrinTRINITY_DN69039c1_g2_i4	42.96	412	181	13	4	402	7	377	8e-70	232	414	516	96	96
AT5G03670	1	0.563	evgvelvLoc41178d121200t1	44.94	178	86	6	2	175	3	172	4e-36	134	225	423	77	77
AT5G03670	1	0.563	evgvelvLoc90250d156862t1	36.23	265	119	5	1	247	278	510	4e-20	90.1	252	516	98	98
AT3G13510	1	0.562	evgtrinTRINITY_DN66964c0_g1_i7	76.16	323	77	0	19	341	15	337	0	536	341	419	95	95
AT1G44900	1	0.562	evgtrinTRINITY_DN73587c0_g1_i3	76.27	923	202	8	17	936	20	928	0	1383	941	936	98	98
AT3G13510	1	0.562	evgtrinTRINITY_DN72675c0_g1_i6	59.1	335	130	6	1	332	89	419	2e-141	411	332	419	100	100
AT3G13510	1	0.562	evgtrinTRINITY_DN72675c0_g1_i10	65.85	123	40	2	1	122	298	419	8e-51	169	122	419	100	100
AT1G78570	4	0.561	evgtrinTRINITY_DN68669c0_g2_i8	88.08	671	77	3	1	670	1	669	0	1238	673	669	99	99
AT1G78570	4	0.561	evgtrinTRINITY_DN68742c0_g1_i1	76.65	668	147	3	5	664	2	668	0	1080	668	669	99	99
AT2G40540	3	0.561	evgtrinTRINITY_DN74111c2_g1_i10	74.2	469	104	5	7	468	336	794	0	708	468	794	99	99
AT2G40540	3	0.561	evgtrinTRINITY_DN74111c2_g1_i16	83.18	434	73	0	1	434	28	461	0	750	434	794	100	100
AT2G40540	3	0.561	evgtrinTRINITY_DN74111c2_g1_i3	83.67	441	72	0	1	441	21	461	0	764	441	794	100	100
AT2G40540	3	0.561	evgtrinTRINITY_DN74111c2_g1_i9	84.62	286	44	0	1	286	21	306	2e-171	498	286	794	100	100
AT2G40540	3	0.561	evgtrinTRINITY_DN57140c0_g1_i1	83.74	203	33	0	1	203	402	604	8e-117	354	203	794	100	100
AT2G40540	3	0.561	evgtrinTRINITY_DN74111c1_g1_i1	57.28	213	74	7	1	205	591	794	9e-69	227	205	794	100	100
AT2G40540	3	0.561	evgvelvLoc20294t2	55.45	101	28	3	5	104	6	90	2e-23	95.5	104	794	96	96
AT2G40540	3	0.561	evgvelvLoc92416t1	47.22	108	55	2	1	107	408	514	4e-22	92.4	109	794	98	98
AT2G35340	2	0.561	evgvelvLoc5546t2	76.88	160	35	1	1	160	572	729	8e-81	259	160	906	100	100
AT2G35340	2	0.561	evgvelvLoc51451d509383t2	53.93	191	85	2	5	194	4	192	2e-55	191	194	1044	98	98
AT2G35340	2	0.561	evgtrinTRINITY_DN30180c0_g1_i1	67.23	119	39	0	1	119	775	893	3e-54	183	119	906	100	100
AT3G25980	1	0.56	evgtrinTRINITY_DN72073c0_g4_i1	84.54	207	31	1	1	206	1	207	9e-129	365	206	209	100	100
AT4G24790	2	0.559	evgtrinTRINITY_DN75412c0_g3_i1	54.79	626	227	13	195	808	147	728	0	587	809	815	83	76
AT4G24790	2	0.559	evgtrinTRINITY_DN75412c0_g4_i2	56.03	605	234	10	110	708	169	747	0	610	928	815	65	65
AT4G24790	2	0.559	evgvelvLoc68744d141510t1	56.76	74	29	2	1	71	674	747	3e-16	75.5	114	815	62	62
AT4G24790	2	0.559	evgtrinTRINITY_DN75412c0_g1_i1	53.7	54	25	0	1	54	1	54	3e-13	68.2	162	815	33	33
AT4G24790	2	0.559	evgtrinTRINITY_DN75412c0_g3_i3	53.7	54	25	0	1	54	1	54	8e-12	65.5	255	815	21	21
AT1G26780	1	0.559	evgtrinTRINITY_DN58697c0_g1_i3	46.62	296	117	9	84	369	95	359	5e-69	224	369	359	78	78
AT5G13930	4	0.558	evgtrinTRINITY_DN13389c0_g1_i1	65.36	384	131	2	4	386	12	394	0	532	392	395	98	98
AT5G19730	4	0.558	evgtrinTRINITY_DN59889c0_g1_i4	75.9	361	87	0	19	379	23	383	0	595	379	383	95	95
AT5G13930	4	0.558	evgtrinTRINITY_DN67233c0_g1_i2	85.49	386	55	1	3	387	8	393	0	693	389	395	99	99
AT5G13930	4	0.558	evgtrinTRINITY_DN67233c0_g3_i2	60.15	389	153	2	3	390	8	395	3e-174	496	391	395	99	99
AT5G13930	4	0.558	evgtrinTRINITY_DN67233c0_g3_i4	59.13	389	157	2	3	390	8	395	4e-170	486	394	395	98	98
AT5G13930	4	0.558	evgtrinTRINITY_DN67233c0_g2_i1	86.88	221	28	1	1	220	173	393	2e-137	395	222	395	99	99
AT5G13930	4	0.558	evgtrinTRINITY_DN67233c0_g2_i2	86.36	220	29	1	1	219	174	393	2e-136	392	221	395	99	99
AT5G13930	4	0.558	evgtrinTRINITY_DN53665c0_g1_i2	84.9	192	29	0	3	194	8	199	9e-122	354	194	395	99	99
AT5G13930	4	0.558	evgtrinTRINITY_DN67233c0_g1_i4	87.7	187	22	1	2	187	70	256	1e-117	343	187	395	99	99
AT5G13930	4	0.558	evgvelvLoc51636d509576t1	64.73	241	83	2	1	240	81	320	4e-113	334	240	395	100	100
AT5G13930	4	0.558	evgvelvLoc913t11	67.84	227	70	2	3	229	8	231	5e-110	326	229	395	99	99
AT5G13930	4	0.558	evgvelvLoc62175d314505t1	66.06	218	72	2	1	217	103	319	3e-103	308	218	395	99	99
AT5G13930	4	0.558	evgtrinTRINITY_DN73898c3_g1_i1	67.49	203	64	2	1	202	113	314	5e-97	291	202	395	100	100
AT5G13930	4	0.558	evgtrinTRINITY_DN64916c1_g2_i1	63.72	215	76	2	1	214	77	290	3e-95	287	214	395	100	100
AT5G13930	4	0.558	evgvelvLoc14818t2	64.32	199	69	2	1	198	51	248	7e-91	275	200	395	99	99
AT5G13930	4	0.558	evgvelvLoc667t4	65.28	193	66	1	3	195	38	229	1e-89	273	225	395	86	86
AT5G13930	4	0.558	evgvelvLoc19499t5	66.67	186	62	0	18	203	12	197	3e-87	266	203	395	92	92
AT5G13930	4	0.558	evgvelvLoc3488d92519t1	64.36	188	66	1	2	189	51	237	7e-85	259	189	395	99	99
AT5G13930	4	0.558	evgvelvLoc99131d558289t1	64.97	177	61	1	2	177	218	394	9e-81	249	182	395	97	97
AT5G13930	4	0.558	evgvelvLoc92506d551618t1	64.97	177	61	1	2	177	218	394	8e-80	246	182	395	97	97
AT5G13930	4	0.558	evgtrinTRINITY_DN61208c1_g2_i1	62.71	177	65	1	2	177	218	394	9e-78	241	182	395	97	97
AT5G13930	4	0.558	evgvelvLoc22961d276137t1	60.45	177	69	1	1	176	218	394	1e-77	240	181	395	97	97
AT5G13930	4	0.558	evgvelvLoc68568d320652t1	60.45	177	69	1	1	176	218	394	1e-76	238	181	395	97	97
AT5G13930	4	0.558	evgtrinTRINITY_DN73898c3_g5_i1	64.33	171	60	1	3	172	203	373	2e-75	234	172	395	99	99
AT5G13930	4	0.558	evgvelvLoc3488t2	63.58	173	62	1	2	174	51	222	1e-74	233	174	395	99	99
AT5G13930	4	0.558	evgtrinTRINITY_DN75709c1_g5_i2	61.14	175	66	2	1	174	120	293	9e-74	231	181	395	96	96
AT5G13930	4	0.558	evgvelvLoc88654d339582t1	65.45	165	53	2	1	162	107	270	3e-73	228	162	395	100	100
AT5G13930	4	0.558	evgvelvLoc49382d302090t1	64.46	166	58	1	1	166	56	220	6e-73	228	166	395	100	100
AT5G13930	4	0.558	evgtrinTRINITY_DN63926c0_g7_i3	65.61	157	54	0	7	163	12	168	2e-71	224	163	395	96	96
AT5G13930	4	0.558	evgvelvLoc78408d330002t1	71.22	139	40	0	1	139	54	192	7e-71	221	139	395	100	100
AT5G13930	4	0.558	evgtrinTRINITY_DN73898c3_g13_i1	71.53	144	39	2	1	143	106	248	2e-68	216	145	395	99	99
AT5G13930	4	0.558	evgvelvLoc14139t3	65.36	153	52	1	1	153	81	232	2e-67	213	153	395	100	100
AT5G13930	4	0.558	evgtrinTRINITY_DN64916c1_g4_i1	66.9	142	47	0	3	144	8	149	1e-66	211	144	395	99	99
AT5G13930	4	0.558	evgtrinTRINITY_DN66507c0_g3_i4	64.29	154	53	2	1	153	125	277	1e-66	211	153	395	100	100
AT5G13930	4	0.558	evgtrinTRINITY_DN66507c0_g3_i5	63.64	154	54	2	1	153	125	277	4e-66	210	153	395	100	100
AT5G13930	4	0.558	evgtrinTRINITY_DN73898c3_g7_i2	70.29	138	39	2	1	137	121	257	2e-65	207	138	395	99	99
AT5G13930	4	0.558	evgtrinTRINITY_DN73898c3_g7_i1	70.29	138	39	2	1	137	121	257	3e-65	207	138	395	99	99
AT5G13930	4	0.558	evgtrinTRINITY_DN66507c0_g3_i2	62.84	148	53	2	1	147	125	271	4e-63	202	147	395	100	100
AT5G13930	4	0.558	evgtrinTRINITY_DN60432c0_g4_i1	62.84	148	53	2	1	147	163	309	9e-63	201	147	395	100	100
AT5G13930	4	0.558	evgvelvLoc14139t4	64.54	141	49	1	1	141	81	220	7e-61	196	141	395	100	100
AT5G13930	4	0.558	evgtrinTRINITY_DN67908c0_g3_i7	65.93	135	46	0	2	136	260	394	7e-60	193	141	395	96	96
AT5G13930	4	0.558	evgtrinTRINITY_DN73898c3_g3_i1	72	125	34	1	1	125	103	226	8e-60	192	125	395	100	100
AT5G13930	4	0.558	evgtrinTRINITY_DN67908c0_g3_i4	64.44	135	48	0	2	136	260	394	1e-59	192	141	395	96	96
AT5G13930	4	0.558	evgtrinTRINITY_DN67908c0_g3_i2	64.44	135	48	0	2	136	260	394	3e-59	191	141	395	96	96
AT5G13930	4	0.558	evgtrinTRINITY_DN67908c0_g1_i1	64.44	135	48	0	2	136	260	394	1e-58	189	141	395	96	96
AT5G13930	4	0.558	evgtrinTRINITY_DN75709c1_g5_i5	62.6	131	47	2	1	130	120	249	8e-57	184	130	395	100	100
AT5G13930	4	0.558	evgvelvLoc19499t2	63.91	133	48	0	18	150	12	144	2e-55	182	150	395	89	89
AT5G13930	4	0.558	evgvelvLoc37351t4	69.42	121	37	0	2	122	273	393	3e-54	177	125	395	97	97
AT5G13930	4	0.558	evgtrinTRINITY_DN65512c0_g3_i1	67.77	121	39	0	35	155	8	128	4e-54	179	155	395	78	78
AT5G13930	4	0.558	evgvelvLoc40726d120857t1	68.7	115	35	1	1	115	122	235	2e-53	175	115	395	100	100
AT5G13930	4	0.558	evgvelvLoc47154d504850t1	66.67	120	40	0	1	120	275	394	2e-53	175	125	395	96	96
AT5G13930	4	0.558	evgtrinTRINITY_DN67908c0_g3_i1	64.52	124	44	0	2	125	260	383	4e-53	174	125	395	99	99
AT5G13930	4	0.558	evgtrinTRINITY_DN65512c0_g2_i2	65.29	121	42	0	52	172	8	128	1e-51	172	172	395	70	70
AT5G13930	4	0.558	evgtrinTRINITY_DN73898c3_g9_i2	66.67	123	39	2	2	123	136	257	1e-51	171	124	395	98	98
AT5G13930	4	0.558	evgtrinTRINITY_DN67908c0_g1_i2	67.54	114	37	0	3	116	281	394	2e-51	170	121	395	94	94
AT5G13930	4	0.558	evgtrinTRINITY_DN70877c1_g2_i1	70	110	33	0	1	110	284	393	2e-51	170	113	395	97	97
AT5G13930	4	0.558	evgtrinTRINITY_DN59817c0_g1_i1	62.6	131	47	2	1	130	173	302	4e-51	169	130	395	100	100
AT5G13930	4	0.558	evgvelvLoc21552t4	65.83	120	41	0	1	120	36	155	5e-51	169	121	395	99	99
AT5G13930	4	0.558	evgvelvLoc12729d100205t1	63.93	122	44	0	3	124	8	129	6e-51	169	124	395	98	98
AT5G13930	4	0.558	evgvelvLoc21568d477451t1	66.67	114	38	0	4	117	281	394	8e-51	169	122	395	93	93
AT5G13930	4	0.558	evgtrinTRINITY_DN75709c2_g2_i4	63.71	124	45	0	4	127	38	161	1e-50	168	127	395	98	98
AT5G13930	4	0.558	evgtrinTRINITY_DN67908c0_g3_i5	68.87	106	33	0	1	106	289	394	5e-50	166	111	395	95	95
AT5G13930	4	0.558	evgvelvLoc26916t5	73.53	102	27	0	1	102	292	393	1e-49	165	106	395	96	96
AT5G13930	4	0.558	evgvelvLoc19499t6	63.93	122	44	0	18	139	12	133	6e-49	164	145	395	84	84
AT5G13930	4	0.558	evgtrinTRINITY_DN61208c1_g3_i1	63.87	119	42	1	2	120	260	377	4e-48	161	120	395	99	99
AT5G13930	4	0.558	evgtrinTRINITY_DN64916c1_g1_i2	64.91	114	40	0	3	116	8	121	4e-48	161	116	395	98	98
AT5G13930	4	0.558	evgtrinTRINITY_DN75709c1_g4_i1	66.06	109	36	1	1	109	129	236	1e-47	159	109	395	100	100
AT5G13930	4	0.558	evgtrinTRINITY_DN67908c0_g6_i3	69.39	98	30	0	1	98	297	394	1e-46	157	103	395	95	95
AT5G13930	4	0.558	evgtrinTRINITY_DN64916c1_g1_i3	63.16	114	42	0	3	116	8	121	8e-46	155	116	395	98	98
AT5G13930	4	0.558	evgtrinTRINITY_DN66507c0_g9_i1	62.04	108	39	2	1	107	163	269	1e-42	146	107	395	100	100
AT5G13930	4	0.558	evgvelvLoc20159d475915t1	67.65	102	33	0	1	102	59	160	1e-42	146	102	395	100	100
AT5G13930	4	0.558	evgvelvLoc14600t2	61.26	111	43	0	3	113	8	118	7e-42	144	113	395	98	98
AT5G13930	4	0.558	evgtrinTRINITY_DN73898c3_g5_i3	64.08	103	36	1	1	102	217	319	1e-41	143	102	395	100	100
AT5G13930	4	0.558	evgvelvLoc22720t6	66.67	93	31	0	2	94	300	392	4e-41	143	122	395	76	76
AT5G13930	4	0.558	evgtrinTRINITY_DN75709c1_g5_i7	61.54	104	38	2	1	103	146	248	6e-41	141	104	395	99	99
AT5G13930	4	0.558	evgtrinTRINITY_DN60432c0_g5_i1	59.81	107	42	1	1	106	207	313	1e-39	138	106	395	100	100
AT5G13930	4	0.558	evgtrinTRINITY_DN63926c0_g4_i2	58.04	112	47	0	3	114	8	119	4e-38	134	115	395	97	97
AT5G13930	4	0.558	evgvelvLoc28693d485132t1	58.25	103	42	1	2	103	218	320	7e-38	133	104	395	98	98
AT5G13930	4	0.558	evgvelvLoc326225t1	54.24	118	33	2	1	118	126	222	2e-36	130	118	395	100	100
AT5G13930	4	0.558	evgvelvLoc913t8	59.05	105	41	2	1	104	163	266	2e-36	129	104	395	100	100
AT5G13930	4	0.558	evgvelvLoc9205d262317t1	58	100	42	0	1	100	239	338	1e-35	127	100	395	100	100
AT5G13930	4	0.558	evgtrinTRINITY_DN63926c0_g4_i3	56.73	104	45	0	23	126	8	111	3e-35	127	127	395	82	82
AT5G13930	4	0.558	evgvelvLoc86251d545287t1	56.44	101	43	1	3	102	203	303	7e-33	119	102	395	98	98
AT5G13930	4	0.558	evgtrinTRINITY_DN65512c0_g2_i3	64.1	78	28	0	52	129	8	85	4e-31	116	129	395	60	60
AT5G13930	4	0.558	evgvelvLoc127531d374478t1	54	100	45	1	3	101	203	302	5e-31	114	101	395	98	98
AT4G21620	4	0.558	evgtrinTRINITY_DN65703c1_g1_i6	63.87	119	39	2	49	167	17	131	9e-20	82.4	167	131	71	71
AT4G21620	4	0.558	evgtrinTRINITY_DN65703c1_g1_i5	64.1	117	38	2	47	163	19	131	2e-19	81.6	163	131	72	72
AT4G21620	4	0.558	evgtrinTRINITY_DN65703c1_g1_i1	78.95	57	12	0	123	179	42	98	1e-17	76.3	179	98	32	32
AT5G13930	4	0.558	evgvelvLoc188683t1	69.77	43	13	0	1	43	352	394	6e-16	70.9	48	395	90	90
AT5G13930	4	0.558	evgvelvLoc140242d385178t1	62.5	40	15	0	3	42	38	77	2e-13	63.9	45	395	89	89
AT4G14930	3	0.557	evgtrinTRINITY_DN69757c0_g2_i3	60.65	310	109	5	8	312	13	314	5e-129	375	314	315	97	97
AT4G14930	3	0.557	evgtrinTRINITY_DN69757c0_g3_i5	61.28	297	109	4	8	300	13	307	5e-128	372	301	315	97	97
AT4G14930	3	0.557	evgvelvLoc54262d306833t1	72.8	125	33	1	8	132	13	136	9e-58	185	132	310	95	95
AT3G51290	2	0.557	evgtrinTRINITY_DN63269c0_g1_i1	60.22	460	161	8	1	450	193	640	0	549	450	640	100	100
AT5G44620	2	0.557	evgvelvLoc199430t1	54.45	191	84	1	1	191	327	514	3e-74	236	191	519	100	100
AT5G44620	2	0.557	evgvelvLoc111849d571053t1	38.05	113	65	2	1	113	200	307	1e-13	68.9	167	519	68	68
AT3G63130	1	0.557	evgtrinTRINITY_DN71830c0_g1_i2	66.8	503	158	4	2	504	6	499	0	676	539	535	93	93
AT3G63130	1	0.557	evgtrinTRINITY_DN71830c0_g2_i1	66.27	501	161	3	2	501	6	499	0	673	536	535	93	93
AT1G78650	1	0.557	evgtrinTRINITY_DN68087c0_g1_i5	41.24	582	244	11	1	557	1	509	2e-116	358	557	509	100	100
AT3G63130	1	0.557	evgvelvLoc41118d293992t1	61.54	156	57	2	1	156	332	484	8e-54	181	156	535	100	100
AT4G24000	4	0.556	evgtrinTRINITY_DN63413c0_g1_i3	36.68	638	349	11	1	616	116	720	3e-141	432	616	722	100	100
AT4G24000	4	0.556	evgvelvLoc1227d454747t2	62.28	281	103	1	14	294	60	337	5e-130	387	362	530	78	78
AT4G24000	4	0.556	evgvelvLoc80126t2	49.62	266	119	2	10	266	87	346	7e-92	285	266	530	97	97
AT4G24000	4	0.556	evgtrinTRINITY_DN56098c0_g1_i2	50.6	166	79	2	2	167	164	326	4e-53	179	167	530	99	99
AT5G10020	3	0.556	evgtrinTRINITY_DN74359c0_g5_i2	56.36	692	282	9	2	683	319	1000	0	724	683	1000	100	99
AT5G10020	3	0.556	evgtrinTRINITY_DN59739c0_g1_i1	58.66	479	184	7	1	475	314	782	5e-165	496	475	1000	100	100
AT5G10020	3	0.556	evgtrinTRINITY_DN74359c0_g2_i1	59.73	370	146	2	20	387	23	391	1e-135	417	387	1048	95	95
AT5G10020	3	0.556	evgtrinTRINITY_DN74359c0_g6_i3	71.49	249	71	0	1	249	799	1047	1e-134	409	250	1048	99	99
AT5G10020	3	0.556	evgtrinTRINITY_DN59325c1_g2_i1	54.84	186	84	0	1	186	200	385	4e-55	190	186	1048	100	100
AT3G22910	3	0.556	evgvelvLoc139524d384599t1	51.16	43	21	0	57	99	207	249	2e-07	48.9	102	1017	42	42
AT2G22420	1	0.556	evgtrinTRINITY_DN71937c1_g1_i3	71.26	334	91	2	9	342	1	329	4e-177	499	342	329	98	98
AT2G22420	1	0.556	evgtrinTRINITY_DN64954c0_g3_i19	70.25	326	95	1	30	355	4	327	6e-168	476	357	329	91	91
AT2G22420	1	0.556	evgtrinTRINITY_DN64954c0_g3_i17	73.71	213	56	0	1	213	86	298	9e-114	332	213	329	100	100
AT2G22420	1	0.556	evgvelvLoc64072d522534t1	72.22	162	45	0	2	163	166	327	4e-81	247	168	329	96	96
AT2G22420	1	0.556	evgvelvLoc94028d553154t1	71.6	162	46	0	2	163	166	327	2e-79	243	168	329	96	96
AT2G22420	1	0.556	evgvelvLoc15053d268302t1	64.15	159	49	2	11	169	7	157	3e-63	202	205	329	78	78
AT2G22420	1	0.556	evgvelvLoc15053t2	62.13	169	52	2	1	169	1	157	3e-63	202	205	329	82	82
AT1G21810	1	0.556	evgtrinTRINITY_DN74588c0_g3_i4	34.1	563	230	22	10	483	117	627	7e-56	199	498	629	95	95
AT2G22420	1	0.556	evgvelvLoc179917t1	74.19	93	23	1	3	95	228	319	2e-42	145	110	329	85	85
AT2G22420	1	0.556	evgvelvLoc36029t2	47.67	86	28	2	1	86	104	172	1e-15	72.4	124	329	69	69
AT4G15140	1	0.556	evgvelvLoc110866d570070t1	50.77	65	31	1	8	71	24	88	4e-12	61.2	146	165	60	44
AT1G21810	1	0.556	evgvelvLoc142243d601273t1	42.86	77	39	1	14	85	258	334	4e-07	48.1	109	506	66	66
AT4G15140	1	0.556	evgtrinTRINITY_DN48979c0_g1_i1	69.57	23	7	0	42	64	43	65	3e-05	41.2	119	165	19	19
AT1G16780	2	0.555	evgtrinTRINITY_DN71322c0_g2_i3	87.02	801	103	1	1	800	2	802	0	1422	800	802	100	100
AT3G15540	2	0.555	evgtrinTRINITY_DN58915c1_g1_i2	59.18	196	64	5	1	186	1	190	3e-69	213	204	197	91	91
AT3G15540	2	0.555	evgtrinTRINITY_DN62237c1_g1_i1	52.45	204	63	7	3	180	1	196	3e-57	182	193	197	92	92
AT5G17010	3	0.554	evgtrinTRINITY_DN69254c0_g6_i1	71.97	503	139	1	1	501	1	503	0	722	501	503	100	100
AT5G52280	2	0.553	evgtrinTRINITY_DN73831c0_g3_i1	50.72	138	66	1	1	136	34	171	2e-42	153	181	853	75	75
AT2G47270	2	0.553	evgtrinTRINITY_DN53706c0_g1_i1	50.82	61	28	1	77	137	39	97	2e-14	66.6	143	102	43	43
AT1G59540	1	0.553	evgtrinTRINITY_DN72805c1_g1_i7	56.33	845	330	11	1	833	1	818	0	874	848	823	98	98
AT5G38690	1	0.553	evgtrinTRINITY_DN73412c0_g2_i2	48.09	314	156	4	418	729	249	557	4e-85	285	781	572	64	40
AT1G20120	3	0.552	evgvelvLoc76015d146755t1	62.11	95	36	0	1	95	82	176	2e-35	128	129	402	74	74
AT2G29550	2	0.552	evgtrinTRINITY_DN67168c0_g1_i11	95.81	310	11	1	20	329	132	439	0	625	335	449	93	93
AT2G29550	2	0.552	evgtrinTRINITY_DN67168c0_g1_i8	95.9	390	16	0	1	390	42	431	0	765	406	449	96	96
AT3G11430	2	0.552	evgtrinTRINITY_DN57648c0_g1_i2	87.44	199	25	0	1	199	304	502	1e-124	365	202	502	99	99
AT2G29550	2	0.552	evgtrinTRINITY_DN67168c0_g6_i2	95.68	139	6	0	1	139	293	431	4e-96	289	153	449	91	91
AT3G11430	2	0.552	evgtrinTRINITY_DN57648c0_g2_i1	82.8	157	27	0	1	157	342	498	4e-92	280	164	502	96	96
AT3G11430	2	0.552	evgvelvLoc103229d43025t1	91.67	120	10	0	1	120	304	423	2e-73	230	120	502	100	100
AT2G29550	2	0.552	evgvelvLoc5944t3	73.64	110	5	2	1	109	293	379	2e-46	158	139	449	78	78
AT3G11430	2	0.552	evgvelvLoc146959t2	55.91	127	51	4	1	122	148	274	3e-36	130	122	502	100	100
AT4G02060	1	0.552	evgtrinTRINITY_DN68588c0_g1_i4	82.26	716	127	0	1	716	1	716	0	1251	718	716	99	99
AT4G33400	1	0.552	evgtrinTRINITY_DN69017c0_g1_i2	66.89	595	172	8	49	628	61	645	0	808	628	645	92	92
AT5G35910	1	0.552	evgtrinTRINITY_DN74781c0_g3_i1	49.08	813	320	14	2	805	142	869	0	735	805	870	99	99
AT5G35910	1	0.552	evgtrinTRINITY_DN74781c0_g3_i4	49.63	814	312	15	2	803	142	869	0	738	803	870	99	99
AT3G18210	2	0.551	evgtrinTRINITY_DN68268c0_g3_i7	63.83	376	131	2	10	380	19	394	0	534	380	394	98	98
AT5G67200	2	0.551	evgtrinTRINITY_DN72153c1_g1_i2	56.14	643	245	12	37	647	29	666	0	691	662	669	92	92
AT5G67200	2	0.551	evgvelvLoc51116d509026t1	69.75	238	61	4	3	230	365	601	2e-111	338	231	669	99	99
AT5G67200	2	0.551	evgtrinTRINITY_DN57479c0_g1_i1	65.41	185	64	0	35	219	29	213	6e-70	229	219	669	84	84
AT5G67200	2	0.551	evgvelvLoc42565t1	47.66	107	44	4	2	108	344	438	5e-19	83.2	108	669	99	99
AT1G20330	1	0.55	evgtrinTRINITY_DN66813c0_g1_i2	82.82	355	61	0	70	424	1	355	0	638	424	361	84	84
AT4G36180	1	0.55	evgtrinTRINITY_DN73785c0_g1_i1	64.5	1138	391	7	10	1142	7	1136	0	1396	1142	1136	99	99
AT2G02540	1	0.55	evgtrinTRINITY_DN66175c0_g1_i1	53.22	233	67	7	63	282	81	284	2e-71	226	288	310	76	76
AT4G26590	2	0.549	evgvelvLoc60952d313319t1	60.08	471	184	2	1	467	282	752	0	609	469	753	99	99
AT4G26590	2	0.549	evgtrinTRINITY_DN75385c0_g3_i8	61.23	325	126	0	3	327	20	344	7e-142	423	328	753	99	99
AT4G26590	2	0.549	evgtrinTRINITY_DN75385c0_g1_i1	62.23	233	88	0	1	233	520	752	2e-107	330	235	753	99	99
AT4G26590	2	0.549	evgvelvLoc12470d467392t1	62.6	131	49	0	1	131	548	678	6e-54	182	131	753	100	100
AT5G67270	1	0.549	evgtrinTRINITY_DN66004c0_g1_i11	62.32	353	88	7	1	332	1	329	4e-149	427	332	329	100	100
AT1G04520	1	0.549	evgtrinTRINITY_DN64003c0_g1_i3	53.57	280	109	3	27	285	25	304	6e-103	309	341	307	76	76
AT1G04520	1	0.549	evgtrinTRINITY_DN64003c0_g2_i2	52.32	302	117	5	13	289	8	307	8e-100	301	353	307	78	78
AT5G01890	1	0.549	evgvelvLoc198634t1	47.73	132	69	0	23	154	384	515	4e-29	114	155	967	90	85
AT3G20180	1	0.549	evgvelvLoc94995d554128t1	42.86	112	62	2	1	111	1	111	2e-20	82.4	120	122	93	93
AT3G20180	1	0.549	evgtrinTRINITY_DN57943c0_g1_i2	41.18	85	49	1	17	101	12	95	3e-12	60.5	102	141	83	83
AT1G69870	6	0.548	evgtrinTRINITY_DN66825c0_g2_i1	53.65	561	249	5	48	602	39	594	0	645	614	620	90	90
AT1G69870	6	0.548	evgtrinTRINITY_DN66825c0_g3_i1	55.46	595	248	7	44	630	34	619	0	679	632	620	93	93
AT1G69870	6	0.548	evgtrinTRINITY_DN66825c0_g3_i2	53.85	299	129	4	44	340	34	325	2e-107	332	360	620	83	83
AT1G69870	6	0.548	evgvelvLoc113722d572927t1	47.33	150	77	1	116	265	44	191	4e-44	159	265	620	57	57
AT1G69870	6	0.548	evgvelvLoc37423t2	49.22	128	63	1	1	128	137	262	3e-39	140	129	620	99	99
AT1G69870	6	0.548	evgvelvLoc154803d396927t1	50.94	53	23	1	8	57	550	602	1e-11	61.2	100	620	50	50
AT3G59530	3	0.548	evgtrinTRINITY_DN65751c0_g1_i3	70.28	397	105	3	12	407	14	398	0	598	407	403	97	97
AT5G54400	2	0.548	evgtrinTRINITY_DN65410c0_g1_i1	69.05	294	85	4	1	290	1	292	6e-142	406	294	292	99	99
AT3G52110	2	0.548	evgtrinTRINITY_DN70013c0_g1_i2	38.57	433	152	16	1	420	1	332	2e-67	221	425	334	99	99
AT5G54400	2	0.548	evgvelvLoc194631d427984t1	64.54	141	49	1	9	148	61	201	8e-59	187	148	292	95	95
AT5G07180	1	0.548	evgtrinTRINITY_DN61180c0_g1_i1	69.67	755	202	4	5	734	11	763	0	1036	734	967	99	99
AT4G21270	1	0.548	evgtrinTRINITY_DN69843c2_g2_i2	67.95	699	223	1	1	698	95	793	0	975	698	793	100	100
AT4G21270	1	0.548	evgtrinTRINITY_DN74889c2_g4_i7	57.49	621	244	6	1	620	1	602	0	697	621	793	99	99
AT5G07180	1	0.548	evgtrinTRINITY_DN75162c1_g2_i2	76.77	762	174	3	11	771	11	770	0	1168	771	967	99	99
AT5G07180	1	0.548	evgvelvLoc17670d473172t1	72.05	365	100	2	1	364	330	693	1e-179	526	364	871	100	100
AT4G21270	1	0.548	evgtrinTRINITY_DN69843c2_g3_i4	84.07	226	36	0	1	226	568	793	2e-133	398	226	793	100	100
AT3G54560	1	0.548	evgtrinTRINITY_DN59152c1_g1_i1	86.76	136	16	1	37	170	1	136	2e-75	226	170	136	79	79
AT4G21270	1	0.548	evgvelvLoc69081d527720t1	75.35	142	33	1	1	140	526	667	5e-68	222	140	793	100	100
AT4G21270	1	0.548	evgtrinTRINITY_DN59978c0_g1_i1	39.1	335	166	2	1	297	95	429	5e-57	197	297	793	100	100
AT4G21270	1	0.548	evgtrinTRINITY_DN59978c0_g1_i3	36.13	274	137	2	2	237	142	415	6e-37	139	237	793	99	99
AT5G07180	1	0.548	evgtrinTRINITY_DN65944c0_g5_i1	44.91	167	92	0	1	167	226	392	2e-35	132	167	871	100	100
AT4G21270	1	0.548	evgvelvLoc16690d269935t1	57.14	49	17	2	1	47	562	608	2e-08	51.2	69	793	68	68
AT3G61610	1	0.547	evgtrinTRINITY_DN69088c0_g3_i15	76.13	310	74	0	1	310	1	310	0	515	310	317	100	100
AT3G53760	1	0.547	evgtrinTRINITY_DN72124c0_g1_i5	73.55	741	185	3	11	746	11	745	0	1122	748	745	98	98
AT1G60890	1	0.547	evgtrinTRINITY_DN73559c1_g1_i6	62.81	777	270	7	6	774	4	769	0	990	774	769	99	99
AT3G61610	1	0.547	evgtrinTRINITY_DN71523c2_g3_i2	76.14	306	73	0	1	306	1	306	1e-179	503	307	317	99	99
AT3G01410	1	0.547	evgtrinTRINITY_DN71373c1_g1_i1	52.59	270	117	3	151	411	2	269	7e-93	286	437	294	60	60
AT3G01410	1	0.547	evgtrinTRINITY_DN68769c0_g2_i5	52.38	252	105	4	1	241	42	289	1e-81	250	250	294	96	96
AT5G55820	1	0.547	evgtrinTRINITY_DN75174c0_g1_i3	35.26	604	303	15	763	1309	1197	1769	5e-64	240	1309	1769	42	42
AT3G01410	1	0.547	evgtrinTRINITY_DN70918c0_g2_i8	61.15	139	54	0	360	498	154	292	6e-53	184	503	294	28	28
AT3G01410	1	0.547	evgtrinTRINITY_DN81092c0_g1_i1	34.69	98	63	1	10	106	183	280	2e-12	64.7	187	294	52	52
AT3G01410	1	0.547	evgtrinTRINITY_DN64487c0_g3_i5	30.88	136	91	2	90	223	146	280	2e-09	58.5	352	294	38	38
AT3G01410	1	0.547	evgtrinTRINITY_DN56443c0_g2_i1	31.85	135	88	3	21	152	147	280	1e-08	54.3	221	294	60	60
AT3G01410	1	0.547	evgvelvLoc39931d120283t1	27.19	114	82	1	112	224	164	277	8e-05	44.3	314	294	36	36
AT1G78680	3	0.546	evgtrinTRINITY_DN66154c0_g1_i3	49.12	340	150	8	49	371	8	341	4e-93	287	388	347	83	83
AT5G02530	2	0.546	evgtrinTRINITY_DN67333c0_g2_i1	62.02	208	62	7	1	191	1	208	1e-63	202	215	290	89	89
AT3G06030	1	0.546	evgtrinTRINITY_DN72372c1_g1_i12	57.8	590	218	11	1	588	84	644	0	607	610	651	96	96
AT3G06030	1	0.546	evgtrinTRINITY_DN72372c1_g1_i1	40.58	276	151	6	1	275	325	588	5e-48	171	282	651	98	98
AT3G61550	4	0.545	evgtrinTRINITY_DN62507c0_g1_i2	58.95	190	63	4	30	205	21	209	5e-68	211	205	212	86	86
AT3G61550	4	0.545	evgtrinTRINITY_DN57351c0_g1_i2	58.73	189	64	3	26	200	21	209	7e-68	210	200	212	88	88
AT1G60800	1	0.545	evgtrinTRINITY_DN75313c2_g2_i1	67.03	637	194	7	1	626	1	632	0	809	626	632	100	100
AT1G60800	1	0.545	evgtrinTRINITY_DN71029c0_g1_i1	79.81	213	35	1	1	205	353	565	1e-115	344	205	565	100	100
AT1G60800	1	0.545	evgtrinTRINITY_DN57394c0_g1_i5	72.44	254	64	4	1	252	17	266	1e-103	316	252	565	100	100
AT1G60800	1	0.545	evgvelvLoc49560d507391t2	43.59	39	22	0	149	187	217	255	0.0002	42	196	565	20	20
AT5G03870	1	0.544	evgtrinTRINITY_DN61487c0_g1_i1	47.09	412	172	12	1	395	1	383	1e-101	311	396	384	99	99
AT5G03870	1	0.544	evgtrinTRINITY_DN67913c0_g2_i8	45.77	402	183	11	1	386	1	383	1e-98	303	387	384	99	99
AT5G03870	1	0.544	evgtrinTRINITY_DN67913c0_g2_i5	46.13	401	185	10	1	388	1	383	5e-96	296	389	384	99	99
AT1G51510	1	0.544	evgtrinTRINITY_DN75839c0_g2_i7	64.74	190	63	2	1	188	1	188	4e-84	251	199	202	94	94
AT1G51510	1	0.544	evgvelvLoc168332t1	70.71	99	29	0	1	99	90	188	2e-47	154	110	202	90	90
AT1G51510	1	0.544	evgvelvLoc10796d98635t1	73.03	89	24	0	1	89	92	180	5e-43	143	118	202	75	75
AT5G03870	1	0.544	evgvelvLoc15874d269125t1	55.17	87	39	0	6	92	245	331	2e-25	99.4	119	384	73	73
AT3G58650	1	0.544	evgvelvLoc46017d503641t1	31.67	180	96	4	1	177	377	532	3e-11	64.3	292	820	61	61
AT1G51510	1	0.544	evgvelvLoc206559t1	34.65	101	50	5	1	99	2	88	2e-06	45.1	119	202	83	83
AT1G30080	2	0.543	evgtrinTRINITY_DN62018c0_g1_i1	64.72	411	135	4	70	477	5	408	2e-179	513	477	408	86	86
AT1G30080	2	0.543	evgtrinTRINITY_DN58813c0_g1_i1	62.62	404	141	3	2	395	3	406	2e-176	503	398	408	99	99
AT5G19290	2	0.543	evgtrinTRINITY_DN73344c0_g4_i1	66.67	324	98	4	62	383	4	319	7e-163	464	383	330	84	84
AT5G19290	2	0.543	evgtrinTRINITY_DN65849c0_g1_i7	69.21	315	91	2	8	321	3	312	2e-162	461	325	330	97	97
AT2G32530	2	0.543	evgtrinTRINITY_DN69992c0_g2_i13	52.12	378	169	5	8	383	10	377	6e-131	397	383	755	98	98
AT2G32530	2	0.543	evgtrinTRINITY_DN69992c0_g2_i4	52.38	378	168	5	8	383	10	377	6e-131	397	383	755	98	98
AT5G19290	2	0.543	evgtrinTRINITY_DN76072c0_g1_i3	50.77	323	154	4	3	322	4	324	2e-117	347	339	330	94	94
AT5G19290	2	0.543	evgvelvLoc14995d101939t1	32.96	179	60	5	3	181	4	122	3e-22	93.6	205	330	87	87
AT5G19290	2	0.543	evgvelvLoc17151t4	41.67	48	28	0	3	50	4	51	2e-06	45.1	76	330	63	63
AT1G18650	1	0.543	evgvelvLoc22783d478771t1	58.76	97	34	1	1	91	23	119	1e-33	117	126	131	72	72
AT3G14560	5	0.542	evgtrinTRINITY_DN62771c0_g1_i2	31.74	167	75	9	15	162	8	154	3e-06	45.1	163	154	91	91
AT3G55120	3	0.542	evgtrinTRINITY_DN64046c0_g1_i14	64.47	228	77	2	8	235	16	239	4e-98	291	270	246	84	84
AT2G29210	1	0.542	evgtrinTRINITY_DN73911c0_g1_i10	59.92	252	89	4	1	250	1	242	2e-80	281	915	878	27	27
AT2G21300	3	0.541	evgtrinTRINITY_DN73628c0_g1_i2	59.7	593	182	7	1	583	1	546	0	667	603	862	97	97
AT2G21300	3	0.541	evgtrinTRINITY_DN73628c0_g2_i1	73.33	300	80	0	1	300	1	300	1e-155	461	300	862	100	100
AT2G21300	3	0.541	evgtrinTRINITY_DN70475c0_g1_i7	47.73	308	137	7	121	422	568	857	9e-75	253	431	862	70	70
AT2G45560	2	0.541	evgtrinTRINITY_DN66341c0_g1_i3	39.01	505	287	6	19	510	8	504	1e-119	365	520	512	95	95
AT1G09150	2	0.541	evgtrinTRINITY_DN64347c0_g1_i2	85.64	181	26	0	1	181	1	181	2e-114	327	181	181	100	100
AT3G29280	2	0.541	evgtrinTRINITY_DN69488c2_g1_i2	76.55	145	34	0	14	158	24	168	1e-82	246	170	178	85	85
AT2G45560	2	0.541	evgtrinTRINITY_DN73474c0_g1_i1	27.78	126	89	1	295	418	115	240	3e-07	52	444	241	28	28
AT3G19960	1	0.541	evgtrinTRINITY_DN75847c1_g6_i3	84.15	328	52	0	1	328	270	597	0	586	328	894	100	100
AT3G19960	1	0.541	evgtrinTRINITY_DN57962c0_g1_i1	84.59	292	45	0	1	292	270	561	2e-180	525	292	894	100	100
AT3G19960	1	0.541	evgtrinTRINITY_DN59105c0_g1_i1	69.53	361	96	5	1	355	814	1166	8e-159	479	356	1166	99	99
AT3G19960	1	0.541	evgtrinTRINITY_DN75847c1_g4_i3	64.46	363	117	4	1	361	814	1166	5e-147	449	362	1166	99	99
AT3G19960	1	0.541	evgtrinTRINITY_DN75847c1_g6_i2	83.98	231	37	0	1	231	600	830	1e-141	422	231	894	100	100
AT3G19960	1	0.541	evgvelvLoc61025d519368t1	66.96	336	94	6	27	353	4	331	1e-140	425	353	894	93	93
AT3G19960	1	0.541	evgtrinTRINITY_DN67056c0_g1_i1	63.14	293	92	4	27	311	4	288	6e-112	348	311	894	92	92
AT3G19960	1	0.541	evgtrinTRINITY_DN67056c0_g1_i2	62.8	293	93	4	27	311	4	288	1e-110	345	311	894	92	92
AT3G19960	1	0.541	evgtrinTRINITY_DN75847c0_g1_i1	86.19	181	25	0	1	181	634	814	6e-109	335	181	894	100	100
AT3G19960	1	0.541	evgvelvLoc75923t3	79.14	139	29	0	4	142	156	294	2e-71	234	142	1166	98	98
AT2G44770	6	0.54	evgtrinTRINITY_DN43643c0_g1_i1	67.92	106	34	0	2	107	29	134	1e-48	159	107	266	99	99
AT1G65060	3	0.54	evgtrinTRINITY_DN64554c0_g1_i2	71.96	460	119	3	1	457	104	556	0	685	457	561	100	100
AT1G65060	3	0.54	evgtrinTRINITY_DN71779c1_g4_i9	69.19	529	152	4	3	528	5	525	0	746	528	561	99	99
AT5G67360	2	0.54	evgtrinTRINITY_DN65487c0_g1_i1	60.9	532	189	8	2	527	238	756	0	637	528	757	99	99
AT5G67360	2	0.54	evgtrinTRINITY_DN75456c1_g1_i2	71.13	530	139	3	1	529	241	757	0	777	529	757	100	100
AT5G67360	2	0.54	evgvelvLoc32555d285587t1	58.96	402	145	6	2	398	238	624	2e-151	451	399	757	99	99
AT5G67360	2	0.54	evgvelvLoc71163d529869t1	57.8	218	82	2	5	221	11	219	6e-86	273	221	757	98	98
AT5G67360	2	0.54	evgvelvLoc63463d27962t1	56.85	197	80	2	3	198	11	203	5e-74	244	281	757	70	70
AT5G67360	2	0.54	evgvelvLoc11311d264453t1	56.4	172	62	2	4	175	559	717	1e-58	197	175	757	98	98
AT5G67360	2	0.54	evgvelvLoc265t8	40	170	62	5	13	181	12	142	3e-28	112	181	757	93	93
AT1G69770	1	0.54	evgtrinTRINITY_DN71413c0_g2_i2	55.22	833	321	12	50	842	7	827	0	868	860	839	92	92
AT1G44970	3	0.539	evgtrinTRINITY_DN66010c0_g1_i2	69.44	337	98	1	10	341	10	346	2e-173	490	341	346	97	97
AT1G44970	3	0.539	evgtrinTRINITY_DN66010c0_g1_i3	68.06	335	102	1	1	330	1	335	6e-165	468	330	346	100	100
AT5G42100	3	0.539	evgvelvLoc48522t2	62.11	256	97	0	19	274	18	273	8e-111	332	306	423	84	84
AT1G66540	2	0.539	evgvelvLoc155611d59702t1	62.66	158	52	3	1	158	137	287	4e-62	197	159	327	99	99
AT1G66540	2	0.539	evgvelvLoc238023t1	58.67	75	31	0	1	75	210	284	2e-26	100	75	386	100	100
AT5G53770	1	0.539	evgtrinTRINITY_DN69390c0_g2_i4	60.17	482	156	7	2	464	9	473	0	551	541	530	86	86
AT3G17360	1	0.539	evgtrinTRINITY_DN75559c0_g2_i3	62.79	637	221	5	2	636	166	788	0	792	1550	2074	99	41
AT5G53770	1	0.539	evgvelvLoc17829d271060t1	56.94	216	83	4	1	209	14	226	3e-69	224	209	530	100	100
AT3G17360	1	0.539	evgvelvLoc53468d306057t1	36.44	118	64	3	11	120	1	115	6e-08	51.6	133	2075	83	83
AT4G35550	2	0.538	evgtrinTRINITY_DN67631c0_g1_i2	51.8	222	58	4	42	244	75	266	2e-60	195	245	268	83	83
AT4G35550	2	0.538	evgtrinTRINITY_DN67631c0_g1_i11	53.12	224	56	5	42	246	75	268	2e-57	187	246	268	83	83
AT3G42170	1	0.538	evgtrinTRINITY_DN72249c0_g1_i4	54.87	647	264	9	22	663	51	674	0	726	679	696	95	95
AT3G42170	1	0.538	evgtrinTRINITY_DN72249c0_g2_i1	56.51	653	253	8	7	655	27	652	0	749	671	674	97	97
AT3G42170	1	0.538	evgtrinTRINITY_DN71162c0_g1_i1	34.84	663	390	9	13	660	17	652	3e-135	417	683	674	95	95
AT3G42170	1	0.538	evgtrinTRINITY_DN74152c1_g1_i1	29.62	655	404	12	54	685	32	652	2e-95	313	696	674	91	91
AT4G02290	1	0.538	evgtrinTRINITY_DN74222c1_g1_i4	84	150	24	0	42	191	48	197	6e-91	279	202	516	74	74
AT3G42170	1	0.538	evgtrinTRINITY_DN70968c1_g1_i4	31.15	520	342	8	69	583	145	653	2e-76	260	613	674	84	84
AT3G42170	1	0.538	evgtrinTRINITY_DN75676c0_g1_i2	31.35	437	288	4	3	438	251	676	1e-72	246	480	696	91	91
AT4G02290	1	0.538	evgvelvLoc112422t1	59.65	171	69	0	1	171	108	278	7e-71	223	172	404	99	99
AT3G42170	1	0.538	evgtrinTRINITY_DN76117c1_g6_i3	31.74	293	177	5	1	293	383	652	1e-44	162	296	674	99	99
AT3G42170	1	0.538	evgtrinTRINITY_DN76117c1_g5_i3	34.16	281	172	5	10	279	82	360	3e-44	160	282	674	96	96
AT3G42170	1	0.538	evgtrinTRINITY_DN65400c1_g1_i3	32.37	278	178	4	1	276	383	652	1e-41	154	321	674	86	86
AT3G42170	1	0.538	evgvelvLoc9788t2	27.97	311	223	1	33	343	114	423	4e-41	153	343	674	91	91
AT4G02290	1	0.538	evgvelvLoc113997t1	64.52	93	33	0	1	93	306	398	3e-39	137	101	404	92	92
AT3G42170	1	0.538	evgtrinTRINITY_DN51599c0_g1_i1	29.22	219	154	1	4	222	253	470	6e-32	124	222	674	99	99
AT3G42170	1	0.538	evgtrinTRINITY_DN76117c1_g5_i2	34.18	196	113	5	7	189	48	240	1e-27	110	189	674	97	97
AT4G02290	1	0.538	evgvelvLoc33397d115567t1	87.76	49	6	0	37	85	73	121	7e-24	96.7	112	516	44	44
AT3G42170	1	0.538	evgtrinTRINITY_DN76117c1_g6_i7	50	84	42	0	11	94	591	674	2e-23	95.9	108	696	78	78
AT3G42170	1	0.538	evgvelvLoc112502d172015t1	28.81	177	125	1	30	205	334	510	2e-22	96.7	217	674	81	81
AT3G42170	1	0.538	evgvelvLoc79529t1	32.54	126	84	1	2	127	263	387	1e-17	79.7	131	674	96	96
AT3G42170	1	0.538	evgvelvLoc187734d422789t1	26.19	168	117	3	2	169	433	593	2e-15	74.7	173	696	97	97
AT3G42170	1	0.538	evgtrinTRINITY_DN76117c1_g6_i4	29.23	130	84	2	1	130	405	526	8e-15	72.4	150	696	87	87
AT3G42170	1	0.538	evgtrinTRINITY_DN76117c1_g6_i6	30	130	83	2	1	130	383	504	4e-14	70.5	150	674	87	87
AT3G42170	1	0.538	evgvelvLoc124220d371624t1	26.77	127	89	2	2	128	433	555	4e-13	67	129	696	98	98
AT3G42170	1	0.538	evgtrinTRINITY_DN76117c1_g6_i1	55.77	52	23	0	47	98	589	640	6e-13	65.5	100	696	52	52
AT3G42170	1	0.538	evgtrinTRINITY_DN75676c0_g1_i8	24.6	248	148	8	9	232	3	235	3e-11	63.2	232	674	97	97
AT3G42170	1	0.538	evgvelvLoc54480d512559t1	28.12	128	88	2	2	129	419	542	3e-11	61.2	131	674	98	98
AT3G42170	1	0.538	evgvelvLoc40257d293144t1	30.61	98	67	1	3	100	229	325	1e-10	59.3	126	674	78	78
AT3G42170	1	0.538	evgtrinTRINITY_DN48942c0_g2_i3	33.02	106	60	2	3	108	541	635	3e-10	57.8	108	696	98	98
AT3G42170	1	0.538	evgtrinTRINITY_DN48942c0_g2_i2	32.04	103	62	1	14	116	541	635	5e-10	57.4	116	696	89	89
AT3G42170	1	0.538	evgvelvLoc95362t2	31.25	96	63	1	8	103	547	639	5e-10	56.6	104	674	92	92
AT3G42170	1	0.538	evgtrinTRINITY_DN51599c0_g1_i2	27.27	121	87	1	4	124	253	372	6e-10	57.4	126	674	96	96
AT3G42170	1	0.538	evgtrinTRINITY_DN75676c0_g1_i4	34.33	67	41	1	7	73	494	557	2e-08	51.2	77	696	87	87
AT5G05270	3	0.537	evgtrinTRINITY_DN63169c0_g1_i2	70.81	209	60	1	1	208	1	209	4e-95	280	209	209	99	99
AT5G05270	3	0.537	evgtrinTRINITY_DN63169c0_g1_i7	70.33	209	61	1	1	208	1	209	8e-94	277	209	209	99	99
AT3G20150	1	0.537	evgtrinTRINITY_DN64177c0_g1_i2	44.94	879	404	17	1	877	309	1109	0	564	908	1114	97	97
AT5G46280	1	0.537	evgtrinTRINITY_DN66778c0_g1_i1	73.31	708	158	7	1	689	1	696	0	1035	695	776	99	99
AT3G20150	1	0.537	evgtrinTRINITY_DN75493c0_g1_i4	47.61	1174	513	29	10	1148	3	1109	0	875	1178	1114	97	97
AT3G20150	1	0.537	evgtrinTRINITY_DN75493c0_g2_i1	65.16	155	54	0	1	155	185	339	8e-68	224	155	1061	100	100
AT3G20150	1	0.537	evgtrinTRINITY_DN55572c0_g1_i2	37.64	178	89	3	14	176	8	178	3e-23	98.2	176	1061	93	93
AT3G20150	1	0.537	evgtrinTRINITY_DN55572c0_g1_i1	37.22	180	87	4	14	176	8	178	8e-22	94.4	176	1061	93	93
AT3G12710	4	0.536	evgtrinTRINITY_DN76144c2_g2_i1	59.87	309	107	6	168	473	16	310	5e-122	364	495	312	62	62
AT3G61490	5	0.534	evgtrinTRINITY_DN67757c0_g1_i4	68.45	485	147	3	1	482	108	589	0	723	485	589	99	99
AT3G61490	5	0.534	evgvelvLoc98214d348435t1	64.38	146	50	1	1	146	98	241	6e-66	211	146	476	100	100
AT3G61490	5	0.534	evgvelvLoc96096t2	64.36	101	34	1	1	101	107	205	7e-43	148	101	476	100	100
AT3G61490	5	0.534	evgvelvLoc117310d576516t1	57.69	104	42	1	15	118	8	109	4e-34	124	118	476	88	88
AT1G58360	2	0.534	evgtrinTRINITY_DN68342c0_g1_i1	59.61	458	184	1	2	459	24	480	0	599	460	485	99	99
AT5G15720	4	0.533	evgtrinTRINITY_DN63981c0_g1_i2	58.38	370	121	2	30	397	26	364	6e-156	449	397	364	93	93
AT5G15720	4	0.533	evgtrinTRINITY_DN63428c1_g1_i8	44.67	347	181	7	19	357	20	363	5e-90	279	374	364	91	91
AT5G15720	4	0.533	evgtrinTRINITY_DN67534c1_g1_i1	44.25	348	183	7	23	364	20	362	4e-88	275	378	364	90	90
AT5G15720	4	0.533	evgtrinTRINITY_DN63428c1_g1_i5	44.09	347	183	7	19	357	20	363	2e-86	270	373	364	91	91
AT5G15720	4	0.533	evgtrinTRINITY_DN64388c0_g1_i2	42.48	339	186	6	27	358	27	363	2e-86	270	360	364	92	92
AT5G15720	4	0.533	evgvelvLoc91074d550172t1	43.07	339	178	7	29	355	27	362	4e-82	258	358	364	91	91
AT5G15720	4	0.533	evgtrinTRINITY_DN75804c1_g1_i4	42.39	335	182	7	1	328	32	362	3e-78	247	330	364	99	99
AT5G15720	4	0.533	evgtrinTRINITY_DN75804c1_g1_i5	42.09	335	183	7	1	328	32	362	8e-78	246	345	364	95	95
AT5G15720	4	0.533	evgtrinTRINITY_DN75804c1_g1_i11	42.09	335	183	7	1	328	32	362	9e-77	244	345	364	95	95
AT5G15720	4	0.533	evgtrinTRINITY_DN75804c1_g1_i6	42.13	178	96	4	2	174	79	254	5e-34	126	214	313	81	81
AT5G15720	4	0.533	evgvelvLoc19304t4	38.68	106	65	0	25	130	123	228	6e-19	82	143	313	74	74
AT5G15720	4	0.533	evgvelvLoc233061t4	34.75	141	74	4	2	136	190	318	2e-17	78.2	149	333	91	91
AT2G27810	2	0.533	evgtrinTRINITY_DN73285c0_g1_i1	81.73	498	90	1	1	497	193	690	0	790	497	709	100	100
AT2G27810	2	0.533	evgtrinTRINITY_DN73285c0_g1_i5	71.75	722	166	10	1	697	1	709	0	956	697	709	100	100
AT2G27810	2	0.533	evgtrinTRINITY_DN73285c0_g1_i9	71.47	722	168	10	1	697	1	709	0	949	697	709	100	100
AT2G27810	2	0.533	evgtrinTRINITY_DN73285c0_g1_i10	80.3	264	52	0	1	264	299	562	8e-133	392	264	589	100	100
AT2G27810	2	0.533	evgtrinTRINITY_DN62848c4_g1_i1	54.5	200	63	7	21	199	20	212	6e-54	183	199	542	90	90
AT3G53190	1	0.533	evgtrinTRINITY_DN69653c0_g1_i4	73.05	423	106	5	1	418	2	421	0	621	455	483	92	92
AT3G53190	1	0.533	evgtrinTRINITY_DN53920c0_g3_i1	50.42	119	58	1	26	143	2	120	1e-36	132	144	483	82	82
AT5G67100	2	0.532	evgtrinTRINITY_DN75743c0_g1_i3	60.81	1526	523	20	6	1501	44	1524	0	1836	1503	1524	99	99
AT5G67100	2	0.532	evgvelvLoc174988d413066t1	30.94	181	92	10	1	173	156	311	1e-06	48.1	173	1524	100	100
AT3G50530	4	0.531	evgtrinTRINITY_DN72415c0_g2_i1	74.07	405	76	6	1	396	1	385	0	597	396	601	100	100
AT3G50530	4	0.531	evgtrinTRINITY_DN72415c0_g4_i2	84.49	245	38	0	1	245	354	598	3e-148	431	249	601	98	98
AT3G50530	4	0.531	evgtrinTRINITY_DN57424c1_g6_i2	82.79	244	42	0	1	244	355	598	1e-145	425	248	601	98	98
AT3G50530	4	0.531	evgtrinTRINITY_DN72415c0_g1_i2	85.48	186	26	1	1	185	109	294	1e-111	335	185	601	100	100
AT3G50530	4	0.531	evgvelvLoc188036t1	81.4	86	11	2	47	127	50	135	3e-38	137	127	632	64	64
AT3G50530	4	0.531	evgvelvLoc188036t2	81.69	71	9	1	47	113	50	120	5e-31	117	113	601	59	59
AT3G50530	4	0.531	evgvelvLoc39073d291991t1	69.33	75	13	3	30	100	36	104	9e-23	93.6	100	632	71	71
AT1G01510	1	0.531	evgtrinTRINITY_DN71748c0_g4_i15	64.55	488	156	7	1	480	158	636	0	590	480	636	100	100
AT1G11600	1	0.531	evgtrinTRINITY_DN74564c1_g1_i2	66.99	515	162	3	1	512	1	510	0	726	512	510	100	100
AT1G01510	1	0.531	evgtrinTRINITY_DN71748c0_g4_i13	60.12	346	126	4	9	347	296	636	3e-126	380	347	636	98	98
AT5G53620	1	0.531	evgtrinTRINITY_DN76129c1_g3_i2	45.19	509	190	16	3	502	197	625	5e-110	346	513	682	97	97
AT5G53620	1	0.531	evgtrinTRINITY_DN66069c0_g2_i1	42.24	509	201	17	3	498	197	625	3e-97	312	511	682	97	97
AT1G01510	1	0.531	evgtrinTRINITY_DN34230c0_g1_i1	86.31	168	22	1	1	168	94	260	9e-96	294	169	636	99	99
AT1G01510	1	0.531	evgtrinTRINITY_DN71748c0_g4_i9	57.09	296	115	4	9	297	296	586	3e-92	290	297	636	97	97
AT5G53620	1	0.531	evgtrinTRINITY_DN76129c1_g2_i1	51.71	205	81	2	3	207	4	190	6e-56	191	207	682	99	99
AT5G53620	1	0.531	evgtrinTRINITY_DN66069c0_g1_i2	50.98	204	82	3	3	205	4	190	4e-54	185	206	682	99	99
AT1G11600	1	0.531	evgvelvLoc53256t2	65.25	118	30	2	10	127	34	140	4e-45	155	127	510	93	93
AT4G39680	2	0.53	evgtrinTRINITY_DN74838c0_g2_i7	44.93	572	249	17	7	550	8	541	2e-124	384	588	633	93	93
AT4G39680	2	0.53	evgtrinTRINITY_DN74838c0_g2_i6	45.2	573	245	16	7	549	8	541	2e-123	384	665	633	82	82
AT4G39680	2	0.53	evgtrinTRINITY_DN61636c0_g2_i1	63.55	107	34	3	55	159	367	470	1e-32	123	159	633	66	66
AT4G39680	2	0.53	evgtrinTRINITY_DN74838c0_g4_i1	70.37	54	16	0	1	54	488	541	5e-20	88.6	180	633	30	30
AT4G39680	2	0.53	evgtrinTRINITY_DN74838c0_g3_i1	72.55	51	14	0	4	54	3	53	2e-19	89.4	295	633	17	17
AT4G39680	2	0.53	evgtrinTRINITY_DN74838c0_g3_i4	72.55	51	14	0	4	54	3	53	4e-19	89.7	379	633	64	13
AT3G02600	1	0.53	evgtrinTRINITY_DN69226c0_g3_i2	60.31	325	112	3	2	323	3	313	5e-135	390	324	314	99	99
AT3G02600	1	0.53	evgtrinTRINITY_DN69226c0_g4_i26	69.7	165	50	0	2	166	112	276	5e-82	251	212	314	78	78
AT3G02600	1	0.53	evgtrinTRINITY_DN69226c0_g4_i13	63.23	155	56	1	1	155	1	154	2e-67	211	155	314	100	100
AT3G02600	1	0.53	evgvelvLoc211063d439912t1	66.67	51	17	0	1	51	215	265	2e-19	81.6	109	314	47	47
AT1G02205	5	0.529	evgtrinTRINITY_DN64606c2_g4_i3	57.73	556	230	2	1	553	1	554	0	664	553	625	100	100
AT1G02205	5	0.529	evgtrinTRINITY_DN71854c0_g5_i6	58.4	625	251	4	1	617	1	624	0	741	619	625	99	99
AT1G02205	5	0.529	evgtrinTRINITY_DN71854c0_g5_i7	59.26	621	247	3	1	616	1	620	0	751	619	625	99	99
AT1G02205	5	0.529	evgvelvLoc96333t1	53.79	383	168	4	2	376	79	460	4e-145	424	378	461	99	99
AT1G02205	5	0.529	evgvelvLoc3904d457781t1	52.56	156	68	4	1	151	231	385	2e-48	164	153	386	99	99
AT1G02205	5	0.529	evgvelvLoc12376t2	39.86	138	43	2	1	138	225	322	1e-25	102	138	461	100	100
AT3G25040	2	0.529	evgtrinTRINITY_DN67765c0_g3_i5	84.19	215	34	0	1	215	1	215	1e-135	384	215	215	100	100
AT3G25040	2	0.529	evgtrinTRINITY_DN63960c0_g2_i2	73.49	215	57	0	1	215	1	215	2e-118	340	215	215	100	100
AT5G50350	2	0.529	evgtrinTRINITY_DN74659c1_g1_i5	35.94	409	195	10	196	583	222	584	9e-52	189	583	584	67	67
AT5G50350	2	0.529	evgtrinTRINITY_DN74659c1_g2_i1	33.62	354	176	7	1	338	274	584	4e-38	144	338	584	100	100
AT5G50350	2	0.529	evgtrinTRINITY_DN74659c1_g1_i4utrorf	40.84	191	99	6	6	192	298	478	2e-26	108	234	584	80	80
AT5G50350	2	0.529	evgtrinTRINITY_DN75401c1_g4_i8	46.32	95	48	2	171	264	340	432	1e-10	62.4	294	584	32	32
AT5G50350	2	0.529	evgtrinTRINITY_DN75401c1_g4_i12	46.32	95	48	2	286	379	340	432	2e-10	63.2	484	584	19	19
AT5G50350	2	0.529	evgtrinTRINITY_DN63409c0_g2_i2	46.97	66	32	2	199	262	238	302	2e-06	49.3	262	584	60	24
AT4G00430	1	0.529	evgtrinTRINITY_DN69351c0_g1_i2	83.28	287	48	0	1	287	1	287	0	504	287	287	100	100
AT5G51660	1	0.529	evgtrinTRINITY_DN75266c0_g1_i3	73.22	1460	367	12	1	1454	1	1442	0	2219	1454	1442	100	100
AT4G00430	1	0.529	evgtrinTRINITY_DN69351c0_g1_i3	81.88	287	52	0	1	287	1	287	6e-177	494	287	287	100	100
AT1G71850	1	0.529	evgtrinTRINITY_DN62987c0_g3_i1	51.09	411	171	5	23	423	17	407	4e-142	424	566	470	71	71
AT4G00430	1	0.529	evgvelvLoc53778d511826t1	83.33	132	22	0	1	132	33	164	4e-76	229	132	219	100	100
AT1G56020	1	0.529	evgtrinTRINITY_DN67681c0_g1_i2	46.15	429	165	21	1	406	1	386	1e-68	226	407	398	99	99
AT1G56020	1	0.529	evgvelvLoc90624t2	50	100	33	4	28	127	1	83	2e-16	75.9	149	398	67	67
AT5G23530	3	0.528	evgtrinTRINITY_DN67936c0_g1_i3	59.94	322	120	4	6	324	13	328	2e-140	405	332	335	96	96
AT5G23530	3	0.528	evgtrinTRINITY_DN67936c0_g3_i3	55.22	335	138	4	1	332	1	326	1e-127	373	341	335	97	97
AT5G23530	3	0.528	evgtrinTRINITY_DN67936c0_g2_i2	54.93	335	137	5	1	330	1	326	9e-125	366	339	335	97	97
AT5G23530	3	0.528	evgtrinTRINITY_DN54598c0_g1_i1	51.16	258	118	3	1	255	1	253	8e-88	268	256	335	99	99
AT5G23530	3	0.528	evgvelvLoc38828d496020t1	57.95	176	71	2	7	182	13	185	4e-72	225	193	335	91	91
AT5G23530	3	0.528	evgvelvLoc50018d507881t1	54.3	186	77	3	1	184	1	180	8e-61	201	337	335	99	55
AT5G23530	3	0.528	evgvelvLoc25552t2	47.2	125	42	1	17	141	87	187	1e-32	122	191	335	65	65
AT1G78770	1	0.528	evgtrinTRINITY_DN74921c1_g2_i4	80	535	104	2	1	534	1	533	0	871	541	543	99	99
AT1G01110	1	0.528	evgtrinTRINITY_DN69278c0_g3_i5	58.45	426	147	11	20	430	117	527	5e-152	446	430	527	96	96
AT1G01110	1	0.528	evgvelvLoc97452t1	77.78	27	5	1	77	102	1	27	4e-05	42.7	144	527	18	18
AT5G64570	4	0.527	evgtrinTRINITY_DN62864c0_g4_i1	75.15	342	84	1	1	342	208	548	0	552	342	610	100	100
AT5G64570	4	0.527	evgtrinTRINITY_DN73719c1_g3_i5	69.45	779	230	3	33	804	7	784	0	1157	804	784	96	96
AT5G64570	4	0.527	evgtrinTRINITY_DN73719c1_g4_i1	72.1	233	64	1	3	234	8	240	2e-117	352	234	610	99	99
AT5G64570	4	0.527	evgtrinTRINITY_DN73719c0_g1_i2	62.5	240	84	1	1	234	387	626	2e-112	339	234	626	100	100
AT5G64570	4	0.527	evgvelvLoc67296d319451t1	60	80	30	1	60	137	473	552	1e-22	94.4	137	610	57	57
AT3G25150	1	0.527	evgtrinTRINITY_DN67470c0_g1_i2	50.6	415	176	13	1	396	4	408	1e-115	353	473	488	84	84
AT3G61250	1	0.527	evgtrinTRINITY_DN71131c0_g1_i6	38.38	198	83	7	1	197	119	278	9e-27	106	216	299	91	91
AT5G07280	2	0.526	evgtrinTRINITY_DN75142c0_g1_i2	45.9	1146	570	12	158	1285	79	1192	0	927	1294	1192	95	87
AT5G07280	2	0.526	evgvelvLoc166194d624949t1	46.09	128	68	1	1	128	220	346	1e-25	103	133	1192	97	96
AT5G07280	2	0.526	evgvelvLoc87037d154641t1	35.96	114	60	4	4	111	161	267	3e-05	42.7	113	1192	96	96
AT4G30610	1	0.526	evgtrinTRINITY_DN63964c1_g1_i3	73.84	344	85	3	18	356	121	464	0	536	356	465	95	95
AT3G19590	1	0.526	evgtrinTRINITY_DN69748c2_g4_i6	86.36	308	42	0	4	311	3	310	0	563	349	340	88	88
AT5G47710	3	0.525	evgtrinTRINITY_DN65614c4_g1_i1	54.32	162	72	2	1	160	1	162	2e-57	181	182	166	88	88
AT5G47710	3	0.525	evgtrinTRINITY_DN65614c4_g1_i2	54.32	162	72	2	1	160	1	162	2e-57	181	180	166	89	89
AT5G23260	2	0.524	evgvelvLoc147810d391324t1	46.73	107	51	2	1	105	76	178	3e-23	92	110	252	95	95
AT1G11820	1	0.524	evgtrinTRINITY_DN69778c0_g1_i2	73.4	500	122	3	25	524	23	511	0	790	531	511	94	94
AT5G09900	1	0.524	evgtrinTRINITY_DN71536c1_g5_i1	78.68	441	94	0	1	441	1	441	0	720	442	442	99	99
AT1G11820	1	0.524	evgtrinTRINITY_DN72933c1_g1_i3	71.43	462	124	3	31	486	22	481	0	706	505	511	90	90
AT4G38430	1	0.524	evgtrinTRINITY_DN73548c0_g3_i3	68.64	574	147	12	1	567	1	548	0	731	567	548	100	100
AT4G38430	1	0.524	evgtrinTRINITY_DN73548c0_g3_i4	68.06	576	150	12	1	570	1	548	0	741	570	548	100	100
AT2G33560	1	0.524	evgtrinTRINITY_DN69689c1_g1_i7	55.22	393	158	5	4	382	7	395	3e-148	429	382	395	99	99
AT5G23910	1	0.524	evgtrinTRINITY_DN75410c1_g1_i3	36.92	707	376	19	31	689	21	705	5e-112	357	690	705	96	96
AT5G23910	1	0.524	evgtrinTRINITY_DN75410c1_g1_i6	36.83	619	323	19	1	572	104	701	2e-87	289	573	701	99	99
AT4G38430	1	0.524	evgvelvLoc62975d315283t1	84.93	146	19	2	1	146	68	210	7e-82	254	146	548	100	100
AT4G38430	1	0.524	evgvelvLoc54209d24347t1	86.52	141	16	2	1	141	68	205	9e-80	249	141	548	100	100
AT5G09900	1	0.524	evgtrinTRINITY_DN69814c1_g9_i3	69.83	116	35	0	1	116	326	441	7e-51	169	117	442	99	99
AT5G09900	1	0.524	evgtrinTRINITY_DN69814c1_g9_i2	69.83	116	35	0	1	116	326	441	8e-51	169	117	442	99	99
AT4G38430	1	0.524	evgtrinTRINITY_DN73548c0_g3_i1	68.7	131	31	4	1	129	1	123	5e-38	136	129	548	100	100
AT5G09900	1	0.524	evgvelvLoc55446d307975t1	71.67	60	17	0	58	117	7	66	2e-22	92	117	462	51	51
AT5G23910	1	0.524	evgvelvLoc65919d524455t1	40.68	59	28	1	63	114	639	697	2e-05	42.7	116	701	45	45
AT5G41970	1	0.523	evgtrinTRINITY_DN72518c0_g2_i8	73.39	372	95	3	1	368	2	373	0	572	368	373	100	100
AT1G72050	1	0.523	evgtrinTRINITY_DN74952c1_g8_i3	48.1	316	110	3	4	266	4	318	7e-97	292	286	324	92	92
AT1G72050	1	0.523	evgtrinTRINITY_DN74952c1_g8_i5	48.55	311	107	2	4	261	4	314	7e-97	292	286	324	90	90
AT1G72050	1	0.523	evgtrinTRINITY_DN74952c1_g8_i4	57.38	122	47	2	4	120	113	234	3e-40	139	123	324	95	95
AT1G72050	1	0.523	evgtrinTRINITY_DN74952c1_g6_i2	52	100	45	2	34	130	9	108	2e-22	93.6	174	427	56	56
AT1G72050	1	0.523	evgtrinTRINITY_DN74952c1_g6_i7	53.57	84	37	2	7	88	25	108	4e-20	86.3	139	427	59	59
AT1G72050	1	0.523	evgtrinTRINITY_DN74952c1_g2_i1	49.38	81	38	1	26	103	90	170	1e-19	83.6	110	412	71	71
AT1G72050	1	0.523	evgvelvLoc23823t2	54.88	82	35	2	7	86	10	91	1e-19	85.1	139	412	58	58
AT5G65410	1	0.523	evgvelvLoc125586d584774t1	48.19	83	31	1	17	99	191	261	7e-18	77.4	110	279	75	75
AT5G41970	1	0.523	evgvelvLoc158018d616891t1	76.19	21	5	0	1	21	151	171	0.0002	39.7	103	373	20	20
AT2G16440	1	0.522	evgtrinTRINITY_DN71178c0_g1_i3	72.56	849	210	6	1	828	1	847	0	1238	828	847	100	100
AT1G03780	1	0.522	evgtrinTRINITY_DN71299c0_g1_i1	58.88	771	272	12	6	756	13	758	0	798	756	758	99	99
AT2G47900	1	0.522	evgtrinTRINITY_DN75785c0_g2_i8	77.04	405	90	3	1	403	1	404	0	631	413	406	98	98
AT1G32190	1	0.522	evgtrinTRINITY_DN70681c0_g1_i5	75.28	267	60	3	1	262	1	266	2e-142	411	262	422	100	100
AT1G32190	1	0.522	evgtrinTRINITY_DN65628c1_g2_i7	58.27	278	74	3	1	253	36	296	2e-98	296	271	337	93	93
AT2G47900	1	0.522	evgtrinTRINITY_DN75785c0_g1_i1	76.58	158	36	1	1	157	47	204	5e-87	264	157	406	100	100
AT3G02820	1	0.522	evgtrinTRINITY_DN64477c0_g3_i2	47.35	283	134	6	8	285	4	276	2e-80	249	292	282	95	95
AT2G47900	1	0.522	evgtrinTRINITY_DN60164c0_g1_i2	77.78	153	33	1	1	152	254	406	3e-73	229	152	406	100	100
AT1G32190	1	0.522	evgvelvLoc82381d541350t1	72.22	72	20	0	5	76	133	204	1e-32	119	110	337	65	65
AT4G39010	5	0.521	evgtrinTRINITY_DN68168c0_g1_i2	70.7	273	79	1	26	297	23	295	1e-145	420	311	389	87	87
AT4G39010	5	0.521	evgtrinTRINITY_DN68168c0_g1_i2utrorf	72.77	202	55	0	1	202	293	494	3e-102	308	205	497	99	99
AT4G39010	5	0.521	evgtrinTRINITY_DN68168c0_g1_i4utrorf	71.78	202	57	0	1	202	293	494	6e-101	305	205	497	99	99
AT4G39010	5	0.521	evgvelvLoc249609t1	65.22	46	15	1	1	45	96	141	4e-15	68.6	49	389	92	92
AT4G15620	2	0.521	evgvelvLoc33138d489918t1	38.46	104	61	1	19	119	86	189	5e-17	75.1	132	190	77	77
AT1G18450	1	0.521	evgtrinTRINITY_DN66976c0_g1_i1	76.73	447	92	5	1	441	1	441	0	733	441	441	100	100
AT2G01820	2	0.52	evgtrinTRINITY_DN72344c0_g2_i4	45.49	842	362	22	10	834	9	770	0	644	834	943	99	99
AT3G47600	2	0.52	evgtrinTRINITY_DN66617c2_g2_i3	52.23	337	104	8	1	299	1	318	6e-107	319	316	333	95	95
AT2G01820	2	0.52	evgvelvLoc760d511t1	44.05	84	37	1	1	74	860	943	1e-13	66.6	74	943	100	100
AT4G28220	1	0.52	evgtrinTRINITY_DN61261c0_g1_i4	71.54	520	148	0	61	580	52	571	0	812	580	571	90	90
AT5G61430	1	0.52	evgtrinTRINITY_DN66227c0_g1_i5	60.55	365	115	8	1	365	1	336	7e-151	433	365	336	100	100
AT5G61430	1	0.52	evgtrinTRINITY_DN66227c0_g1_i3	58.9	365	121	8	1	365	1	336	2e-141	409	365	336	100	100
AT5G61430	1	0.52	evgvelvLoc14482t2	79.75	158	29	2	9	166	14	168	4e-90	271	193	336	82	82
AT5G61430	1	0.52	evgtrinTRINITY_DN66227c0_g1_i2	55.95	227	81	6	1	227	9	216	7e-78	239	227	273	100	100
AT1G63690	4	0.519	evgtrinTRINITY_DN73355c0_g9_i1	77.66	470	104	1	57	526	24	492	0	760	526	540	89	89
AT1G63690	4	0.519	evgtrinTRINITY_DN62292c0_g2_i3	68.73	275	85	1	24	298	24	297	8e-134	394	298	540	92	92
AT1G63690	4	0.519	evgtrinTRINITY_DN73355c0_g9_i5	82.07	145	25	1	2	145	395	539	7e-81	251	145	540	99	99
AT1G63690	4	0.519	evgtrinTRINITY_DN73355c0_g9_i2	81.38	145	26	1	2	145	395	539	1e-79	248	145	540	99	99
AT1G63690	4	0.519	evgvelvLoc2427t3	78.26	46	9	1	1	46	202	246	1e-16	73.9	58	540	79	79
AT5G20830	2	0.519	evgtrinTRINITY_DN59579c0_g1_i2	82.96	405	69	0	1	405	404	808	0	724	405	808	100	100
AT5G20830	2	0.519	evgtrinTRINITY_DN72255c0_g1_i1utrorf	79.56	318	65	0	1	318	491	808	0	542	318	808	100	100
AT5G20830	2	0.519	evgvelvLoc9848d262982t1	66.91	139	22	1	1	139	472	586	1e-55	187	139	808	100	100
AT5G54670	2	0.519	evgvelvLoc51343d509269t1	48.33	120	61	1	45	163	4	123	5e-30	117	163	754	73	73
AT1G49480	2	0.519	evgtrinTRINITY_DN63134c0_g1_i4	38.51	161	90	5	277	434	70	224	1e-22	98.6	566	226	50	28
AT5G54670	2	0.519	evgvelvLoc67999d320108t1	53.23	62	29	0	43	104	4	65	3e-14	70.5	141	754	44	44
AT1G49480	2	0.519	evgtrinTRINITY_DN58622c0_g2_i7	27.78	180	119	5	71	242	45	221	3e-13	67.4	263	226	91	65
AT5G54670	2	0.519	evgvelvLoc84186t2	62.75	51	18	1	62	112	542	591	1e-12	65.1	112	694	46	46
AT1G49480	2	0.519	evgtrinTRINITY_DN72943c0_g1_i12	32.14	112	71	3	106	216	101	208	3e-12	63.9	221	226	50	50
AT1G49480	2	0.519	evgvelvLoc30927d487541t1	30.08	123	80	4	49	170	100	217	8e-12	61.6	177	226	69	69
AT4G31880	1	0.519	evgtrinTRINITY_DN74916c1_g2_i1	38.89	959	453	26	1	913	1	872	7e-152	474	916	872	99	99
AT4G31880	1	0.519	evgvelvLoc26515d482806t2	48.91	229	114	3	1	228	1	227	2e-62	221	501	873	46	46
AT4G31880	1	0.519	evgvelvLoc91908d342600t1	50	216	101	3	3	217	8	217	3e-61	207	217	872	99	99
AT4G31880	1	0.519	evgvelvLoc56653d514811t1	47.37	228	116	2	5	232	3	226	5e-58	199	245	872	93	93
AT4G31880	1	0.519	evgvelvLoc160075d618929t1	65.15	132	46	0	2	133	69	200	9e-55	188	210	872	63	63
AT4G31880	1	0.519	evgvelvLoc13860d267075t3	57.5	160	65	3	3	162	70	226	5e-52	186	354	873	45	45
AT4G31880	1	0.519	evgtrinTRINITY_DN66368c2_g2_i11	59.71	139	56	0	1	139	67	205	5e-51	175	142	872	98	98
AT4G31880	1	0.519	evgtrinTRINITY_DN66368c2_g2_i13	53.85	143	66	0	17	159	15	157	5e-45	159	159	872	90	90
AT4G31880	1	0.519	evgvelvLoc13608t4	56.45	124	51	2	1	122	104	226	5e-38	140	176	873	69	69
AT4G31880	1	0.519	evgtrinTRINITY_DN74916c0_g2_i1	62.24	98	37	0	10	107	67	164	1e-35	130	107	872	92	92
AT4G31880	1	0.519	evgtrinTRINITY_DN66368c2_g2_i4	51.22	123	58	2	3	124	1	122	5e-33	124	124	873	98	98
AT4G31880	1	0.519	evgvelvLoc83357d542336t1	47.62	126	62	1	1	126	1	122	2e-30	117	126	872	100	100
AT4G31880	1	0.519	evgvelvLoc13608t5	51.2	125	59	2	1	124	104	227	5e-30	115	132	873	94	94
AT4G31880	1	0.519	evgvelvLoc81513d540464t1	53.77	106	48	1	10	115	9	113	4e-28	110	115	873	92	92
AT4G31880	1	0.519	evgvelvLoc24792d480932t1	46.15	117	51	3	6	111	138	253	5e-28	113	208	873	51	51
AT4G31880	1	0.519	evgvelvLoc57229d515414t1	47.5	120	59	2	1	120	111	226	9e-28	109	133	873	90	90
AT4G31880	1	0.519	evgvelvLoc57173d309655t1	47.01	117	62	0	5	121	3	119	2e-26	105	121	872	97	97
AT4G31880	1	0.519	evgvelvLoc2488t2	48.94	94	45	1	1	91	133	226	3e-25	103	165	873	55	55
AT4G31880	1	0.519	evgtrinTRINITY_DN76044c0_g4_i3	49.45	91	46	0	20	110	11	101	3e-23	95.9	110	873	83	83
AT4G31880	1	0.519	evgvelvLoc34472t1	47.47	99	39	2	9	107	14	99	3e-18	81.3	107	873	93	93
AT4G31880	1	0.519	evgvelvLoc84882t1	52.11	71	32	1	1	69	156	226	3e-18	81.3	106	872	65	65
AT4G31880	1	0.519	evgtrinTRINITY_DN72635c0_g1_i3	32.78	299	160	10	190	471	462	736	5e-18	88.6	581	872	49	49
AT4G31880	1	0.519	evgtrinTRINITY_DN76044c0_g8_i1	45.33	75	40	1	1	75	150	223	2e-15	72.8	103	873	73	73
AT4G31880	1	0.519	evgvelvLoc3969t4	41.07	56	30	1	1	56	174	226	3e-06	45.8	131	872	43	43
AT4G31880	1	0.519	evgvelvLoc133219d53157t1	34.38	64	41	1	1	64	174	236	1e-05	43.5	89	872	72	72
AT2G22670	2	0.518	evgtrinTRINITY_DN65975c0_g2_i4	54.49	356	96	6	111	464	19	310	2e-115	346	475	319	75	75
AT3G62840	2	0.518	evgtrinTRINITY_DN61476c0_g1_i10	91.67	108	9	0	1	108	1	108	1e-68	205	108	108	100	100
AT3G62840	2	0.518	evgtrinTRINITY_DN61476c0_g1_i12	90.74	108	10	0	1	108	1	108	4e-68	204	108	108	100	100
AT2G22670	2	0.518	evgvelvLoc2689d1707t3	53.96	139	32	3	1	133	206	318	2e-42	145	134	321	99	99
AT5G38330	2	0.518	evgtrinTRINITY_DN59084c1_g4_i1	38.78	49	29	1	54	102	75	122	3e-05	40.4	105	122	47	47
AT1G30690	1	0.518	evgtrinTRINITY_DN73456c1_g2_i5	55.76	495	160	8	41	483	48	535	8e-178	514	486	540	91	91
AT1G61870	1	0.518	evgtrinTRINITY_DN69509c0_g1_i2	61.56	398	147	4	3	395	12	408	4e-174	496	395	408	99	99
AT1G61870	1	0.518	evgtrinTRINITY_DN69509c0_g1_i5	58.84	379	154	2	19	395	30	408	9e-165	473	395	408	95	95
AT1G61870	1	0.518	evgtrinTRINITY_DN64682c0_g1_i2	56.73	379	162	2	16	392	30	408	6e-156	450	392	408	96	96
AT1G30690	1	0.518	evgtrinTRINITY_DN73456c1_g1_i2	62.5	272	91	4	1	268	271	535	1e-120	360	268	540	100	100
AT1G30690	1	0.518	evgtrinTRINITY_DN65602c0_g1_i3	44.61	343	176	7	74	411	202	535	3e-93	295	422	540	80	80
AT1G61870	1	0.518	evgvelvLoc22634d275805t1	58.29	187	78	0	1	187	213	399	1e-76	239	188	408	99	99
AT1G61870	1	0.518	evgtrinTRINITY_DN74059c0_g1_i2	32.55	381	249	6	19	395	31	407	7e-64	213	396	408	95	95
AT1G61870	1	0.518	evgtrinTRINITY_DN74059c0_g1_i1	31.76	381	252	6	19	395	31	407	9e-64	213	396	408	95	95
AT1G30690	1	0.518	evgvelvLoc66541d318719t1	61.68	107	36	2	70	176	199	300	7e-39	140	179	540	60	60
AT1G30690	1	0.518	evgtrinTRINITY_DN73456c1_g1_i8	68.18	88	25	2	1	87	370	455	5e-33	122	131	540	66	66
AT3G17680	1	0.518	evgtrinTRINITY_DN53269c0_g2_i1	39.69	131	73	2	1	130	122	247	2e-17	79	182	313	71	71
AT3G17680	1	0.518	evgvelvLoc101714d351625t2	38.93	131	74	2	6	135	166	291	3e-17	78.6	179	357	73	73
AT3G17680	1	0.518	evgtrinTRINITY_DN55874c0_g1_i1	37.6	125	73	1	4	128	122	241	2e-16	76.3	208	313	60	60
AT3G18960	1	0.518	evgtrinTRINITY_DN68059c1_g3_i4	32.46	114	76	1	3	115	17	130	2e-14	70.1	264	194	43	43
AT3G18960	1	0.518	evgvelvLoc227336t1	31.19	109	74	1	33	140	17	125	1e-12	63.5	169	194	64	64
AT3G18960	1	0.518	evgtrinTRINITY_DN66246c1_g1_i7	32.71	107	71	1	27	132	20	126	2e-12	67.8	532	209	20	20
AT3G18960	1	0.518	evgtrinTRINITY_DN66246c1_g1_i3	33.33	102	66	2	31	131	25	125	2e-11	64.3	565	209	18	18
AT3G26932	4	0.517	evgtrinTRINITY_DN75649c3_g1_i4	71.57	204	46	2	4	207	1	192	4e-99	304	428	359	48	48
AT3G26932	4	0.517	evgtrinTRINITY_DN71893c0_g3_i8	81.13	159	30	0	1	159	1	159	2e-95	285	174	359	91	91
AT3G26932	4	0.517	evgtrinTRINITY_DN75649c3_g1_i5	79.87	159	32	0	4	162	1	159	1e-94	283	167	359	95	95
AT3G26932	4	0.517	evgtrinTRINITY_DN71893c0_g2_i1	68.34	199	54	1	1	199	1	190	1e-89	281	481	359	41	41
AT3G26932	4	0.517	evgtrinTRINITY_DN71893c0_g2_i2	66.83	199	57	1	1	199	1	190	1e-86	277	581	359	34	34
AT3G26932	4	0.517	evgvelvLoc267906t1	82.68	127	22	0	1	127	4	130	2e-76	234	128	359	99	99
AT3G26932	4	0.517	evgvelvLoc133061d592212t1	65.98	97	32	1	1	96	28	124	3e-38	134	122	301	79	79
AT2G34650	1	0.517	evgtrinTRINITY_DN68474c0_g1_i3	61.5	452	155	8	5	452	2	438	0	535	452	438	99	99
AT1G24764	1	0.517	evgtrinTRINITY_DN73921c1_g1_i2	74.25	369	91	3	1	366	109	476	0	543	370	481	99	99
AT1G24764	1	0.517	evgtrinTRINITY_DN73921c1_g1_i3	74.04	366	94	1	1	365	109	474	0	546	371	481	98	98
AT3G23670	1	0.517	evgtrinTRINITY_DN74036c0_g2_i1	57.51	1198	412	26	1	1165	180	1313	0	1245	1165	1313	100	100
AT3G23670	1	0.517	evgtrinTRINITY_DN74036c0_g2_i5	68.7	508	135	7	1	501	1	491	0	693	506	971	99	99
AT1G24764	1	0.517	evgtrinTRINITY_DN62519c0_g1_i5	83.6	311	45	2	35	339	25	335	1e-176	509	339	634	90	90
AT1G24764	1	0.517	evgtrinTRINITY_DN70258c0_g2_i1	49.65	576	238	9	13	574	69	606	3e-167	495	581	634	97	97
AT1G24764	1	0.517	evgtrinTRINITY_DN62976c0_g1_i1	68.25	337	103	2	1	334	109	444	1e-150	437	334	481	100	100
AT3G23670	1	0.517	evgtrinTRINITY_DN74036c0_g1_i2	58.22	359	122	5	1	356	980	1313	2e-124	391	356	1313	100	100
AT3G23670	1	0.517	evgtrinTRINITY_DN67373c0_g1_i1	48.68	493	210	11	2	474	500	969	6e-118	379	474	1313	99	99
AT2G34650	1	0.517	evgtrinTRINITY_DN68474c0_g2_i2	61.77	293	99	4	5	297	2	281	7e-113	337	297	438	99	99
AT4G37210	1	0.517	evgtrinTRINITY_DN67135c0_g1_i2	46.56	479	206	9	38	483	28	489	4e-112	345	500	492	89	89
AT4G37210	1	0.517	evgtrinTRINITY_DN67135c0_g1_i1	45.49	466	213	9	42	478	32	485	2e-106	330	499	492	88	88
AT2G34650	1	0.517	evgtrinTRINITY_DN54901c0_g1_i1	60	160	61	1	1	160	282	438	9e-63	202	160	438	100	100
AT3G23670	1	0.517	evgtrinTRINITY_DN72455c1_g5_i1	59.9	202	67	6	1	200	31	220	1e-62	211	200	971	100	100
AT2G34650	1	0.517	evgtrinTRINITY_DN68474c0_g1_i5	55.1	147	59	2	1	145	297	438	3e-52	174	145	438	100	100
AT3G23670	1	0.517	evgvelvLoc272462t1	49.14	116	58	1	1	116	740	854	1e-26	106	118	1313	98	98
AT4G24050	6	0.516	evgtrinTRINITY_DN63076c0_g1_i8	61.13	283	71	1	1	283	79	322	3e-124	363	295	332	96	96
AT4G24130	3	0.516	evgtrinTRINITY_DN55282c0_g1_i1	61.94	155	47	2	12	166	8	150	1e-63	197	178	157	87	87
AT4G24130	3	0.516	evgtrinTRINITY_DN55282c0_g1_i2	61.29	155	44	2	15	169	12	150	6e-62	193	197	157	79	79
AT4G24130	3	0.516	evgvelvLoc108039d357304t1	57.05	149	61	1	46	191	6	154	5e-54	172	191	157	76	76
AT4G24130	3	0.516	evgvelvLoc116393d364763t1	58.74	143	56	1	5	144	12	154	8e-54	170	144	157	97	97
AT4G24130	3	0.516	evgvelvLoc116393t2	57.43	148	60	1	27	171	7	154	8e-54	171	171	157	85	85
AT4G24130	3	0.516	evgvelvLoc71909d530630t1	58.04	143	57	1	5	144	12	154	2e-53	169	144	157	97	97
AT4G24130	3	0.516	evgvelvLoc38686d495869t1	57.34	143	58	1	5	144	12	154	6e-53	168	144	157	97	97
AT4G24130	3	0.516	evgtrinTRINITY_DN61065c2_g2_i4	59.7	134	51	1	5	135	12	145	1e-50	162	135	157	97	97
AT4G24130	3	0.516	evgtrinTRINITY_DN73239c0_g4_i1	53.47	144	64	1	5	145	12	155	9e-49	157	145	157	97	97
AT4G24130	3	0.516	evgtrinTRINITY_DN73239c0_g4_i2	52.41	145	65	2	5	146	12	155	4e-48	156	146	157	97	97
AT4G24130	3	0.516	evgtrinTRINITY_DN61065c2_g2_i1	58.91	129	50	1	1	126	17	145	5e-48	155	126	157	100	100
AT4G24130	3	0.516	evgtrinTRINITY_DN60965c0_g1_i2	54.48	145	61	2	7	148	12	154	1e-46	152	154	157	92	92
AT4G24130	3	0.516	evgvelvLoc114595d363164t1	60	125	47	1	7	128	12	136	1e-45	149	138	157	88	88
AT4G24130	3	0.516	evgtrinTRINITY_DN73298c0_g1_i1	55.47	128	52	2	1	125	29	154	8e-42	139	125	157	100	100
AT4G24130	3	0.516	evgvelvLoc183846t1	61.82	110	42	0	29	138	6	115	1e-41	139	138	157	80	80
AT4G24130	3	0.516	evgtrinTRINITY_DN61065c2_g2_i5	58.82	119	46	1	5	120	12	130	5e-41	137	120	157	97	97
AT4G24130	3	0.516	evgvelvLoc78484d330076t1	59.65	114	46	0	29	142	7	120	4e-40	135	145	157	79	79
AT4G24130	3	0.516	evgtrinTRINITY_DN73239c0_g2_i3	61.17	103	37	1	1	100	48	150	2e-39	132	102	157	98	98
AT4G24130	3	0.516	evgvelvLoc4650d257565t1	50	138	65	2	5	139	12	148	2e-39	134	167	157	81	81
AT4G24130	3	0.516	evgtrinTRINITY_DN61065c2_g4_i1	63.27	98	36	0	5	102	12	109	1e-37	127	103	157	95	95
AT4G24130	3	0.516	evgvelvLoc18592d9766t1	60.4	101	40	0	3	103	12	112	1e-36	125	103	157	98	98
AT4G24130	3	0.516	evgvelvLoc18592t6	60.4	101	40	0	5	105	12	112	6e-36	123	105	157	96	96
AT4G24130	3	0.516	evgvelvLoc266660t1	53.92	102	47	0	5	106	12	113	4e-32	113	106	157	96	96
AT4G24130	3	0.516	evgtrinTRINITY_DN73298c1_g8_i6	50.45	111	51	2	1	108	39	148	2e-31	112	115	157	94	94
AT4G24130	3	0.516	evgvelvLoc47940d505681t1	55.43	92	41	0	5	96	12	103	2e-27	101	101	157	91	91
AT4G24130	3	0.516	evgvelvLoc61486t3	57.14	77	30	1	11	84	78	154	5e-25	94.4	88	157	84	84
AT4G24130	3	0.516	evgvelvLoc86228t2	57.58	66	25	1	3	65	83	148	2e-17	77	170	157	37	37
AT5G43600	2	0.516	evgtrinTRINITY_DN62478c0_g1_i6	74.29	315	71	4	29	340	29	336	1e-155	450	340	476	92	92
AT5G13980	1	0.516	evgtrinTRINITY_DN73881c1_g1_i5	68.54	1014	297	8	11	1007	3	1011	0	1462	1016	1024	98	98
AT2G25100	1	0.516	evgtrinTRINITY_DN64745c0_g1_i4	70.61	296	87	0	1	296	1	296	4e-161	455	296	296	100	100
AT3G49080	1	0.516	evgtrinTRINITY_DN70646c0_g1_i3	63.76	287	96	3	190	474	150	430	3e-112	342	474	430	60	60
AT1G34355	1	0.516	evgtrinTRINITY_DN74287c2_g2_i6	41.29	511	213	15	179	623	829	1318	2e-90	307	626	1318	71	71
AT1G34355	1	0.516	evgtrinTRINITY_DN74287c2_g2_i9	37.71	586	268	14	104	623	764	1318	5e-90	306	626	1318	83	83
AT5G13980	1	0.516	evgtrinTRINITY_DN73881c1_g1_i2	69.92	123	27	1	11	123	3	125	2e-54	184	127	921	89	89
AT3G17350	1	0.515	evgtrinTRINITY_DN61722c0_g1_i3	61.48	270	79	3	54	322	26	271	1e-115	342	366	278	73	73
AT2G39510	1	0.515	evgtrinTRINITY_DN57202c0_g1_i2	40.21	373	208	5	3	371	2	363	8e-84	263	376	374	98	98
AT2G39510	1	0.515	evgtrinTRINITY_DN60397c0_g1_i1	38.53	340	196	3	3	339	2	331	2e-80	254	375	374	90	90
AT4G28230	1	0.515	evgtrinTRINITY_DN69643c0_g1_i2	37.76	482	203	18	1	465	1	402	6e-70	231	475	402	98	98
AT4G28230	1	0.515	evgtrinTRINITY_DN69643c0_g2_i2	37.79	471	206	18	1	453	1	402	1e-68	228	461	402	98	98
AT3G10010	1	0.515	evgtrinTRINITY_DN45869c0_g1_i1	79.61	103	21	0	1	103	814	916	8e-53	180	103	1332	100	100
AT4G28230	1	0.515	evgvelvLoc63704d522158t1	41.79	280	128	9	17	290	91	341	6e-50	174	309	402	89	89
AT2G39510	1	0.515	evgtrinTRINITY_DN64612c0_g1_i5	31.58	342	207	8	8	332	3	334	6e-43	155	343	374	95	95
AT2G39510	1	0.515	evgtrinTRINITY_DN56978c0_g2_i1	42.76	152	87	0	3	154	2	153	2e-39	140	179	374	85	85
AT4G28230	1	0.515	evgvelvLoc1611d455175t1	45.78	83	40	1	38	120	95	172	3e-12	63.2	120	402	69	69
AT3G10010	1	0.515	evgtrinTRINITY_DN65974c1_g1_i1	58.14	43	18	0	443	485	785	827	1e-09	61.6	485	1332	9	9
AT3G10010	1	0.515	evgtrinTRINITY_DN65974c1_g1_i2	58.14	43	18	0	447	489	785	827	1e-09	61.6	489	1332	9	9
AT1G47970	1	0.515	evgtrinTRINITY_DN61874c0_g1_i2	60	80	26	3	152	229	123	198	2e-07	50.4	229	198	34	34
AT2G39510	1	0.515	evgtrinTRINITY_DN72271c0_g5_i3	33.33	96	29	2	1	96	270	330	2e-07	49.7	148	374	65	65
AT4G35880	2	0.514	evgtrinTRINITY_DN67279c1_g2_i4	59.32	526	201	5	1	519	1	520	0	633	531	524	98	98
AT4G35880	2	0.514	evgtrinTRINITY_DN70244c0_g1_i1	54.18	467	204	5	12	473	6	467	2e-175	509	527	524	88	88
AT4G35880	2	0.514	evgtrinTRINITY_DN71474c0_g1_i6	55.44	469	197	8	9	470	4	467	5e-175	509	551	524	84	84
AT4G35880	2	0.514	evgvelvLoc4965d458971t1	40.47	472	225	13	3	430	1	460	2e-100	316	515	524	83	83
AT4G35880	2	0.514	evgtrinTRINITY_DN64200c0_g3_i4	48.81	295	139	5	1	291	174	460	2e-87	277	362	524	80	80
AT4G35880	2	0.514	evgtrinTRINITY_DN64200c0_g3_i5	50	236	109	3	5	237	198	427	3e-71	228	241	440	97	97
AT5G63110	1	0.514	evgtrinTRINITY_DN68922c0_g1_i4	80.41	434	84	1	3	435	2	435	0	746	551	471	79	79
AT3G63090	1	0.514	evgtrinTRINITY_DN75126c0_g2_i1	69.08	359	111	0	52	410	31	389	0	516	423	404	85	85
AT3G61650	1	0.514	evgtrinTRINITY_DN75404c0_g6_i2	92.48	439	33	0	1	439	1	439	0	861	439	474	100	100
AT3G61650	1	0.514	evgtrinTRINITY_DN75404c0_g6_i7	91	411	37	0	1	411	1	411	0	787	411	474	100	100
AT1G61010	1	0.514	evgtrinTRINITY_DN75471c0_g3_i3	80.38	520	99	2	1	517	174	693	0	886	518	693	99	99
AT1G61010	1	0.514	evgtrinTRINITY_DN75471c0_g3_i8	80.19	520	100	2	1	517	174	693	0	881	518	693	99	99
AT5G63110	1	0.514	evgvelvLoc18866d272079t1	78.93	299	62	1	1	298	134	432	8e-179	507	298	471	100	100
AT1G61010	1	0.514	evgtrinTRINITY_DN75471c0_g1_i4	86.53	193	22	2	1	191	1	191	5e-118	354	191	693	100	100
AT1G61010	1	0.514	evgtrinTRINITY_DN75471c0_g1_i3	84.97	193	25	2	1	191	1	191	3e-116	350	191	693	100	100
AT5G67260	1	0.514	evgtrinTRINITY_DN68014c0_g4_i1	57.64	288	109	4	4	286	88	367	1e-111	331	286	367	99	99
AT1G61010	1	0.514	evgtrinTRINITY_DN75471c0_g3_i5	89.21	139	15	0	1	139	174	312	2e-87	272	139	693	100	100
AT3G13570	1	0.514	evgtrinTRINITY_DN67866c0_g3_i7	66.51	218	66	3	1	213	1	216	1e-83	254	236	262	90	90
AT1G74300	1	0.514	evgtrinTRINITY_DN71024c0_g1_i15	51.26	199	97	0	1	199	47	245	2e-76	234	211	247	94	94
AT3G61650	1	0.514	evgvelvLoc27924t5	92.79	111	8	0	1	111	236	346	3e-69	218	111	474	100	100
AT3G61650	1	0.514	evgvelvLoc27924t4	91.43	105	9	0	1	105	236	340	7e-63	201	105	474	100	100
AT3G13570	1	0.514	evgtrinTRINITY_DN67866c0_g3_i3	62.13	169	56	2	3	171	34	194	2e-58	187	176	262	96	96
AT3G13570	1	0.514	evgtrinTRINITY_DN67866c0_g3_i16	81.91	94	17	0	3	96	34	127	2e-52	170	137	262	69	69
AT5G63110	1	0.514	evgvelvLoc85372t1	70.64	109	32	0	2	110	4	112	6e-49	164	110	471	99	99
AT3G13570	1	0.514	evgtrinTRINITY_DN71168c2_g2_i2	59.52	126	48	2	7	131	5	128	2e-43	150	229	262	55	55
AT3G13570	1	0.514	evgtrinTRINITY_DN67866c0_g3_i19	52.14	140	59	2	4	143	74	205	4e-30	112	144	262	97	97
AT3G13570	1	0.514	evgtrinTRINITY_DN66120c0_g1_i3	62.3	61	23	0	1	61	68	128	3e-22	90.9	139	262	44	44
AT2G20300	1	0.513	evgtrinTRINITY_DN74457c0_g1_i1	68.72	406	120	3	1	405	121	520	0	528	405	744	100	100
AT2G20300	1	0.513	evgtrinTRINITY_DN74457c0_g2_i2	64.77	511	165	7	50	555	25	525	0	604	555	744	91	91
AT4G24940	1	0.513	evgtrinTRINITY_DN69716c0_g5_i7	66.98	318	104	1	1	318	1	317	8e-165	466	324	322	98	98
AT3G15140	1	0.513	evgtrinTRINITY_DN64761c0_g2_i2	66.05	271	90	1	54	324	69	337	1e-140	405	324	337	84	84
AT2G20300	1	0.513	evgtrinTRINITY_DN73349c0_g1_i1	70.9	244	62	5	1	241	507	744	4e-110	337	241	744	100	100
AT2G20300	1	0.513	evgtrinTRINITY_DN62954c0_g1_i4	70.71	239	60	6	1	236	507	738	7e-106	326	241	744	98	98
AT2G20300	1	0.513	evgtrinTRINITY_DN73349c0_g1_i2	68.53	232	64	5	1	229	519	744	5e-99	308	229	744	100	100
AT1G06990	1	0.513	evgtrinTRINITY_DN70453c1_g2_i7	41.04	346	195	3	19	360	16	356	1e-94	291	365	360	94	94
AT2G20300	1	0.513	evgvelvLoc50290t1	75.49	102	25	0	3	104	99	200	1e-47	163	104	744	98	98
AT3G15140	1	0.513	evgvelvLoc5686d459777t1	29.91	107	75	0	2	108	151	257	1e-12	65.1	187	277	57	57
AT3G15140	1	0.513	evgvelvLoc9368t1	29.55	132	79	4	7	125	79	209	5e-12	62.4	144	277	83	83
AT3G15140	1	0.513	evgvelvLoc9612d464206t1	26.75	157	101	4	2	145	162	317	5e-12	65.1	245	337	59	59
AT2G20300	1	0.513	evgtrinTRINITY_DN67144c0_g2_i1	42.74	117	58	4	79	195	25	132	1e-10	60.8	195	744	60	60
AT2G20300	1	0.513	evgvelvLoc142230d601261t1	44.44	108	49	4	53	160	26	122	9e-08	51.2	160	744	68	68
AT3G15140	1	0.513	evgvelvLoc8503d462971t1	30	70	49	0	5	74	248	317	7e-06	45.1	155	337	45	45
AT3G15140	1	0.513	evgvelvLoc29212t11	28	100	56	4	6	99	124	213	9e-06	43.5	104	337	90	90
AT3G52820	3	0.512	evgtrinTRINITY_DN68035c1_g3_i7	73.79	393	103	0	29	421	26	418	0	622	440	434	89	89
AT3G52820	3	0.512	evgtrinTRINITY_DN68509c1_g1_i4	69.23	390	119	1	36	424	29	418	0	582	442	434	88	88
AT3G52820	3	0.512	evgtrinTRINITY_DN68509c1_g2_i2	74.74	384	97	0	1	384	35	418	0	620	401	434	96	96
AT3G52820	3	0.512	evgtrinTRINITY_DN68509c1_g2_i4	74.22	384	99	0	1	384	35	418	0	618	401	434	96	96
AT3G52820	3	0.512	evgtrinTRINITY_DN68035c1_g3_i1	75	216	54	0	1	216	203	418	1e-121	357	237	434	91	91
AT3G52820	3	0.512	evgvelvLoc93120d552235t1	58.73	63	26	0	36	98	29	91	7e-17	75.9	101	434	62	62
AT2G47470	2	0.512	evgtrinTRINITY_DN63419c0_g3_i3	79.62	314	64	0	1	314	45	358	0	528	314	361	100	100
AT2G47470	2	0.512	evgtrinTRINITY_DN74130c0_g4_i13	80.13	156	31	0	28	183	28	183	2e-93	280	194	335	86	80
AT2G47470	2	0.512	evgvelvLoc87925d338904t1	68.66	134	42	0	2	135	180	313	3e-59	191	146	361	92	92
AT4G00900	1	0.512	evgtrinTRINITY_DN72680c0_g1_i2	77.69	865	189	2	2	865	3	864	0	1380	867	1054	99	99
AT3G43610	1	0.512	evgtrinTRINITY_DN75307c0_g1_i6	42.5	1247	628	22	14	1231	11	1197	0	835	1242	1207	98	98
AT4G00900	1	0.512	evgtrinTRINITY_DN72680c0_g1_i3utrorf	70.35	199	54	4	41	236	856	1052	5e-83	270	237	1054	83	83
AT4G00900	1	0.512	evgvelvLoc8737d463232t1	60.16	123	46	1	1	123	462	581	1e-43	154	123	1054	100	100
AT3G43610	1	0.512	evgvelvLoc149310d608291t1	52.17	115	51	2	1	111	85	199	4e-26	104	112	1170	99	99
AT3G43610	1	0.512	evgtrinTRINITY_DN75307c0_g1_i5	32.03	153	84	3	2	137	389	538	3e-08	53.1	180	1207	76	76
AT1G52500	1	0.511	evgtrinTRINITY_DN68071c0_g1_i6	83.57	286	47	0	1	286	1	286	6e-176	497	311	390	92	92
AT3G13960	1	0.511	evgtrinTRINITY_DN59741c0_g2_i2	40.77	336	145	10	8	308	16	332	2e-62	210	426	397	71	71
AT3G13960	1	0.511	evgvelvLoc72572d324455t1	68.47	111	33	1	64	174	16	124	3e-53	177	184	397	60	60
AT4G14720	1	0.511	evgtrinTRINITY_DN75649c2_g3_i3	52.07	169	64	4	6	159	6	172	7e-43	148	178	315	87	87
AT3G13960	1	0.511	evgtrinTRINITY_DN69056c2_g2_i7	53.39	118	48	2	21	137	13	124	4e-36	133	223	397	52	52
AT3G13960	1	0.511	evgtrinTRINITY_DN74347c1_g2_i4	57.3	89	34	2	1	85	36	124	1e-30	117	183	397	46	46
AT4G14720	1	0.511	evgtrinTRINITY_DN60597c0_g1_i2	43.62	149	66	5	1	133	41	187	6e-27	104	144	315	92	92
AT4G14720	1	0.511	evgtrinTRINITY_DN69598c1_g1_i5	40.16	127	51	5	1	123	160	265	9e-14	67.4	134	315	92	92
AT1G52500	1	0.511	evgtrinTRINITY_DN68071c0_g1_i5utrorf	87.1	31	4	0	3	33	256	286	4e-10	59.3	228	390	14	14
AT1G68710	6	0.51	evgtrinTRINITY_DN58708c0_g1_i1	70.45	379	101	3	1	370	196	572	0	574	370	1200	100	100
AT1G68710	6	0.51	evgtrinTRINITY_DN75483c2_g2_i2	74.36	390	100	0	8	397	805	1194	0	630	404	1200	97	97
AT1G68710	6	0.51	evgtrinTRINITY_DN75483c2_g3_i2	77.11	699	153	2	1	694	370	1066	0	1122	694	1200	100	100
AT1G68710	6	0.51	evgtrinTRINITY_DN75483c2_g5_i1	70.3	404	114	1	1	398	196	599	0	617	398	1200	100	100
AT1G68710	6	0.51	evgtrinTRINITY_DN75483c1_g1_i2	74.57	232	57	1	2	233	586	815	3e-111	349	233	1200	99	99
AT1G68710	6	0.51	evgtrinTRINITY_DN59390c0_g1_i1	59.85	269	106	2	1	268	927	1194	2e-108	343	276	1200	97	97
AT1G68710	6	0.51	evgtrinTRINITY_DN51756c0_g1_i1	77.17	219	48	1	1	219	606	822	8e-106	333	219	1200	100	100
AT1G68710	6	0.51	evgtrinTRINITY_DN61908c0_g2_i1	67.62	210	64	1	1	206	1	210	3e-97	309	206	1226	100	100
AT1G68710	6	0.51	evgtrinTRINITY_DN75483c2_g1_i1	62.74	212	71	4	1	206	2	211	3e-84	273	206	1200	100	100
AT1G68710	6	0.51	evgtrinTRINITY_DN59307c0_g1_i2	66.22	148	50	0	2	149	1047	1194	3e-70	231	156	1200	95	95
AT1G68710	6	0.51	evgvelvLoc67968d526570t1	75	112	28	0	1	112	557	668	7e-50	172	112	1200	100	100
AT1G68710	6	0.51	evgvelvLoc87769d546829t1	60.36	111	38	1	1	105	463	573	2e-38	139	105	1200	100	100
AT5G15210	3	0.51	evgvelvLoc12570d467500t1	50.69	144	48	4	87	225	4	129	9e-34	125	250	271	56	56
AT5G15210	3	0.51	evgtrinTRINITY_DN60881c0_g1_i1	61.76	102	31	3	49	145	31	129	1e-32	119	154	271	63	63
AT4G29680	1	0.51	evgtrinTRINITY_DN67201c0_g1_i1	76.85	406	93	1	36	440	88	493	0	671	443	496	91	91
AT4G29680	1	0.51	evgtrinTRINITY_DN67201c0_g2_i2	68.59	503	141	5	9	509	7	494	0	686	511	496	98	98
AT4G23440	1	0.51	evgtrinTRINITY_DN70595c1_g1_i1	59.7	1000	351	13	1	991	1	957	0	1159	993	964	99	99
AT5G48600	1	0.51	evgtrinTRINITY_DN75577c0_g1_i2	73.83	1238	324	0	9	1246	5	1242	0	1831	1247	1244	99	99
AT1G21700	2	0.509	evgtrinTRINITY_DN66803c0_g1_i3	47.16	634	274	11	1	593	180	793	0	538	603	807	98	98
AT1G21700	2	0.509	evgtrinTRINITY_DN69158c0_g1_i2	51.37	769	281	19	75	797	72	793	0	696	807	807	90	90
AT1G76240	2	0.509	evgtrinTRINITY_DN54006c0_g1_i1	40.08	237	128	4	12	237	75	308	1e-44	155	237	308	95	95
AT2G29890	1	0.509	evgtrinTRINITY_DN75417c0_g1_i5	54.57	951	383	12	1	944	1	909	0	1017	944	909	100	100
AT5G57700	1	0.509	evgtrinTRINITY_DN69211c0_g1_i4	75.73	309	75	0	76	384	14	322	3e-174	494	386	352	80	80
AT3G02210	1	0.509	evgtrinTRINITY_DN65302c0_g1_i1	49.34	454	211	9	20	459	1	449	8e-160	464	459	452	96	96
AT2G47620	1	0.509	evgtrinTRINITY_DN69480c0_g1_i5	45.14	545	250	9	18	554	9	512	8e-132	399	561	512	96	96
AT3G02210	1	0.509	evgtrinTRINITY_DN65302c0_g1_i3	51.76	340	152	6	35	364	16	353	6e-124	369	374	452	88	88
AT5G57700	1	0.509	evgvelvLoc107415d566610t1	75	148	37	0	1	148	84	231	2e-75	232	148	352	100	100
AT1G71260	1	0.509	evgtrinTRINITY_DN64289c0_g1_i3	55.83	206	73	2	48	253	51	238	1e-74	231	253	238	81	81
AT5G57700	1	0.509	evgtrinTRINITY_DN69211c0_g4_i1	66.88	157	52	0	1	157	162	318	3e-69	217	159	348	99	99
AT5G57700	1	0.509	evgtrinTRINITY_DN69211c0_g5_i2	75.78	128	31	0	55	182	10	137	3e-67	213	182	348	70	70
AT4G17000	1	0.509	evgtrinTRINITY_DN74819c1_g1_i3	29.53	789	389	29	1	753	1	658	2e-61	221	760	661	99	99
AT5G57700	1	0.509	evgvelvLoc27374t1	73.08	104	28	0	1	104	219	322	3e-47	157	106	352	98	98
AT4G17000	1	0.509	evgtrinTRINITY_DN69836c0_g1_i4	42.21	244	120	7	15	246	10	244	6e-47	177	755	661	78	31
AT5G57700	1	0.509	evgvelvLoc220763d228549t1	66.67	51	14	1	11	61	124	171	5e-14	66.6	82	348	62	62
AT5G57700	1	0.509	evgvelvLoc24844d12454t1	89.29	28	3	0	37	64	136	163	7e-12	61.6	105	347	27	27
AT4G17000	1	0.509	evgvelvLoc106480d565677t1	34.86	109	58	4	7	113	166	263	4e-08	52.4	165	674	65	65
AT2G29890	1	0.509	evgtrinTRINITY_DN75417c0_g2_i1	31.17	77	50	2	14	87	391	467	1e-05	43.9	101	933	73	73
AT5G42760	3	0.508	evgtrinTRINITY_DN63542c0_g1_i2	65.78	339	107	3	1	333	5	340	1e-163	465	338	348	99	99
AT5G42760	3	0.508	evgvelvLoc167044t2	65.32	124	40	1	14	137	139	259	4e-50	166	138	348	90	90
AT3G19550	2	0.508	evgtrinTRINITY_DN54434c0_g1_i1	43.81	105	46	3	57	149	1	104	1e-18	78.6	155	110	60	60
AT5G65860	1	0.508	evgtrinTRINITY_DN60631c0_g1_i1	73.01	326	86	1	1	324	1	326	0	523	327	326	99	99
AT4G00990	1	0.508	evgtrinTRINITY_DN73490c0_g1_i1	41.24	839	401	21	168	989	72	835	0	592	990	840	83	83
AT1G67630	1	0.508	evgtrinTRINITY_DN74621c0_g4_i8	57.08	650	239	11	2	644	4	620	0	727	644	620	99	99
AT2G35530	1	0.508	evgtrinTRINITY_DN70543c0_g4_i3	62.1	372	116	7	30	392	35	390	2e-150	437	418	409	87	87
AT3G19120	1	0.508	evgtrinTRINITY_DN72719c0_g1_i2	77.5	200	45	0	12	211	247	446	6e-117	344	211	446	95	95
AT2G35530	1	0.508	evgtrinTRINITY_DN70027c0_g4_i4	54.86	350	130	10	32	372	42	372	1e-111	338	406	409	84	84
AT2G35530	1	0.508	evgtrinTRINITY_DN70027c0_g3_i11	52.97	370	131	11	35	382	43	391	3e-110	333	396	409	88	88
AT3G19120	1	0.508	evgtrinTRINITY_DN52353c0_g1_i1	78.91	147	31	0	26	172	91	237	3e-81	251	173	446	85	85
AT1G13790	1	0.508	evgvelvLoc153232d612172t1	53.98	113	52	0	1	113	570	682	1e-34	127	113	736	100	100
AT1G21560	1	0.508	evgtrinTRINITY_DN67418c0_g1_i1	41.67	120	67	3	262	379	205	323	7e-18	84	383	325	31	31
AT1G21560	1	0.508	evgtrinTRINITY_DN67418c0_g1_i8	41.96	112	62	3	271	380	213	323	9e-18	84	383	325	29	29
AT5G13400	3	0.507	evgtrinTRINITY_DN75480c1_g6_i2	77.47	364	80	2	1	364	254	615	0	593	364	624	100	100
AT5G13400	3	0.507	evgtrinTRINITY_DN61561c1_g3_i6	76.19	273	61	1	5	277	1	269	9e-146	427	277	624	99	99
AT1G20180	2	0.507	evgtrinTRINITY_DN66376c0_g3_i5	34.77	394	218	8	4	378	12	385	6e-61	204	386	390	97	97
AT1G20180	2	0.507	evgtrinTRINITY_DN59052c0_g1_i1	46.85	143	73	2	1	140	246	388	6e-35	127	159	390	88	88
AT1G20180	2	0.507	evgtrinTRINITY_DN59052c0_g3_i1	32.6	181	107	4	44	212	8	185	6e-18	81.6	220	359	77	77
AT1G20180	2	0.507	evgvelvLoc198382t1	30.12	83	58	0	14	96	193	275	2e-05	42.7	100	390	83	83
AT3G48670	1	0.507	evgtrinTRINITY_DN67858c0_g3_i2	50.55	633	289	6	15	632	21	644	0	613	632	647	98	98
AT2G44150	1	0.507	evgtrinTRINITY_DN70607c1_g1_i10	67.57	370	108	7	1	366	1	362	2e-159	457	371	363	99	99
AT3G58560	1	0.507	evgtrinTRINITY_DN73150c0_g3_i1	68.18	330	91	5	1	327	1	319	7e-157	457	327	602	100	100
AT3G58560	1	0.507	evgtrinTRINITY_DN72896c1_g1_i1	44.48	598	295	9	5	566	5	601	5e-156	464	573	602	98	98
AT3G58560	1	0.507	evgtrinTRINITY_DN72896c1_g1_i3	44.33	582	287	9	5	550	5	585	1e-148	445	550	602	99	99
AT4G25550	1	0.507	evgtrinTRINITY_DN71125c0_g3_i10	85.43	199	29	0	4	202	2	200	2e-132	374	202	200	99	99
AT4G25550	1	0.507	evgtrinTRINITY_DN71125c0_g3_i2	56.59	258	49	4	4	261	2	196	2e-91	273	261	200	99	99
AT1G78430	1	0.507	evgtrinTRINITY_DN63154c0_g1_i8	47.76	402	126	14	2	400	4	324	2e-72	233	400	324	99	99
AT1G78430	1	0.507	evgvelvLoc5548d459622t1	50.81	185	75	4	23	207	142	310	3e-33	124	208	324	89	89
AT3G48670	1	0.507	evgvelvLoc50897d508797t1	33.33	246	127	8	45	261	397	634	1e-25	107	266	647	82	82
AT3G48670	1	0.507	evgvelvLoc131017d377471t1	44.9	49	27	0	38	86	505	553	2e-07	49.3	110	647	45	45
AT5G40640	2	0.506	evgtrinTRINITY_DN66292c1_g5_i11	63.18	459	162	4	1	453	1	458	0	600	454	586	99	99
AT3G25810	2	0.506	evgtrinTRINITY_DN75866c0_g1_i3	43.49	361	185	6	1	353	246	595	1e-102	318	354	598	99	99
AT5G40640	2	0.506	evgvelvLoc39583t4	55.6	277	116	4	1	274	299	571	4e-92	288	282	586	97	97
AT5G40640	2	0.506	evgtrinTRINITY_DN74832c0_g4_i14	65.24	187	64	1	4	190	177	362	2e-79	252	214	586	87	87
AT5G40640	2	0.506	evgtrinTRINITY_DN74832c0_g4_i1	65.24	187	64	1	4	190	177	362	1e-77	247	217	586	86	86
AT3G25810	2	0.506	evgtrinTRINITY_DN75727c0_g1_i2utrorf	41.28	218	123	3	1	213	378	595	1e-48	170	214	598	99	99
AT2G16780	1	0.506	evgtrinTRINITY_DN63504c0_g1_i2	64.94	405	135	5	1	402	1	401	0	536	407	415	99	99
AT1G29980	1	0.506	evgtrinTRINITY_DN64705c0_g1_i1	73.24	355	86	1	33	378	35	389	0	550	397	407	87	87
AT1G57820	1	0.506	evgtrinTRINITY_DN71006c0_g1_i12	66.72	604	184	9	1	594	32	628	0	814	765	645	78	78
AT1G57820	1	0.506	evgtrinTRINITY_DN71006c0_g1_i5	63.9	615	208	8	1	607	32	640	0	791	754	645	81	81
AT3G52870	1	0.506	evgtrinTRINITY_DN75940c2_g3_i4	77.27	242	55	0	128	369	45	286	1e-141	414	369	456	66	66
AT2G28790	1	0.506	evgtrinTRINITY_DN59380c0_g1_i1	68.55	248	70	3	3	249	34	274	7e-122	352	249	274	99	99
AT3G52870	1	0.506	evgtrinTRINITY_DN75940c2_g3_i2	76.06	142	34	0	128	269	45	186	5e-76	242	269	456	53	53
AT3G52870	1	0.506	evgtrinTRINITY_DN63310c1_g2_i1	80.77	130	25	0	74	203	49	178	1e-74	236	203	456	64	64
AT3G52870	1	0.506	evgvelvLoc58630d516876t1	74.19	124	32	0	1	124	73	196	4e-66	211	142	456	87	87
AT3G52870	1	0.506	evgvelvLoc16277t5	54.55	198	76	3	1	198	259	442	8e-61	202	263	456	75	75
AT3G52870	1	0.506	evgtrinTRINITY_DN75940c2_g3_i8	73.45	113	30	0	1	113	149	261	6e-55	180	113	456	100	100
AT3G52870	1	0.506	evgvelvLoc62237d520634t1	54.14	181	72	2	1	181	235	404	3e-52	176	181	456	100	100
AT3G52870	1	0.506	evgtrinTRINITY_DN75940c2_g5_i1	48.19	193	64	7	1	185	286	450	6e-44	156	236	456	78	78
AT3G52870	1	0.506	evgtrinTRINITY_DN75940c2_g5_i2	47.62	189	71	6	1	185	286	450	1e-43	155	236	456	78	78
AT3G52870	1	0.506	evgtrinTRINITY_DN53437c0_g1_i2	47.37	133	53	5	1	130	266	384	6e-28	107	130	456	100	100
AT5G04280	1	0.506	evgtrinTRINITY_DN74523c0_g1_i2	52.35	170	55	11	19	162	127	296	1e-22	93.2	170	310	85	85
AT3G52870	1	0.506	evgvelvLoc12859t3	32.22	180	55	4	12	186	304	421	1e-15	75.5	196	456	89	89
AT3G52870	1	0.506	evgtrinTRINITY_DN75940c2_g4_i2	40.87	115	48	4	8	119	274	371	3e-15	72.4	119	456	94	94
AT3G52870	1	0.506	evgvelvLoc53329t2	31.34	201	56	9	8	208	332	450	3e-09	56.6	220	456	91	91
AT3G52870	1	0.506	evgvelvLoc146333d192615t1	78.26	23	5	0	124	146	49	71	2e-05	43.9	146	456	16	16
AT1G01630	2	0.505	evgtrinTRINITY_DN65715c0_g1_i10	67.8	205	66	0	1	205	51	255	3e-107	313	205	255	100	100
AT1G79720	1	0.505	evgtrinTRINITY_DN64459c0_g1_i1	60.92	458	170	4	24	473	26	482	0	559	476	484	95	95
AT1G08470	1	0.505	evgtrinTRINITY_DN71103c0_g1_i2	71.95	385	108	0	6	390	5	389	0	594	391	390	98	98
AT1G08470	1	0.505	evgtrinTRINITY_DN71103c0_g1_i3	72.51	291	80	0	1	291	99	389	1e-159	454	292	390	99	99
AT1G08470	1	0.505	evgtrinTRINITY_DN71103c0_g3_i10	72.41	203	56	0	6	208	5	207	6e-106	315	213	390	95	95
AT1G08470	1	0.505	evgtrinTRINITY_DN71103c0_g3_i1	74.62	197	50	0	6	202	5	201	2e-105	315	267	390	74	74
AT1G08470	1	0.505	evgtrinTRINITY_DN71103c0_g3_i5	70.97	186	54	0	1	186	204	389	3e-96	288	186	390	100	100
AT1G08470	1	0.505	evgtrinTRINITY_DN71103c0_g3_i12	68.82	186	58	0	1	186	204	389	7e-93	280	186	390	100	100
AT1G08470	1	0.505	evgtrinTRINITY_DN71103c0_g3_i2	68.51	181	57	0	31	211	209	389	6e-92	278	211	390	86	86
AT4G22190	1	0.505	evgtrinTRINITY_DN62678c0_g1_i1	45.89	377	146	13	3	368	58	387	1e-68	224	368	387	99	99
AT4G22190	1	0.505	evgtrinTRINITY_DN66440c0_g1_i1	44.81	366	148	12	18	369	62	387	3e-67	221	370	387	95	95
AT1G79720	1	0.505	evgtrinTRINITY_DN64459c0_g1_i4	66.67	150	49	1	5	154	271	419	3e-64	207	155	484	97	97
AT1G79720	1	0.505	evgvelvLoc53902t1	65.69	102	34	1	1	101	85	186	3e-41	144	115	484	88	88
AT3G18640	1	0.505	evgtrinTRINITY_DN74561c0_g4_i1	40.22	276	119	5	710	980	442	676	5e-38	152	980	676	34	28
AT3G18640	1	0.505	evgvelvLoc49438d127276t1	33.45	281	146	9	168	428	417	676	4e-27	114	435	676	60	60
AT5G60150	1	0.505	evgtrinTRINITY_DN63884c0_g1_i1	73.44	64	16	1	334	397	1125	1187	8e-24	105	403	1195	16	16
AT5G60150	1	0.505	evgtrinTRINITY_DN63884c0_g1_i2	67.57	74	21	2	423	494	1115	1187	2e-23	105	500	1195	14	14
AT1G08470	1	0.505	evgtrinTRINITY_DN74173c0_g1_i12	36.54	156	72	4	2	143	247	389	1e-18	82	148	390	96	96
AT3G18640	1	0.505	evgvelvLoc33396d286411t1	33.33	216	102	6	27	239	445	621	1e-14	73.6	239	676	89	89
AT1G08470	1	0.505	evgvelvLoc165358d405460t1	35.54	121	52	3	9	115	277	385	3e-13	65.9	117	390	91	91
AT5G60150	1	0.505	evgtrinTRINITY_DN68847c0_g1_i2	42.31	78	43	2	96	171	76	153	1e-10	60.5	172	1195	44	44
AT4G30330	2	0.504	evgvelvLoc8382t2	72.88	59	7	1	42	100	1	50	3e-21	83.6	109	88	54	54
AT5G14410	2	0.504	evgtrinTRINITY_DN56024c0_g1_i2	42.27	97	43	3	36	124	18	109	7e-11	57.4	146	133	61	61
AT5G14410	2	0.504	evgtrinTRINITY_DN56024c0_g1_i1	40.21	97	45	3	36	124	18	109	2e-09	53.1	146	133	61	61
AT4G34160	1	0.504	evgtrinTRINITY_DN68014c0_g2_i1	59.58	287	108	3	1	284	1	282	3e-115	343	347	376	82	82
AT4G34160	1	0.504	evgvelvLoc25960d482200t1	54.82	166	69	3	1	164	1	162	2e-50	169	164	376	100	100
AT4G34160	1	0.504	evgtrinTRINITY_DN51961c0_g1_i1	45.83	120	50	5	1	117	3	110	6e-19	81.6	117	376	100	100
AT5G17160	1	0.504	evgtrinTRINITY_DN70781c0_g1_i7	53.85	65	26	1	1	61	1	65	7e-13	72.4	733	569	8	8
AT5G17160	1	0.504	evgtrinTRINITY_DN73655c0_g1_i3	72.73	44	12	0	1	44	1	44	1e-12	72.4	1134	569	4	4
AT5G17160	1	0.504	evgtrinTRINITY_DN73655c0_g1_i4	73.81	42	11	0	1	42	1	42	1e-12	72.4	1043	569	4	4
AT3G18035	2	0.503	evgtrinTRINITY_DN56255c0_g1_i1	61.19	67	26	0	84	150	65	131	5e-20	86.7	172	387	39	39
AT4G05190	1	0.503	evgtrinTRINITY_DN74889c2_g4_i1	57.86	515	210	3	4	518	20	527	0	598	518	777	99	99
AT4G05190	1	0.503	evgtrinTRINITY_DN74889c2_g4_i5	53.13	495	215	6	1	486	1	487	9e-170	503	486	790	100	100
AT1G43190	1	0.503	evgtrinTRINITY_DN64129c0_g5_i4	78.01	241	42	1	1	241	99	328	7e-136	394	241	430	100	100
AT1G55900	1	0.503	evgtrinTRINITY_DN66569c0_g2_i6	54.57	372	153	3	4	359	5	376	3e-135	395	359	376	99	99
AT1G55900	1	0.503	evgtrinTRINITY_DN66569c0_g2_i7	52.42	372	158	4	4	356	5	376	2e-130	382	356	376	99	99
AT1G43190	1	0.503	evgtrinTRINITY_DN73926c0_g2_i2	74.89	231	54	1	1	231	1	227	7e-125	365	238	432	97	97
AT1G43190	1	0.503	evgtrinTRINITY_DN73926c0_g2_i5utrorf	79.81	213	43	0	1	213	218	430	1e-122	358	213	430	100	100
AT1G43190	1	0.503	evgtrinTRINITY_DN73926c0_g4_i1	77.78	135	26	1	74	208	1	131	3e-70	224	208	432	65	65
AT1G43190	1	0.503	evgvelvLoc23t4	77.53	89	19	1	4	92	312	399	3e-43	150	151	432	59	59
AT3G57860	1	0.503	evgvelvLoc138750d597813t1	43.56	101	55	2	13	111	143	243	3e-19	81.3	111	243	89	89
AT5G62710	1	0.502	evgtrinTRINITY_DN71411c1_g2_i1	67.9	486	145	4	3	477	1	486	0	681	513	604	93	93
AT5G62710	1	0.502	evgtrinTRINITY_DN71411c1_g2_i13	66.35	532	141	5	3	526	1	502	0	709	526	604	99	99
AT5G62710	1	0.502	evgtrinTRINITY_DN60228c0_g1_i5	64.52	279	98	1	1	278	74	352	1e-132	391	278	570	100	100
AT3G50670	1	0.502	evgtrinTRINITY_DN63980c0_g3_i4	69.31	202	59	2	1	199	1	202	1e-100	296	251	204	79	79
AT3G50670	1	0.502	evgtrinTRINITY_DN63980c0_g2_i1	78.57	168	36	0	1	168	1	168	2e-95	279	171	204	98	98
AT5G08580	1	0.502	evgtrinTRINITY_DN75211c1_g1_i9	66.01	203	52	2	12	197	39	241	2e-94	285	197	391	94	94
AT5G08580	1	0.502	evgtrinTRINITY_DN75211c1_g1_i4	60.56	213	64	2	1	193	1	213	1e-89	272	193	391	100	100
AT5G16250	1	0.502	evgtrinTRINITY_DN53342c0_g1_i1	67.78	180	55	2	48	226	6	183	1e-76	233	226	183	79	79
AT1G53380	1	0.502	evgvelvLoc19998d273209t1	58.47	183	66	2	1	173	271	453	3e-68	218	175	453	99	99
AT3G50670	1	0.502	evgtrinTRINITY_DN72234c1_g1_i2	64	150	40	5	1	149	169	305	2e-47	168	331	427	45	45
AT3G50670	1	0.502	evgtrinTRINITY_DN72234c1_g2_i4	58.54	123	31	6	1	119	198	304	3e-26	107	299	427	40	40
AT5G08580	1	0.502	evgvelvLoc12385t3	63.93	61	22	0	13	73	262	322	1e-19	84	117	391	90	52
AT3G50670	1	0.502	evgtrinTRINITY_DN72234c1_g6_i1	60	35	14	0	1	35	143	177	9e-09	51.2	107	204	33	33
AT3G57800	5	0.501	evgtrinTRINITY_DN68140c1_g1_i7	48.45	388	159	14	1	357	1	378	6e-85	266	362	379	99	99
AT3G57800	5	0.501	evgtrinTRINITY_DN68140c1_g1_i6	53.8	303	115	9	1	283	1	298	4e-77	244	303	379	93	93
AT2G35060	3	0.501	evgtrinTRINITY_DN60847c0_g2_i1	72.22	378	92	5	1	377	427	792	0	561	377	792	100	100
AT2G35060	3	0.501	evgvelvLoc8797d97024t1	84.07	113	18	0	2	114	340	452	8e-57	189	114	792	99	99
AT5G52860	2	0.501	evgtrinTRINITY_DN67589c0_g1_i2	68.28	599	174	6	22	617	4	589	0	816	617	589	97	97
AT5G54200	2	0.501	evgvelvLoc94955t1	57.39	115	15	1	1	115	456	536	2e-35	130	115	825	100	100
AT3G56120	1	0.501	evgtrinTRINITY_DN70273c0_g1_i6	55.79	518	179	3	1	518	1	468	0	597	530	468	98	98
AT1G77470	1	0.501	evgtrinTRINITY_DN71456c1_g2_i2	75.07	369	79	4	1	357	1	368	0	554	357	369	100	100
AT3G56120	1	0.501	evgtrinTRINITY_DN70273c0_g1_i1	70.49	288	85	0	1	288	1	288	4e-151	441	402	468	72	72
AT2G24590	1	0.501	evgvelvLoc55582d308107t1	80.91	110	21	0	34	143	1	110	6e-48	157	143	196	77	77
AT2G24590	1	0.501	evgvelvLoc51561d128840t1	83.1	71	12	0	1	71	1	71	5e-38	131	155	196	46	46
AT3G52170	1	0.501	evgtrinTRINITY_DN61894c0_g1_i6	34.32	373	179	10	1	373	1	307	2e-37	145	548	499	84	68
AT1G31310	1	0.501	evgtrinTRINITY_DN67803c0_g1_i2	47.93	121	46	2	30	133	257	377	1e-24	98.2	141	383	74	74
AT1G31310	1	0.501	evgvelvLoc33239t1	30.67	75	52	0	26	100	303	377	1e-08	52.4	109	383	69	69
AT2G44740	3	0.5	evgtrinTRINITY_DN51696c0_g1_i1	73.33	195	43	3	1	189	1	192	2e-99	291	196	202	96	96
AT4G38950	3	0.5	evgtrinTRINITY_DN70475c0_g3_i5	45.19	312	135	8	303	604	547	832	4e-66	234	612	836	85	49
AT4G38950	3	0.5	evgvelvLoc153326d395754t1	89.22	102	11	0	1	102	213	314	1e-56	188	102	836	100	100
AT5G04200	1	0.5	evgtrinTRINITY_DN60748c0_g1_i1	55.21	326	125	6	2	309	3	325	9e-122	357	319	325	97	97
AT5G04200	1	0.5	evgvelvLoc23510t1	54.48	145	32	3	4	144	50	164	5e-43	147	145	325	97	97

## Sheet: Grevillea r>=0,5 ID list 
Number of homolog contigs expressed in Grevillea juniperina for each gene co-expressed with ABCE MADS-box genes in Arabidopsis thaliana
AGI-ID	Number of corresponding Grevillea j. contig	annotation of BEST_AT_r-value>= 0,5
At5g13930	86	ATCHS_CHS_TT4__Chalcone and stilbene synthase family protein
At3g42170	28	DAYSLEEPER__BED zinc finger ;hAT family dimerisation domain
At4g24130	27	Protein of unknown function, DUF538
At4g31880	25
At5g10770	19	Eukaryotic aspartyl protease family protein
At4g39330	15	ATCAD9_CAD9__cinnamyl alcohol dehydrogenase 9
At3g52870	14	IQ calmodulin-binding motif family protein
At5g23960	13	ATTPS21_TPS21__terpene synthase 21
At5g15720	12	GLIP7__GDSL-motif lipase 7
At1g68710	12	ATPase E1-E2 type family protein / haloacid dehalogenase-like hydrolase family protein
At1g22380	11	AtUGT85A3_UGT85A3__UDP-glucosyl transferase 85A3
At1g19850	11	ARF5_IAA24_MP__Transcriptional factor B3 family protein / auxin-responsive factor AUX/IAA-related
At5g07990	10	CYP75B1_D501_TT7__Cytochrome P450 superfamily protein
At1g24020	10	MLP423__MLP-like protein 423
At4g37750	10	ANT_CKC_CKC1_DRG__Integrase-type DNA-binding superfamily protein
At3g19960	10	ATM1__myosin 1
At5g53190	9	AtSWEET3_SWEET3__Nodulin MtN3 family protein
At3g15550	9
At2g37050	9	Leucine-rich repeat protein kinase family protein
At2g22420	9	Peroxidase superfamily protein
At1g08470	9	SSL3__strictosidine synthase-like 3
At3g23730	8	XTH16__xyloglucan endotransglucosylase/hydrolase 16
At2g40540	8	ATKT2_ATKUP2_KT2_KUP2_SHY3_TRK2__potassium transporter 2
At2g20300	8	ALE2__Protein kinase superfamily protein
At1g61680	7	ATTPS14_TPS14__terpene synthase 14
At5g45670	7	GDSL-like Lipase/Acylhydrolase superfamily protein
At1g30330	7	ARF6__auxin response factor 6
At3g22780	7	ATTSO1_TSO1__Tesmin/TSO1-like CXC domain-containing protein
At4g21270	7	ATK1_KATA_KATAP__kinesin 1
At3g01410	7	Polynucleotidyl transferase, ribonuclease H-like superfamily protein
At5g67360	7	ARA12__Subtilase family protein
At3g50530	7	CRK__CDPK-related kinase
At5g23530	7	AtCXE18_CXE18__carboxyesterase 18
At1g72050	7	TFIIIA__transcription factor IIIA
At3g26932	7	DRB3__dsRNA-binding protein 3
At5g57700	7	BNR/Asp-box repeat family protein
At5g20240	6	PI__K-box region and MADS-box transcription factor family protein
At1g78960	6	ATLUP2_LUP2__lupeol synthase 2
At3g55290	6	SDRd__NAD(P)-binding Rossmann-fold superfamily protein
At2g28630	6	KCS12__3-ketoacyl-CoA synthase 12
At4g10955	6	alpha/beta-Hydrolases superfamily protein
At2g05790	6	O-Glycosyl hydrolases family 17 protein
At4g13710	6	Pectin lyase-like superfamily protein
At4g16130	6	ARA1_ATISA1_ISA1__arabinose kinase
At1g76310	6	CYCB2;4__CYCLIN B2;4
At3g13690	6	Protein kinase protein with adenine nucleotide alpha hydrolases-like domain
At1g28710	6	Nucleotide-diphospho-sugar transferase family protein
At4g34980	6	SLP2__subtilisin-like serine protease 2
At1g69870	6	AtNPF2.13_NPF2.13_NRT1.7__nitrate transporter 1.7
At4g39680	6	SAP domain-containing protein
At1g02205	6	CER1_CER22__Fatty acid hydroxylase superfamily
At5g50350	6
At1g61870	6	PPR336__pentatricopeptide repeat 336
At3g23670	6	KINESIN-12B_PAKRP1L__phragmoplast-associated kinesin-related protein, putative
At4g35880	6	Eukaryotic aspartyl protease family protein
At3g13570	6	At-SCL30A_SCL30A__SC35-like splicing factor 30A
At3g15140	6	Polynucleotidyl transferase, ribonuclease H-like superfamily protein
At3g52820	6	ATPAP22_PAP22__purple acid phosphatase 22
At5g33370	5	GDSL-like Lipase/Acylhydrolase superfamily protein
At2g42200	5	AtSPL9_SPL9__squamosa promoter binding protein-like 9
At1g69420	5	DHHC-type zinc finger family protein
At3g27360	5	H3.1__Histone superfamily protein
At4g14750	5	IQD19__IQ-domain 19
At1g60060	5	Serine/threonine-protein kinase WNK (With No Lysine)-related
At3g51280	5	Tetratricopeptide repeat (TPR)-like superfamily protein
At1g74690	5	IQD31__IQ-domain 31
At5g50740	5	Heavy metal transport/detoxification superfamily protein
At1g13130	5	Cellulase (glycosyl hydrolase family 5) protein
At2g26330	5	ER_QRP1__Leucine-rich receptor-like protein kinase family protein
At4g23860	5	PHD finger protein-related
At4g22140	5	EBS__PHD finger family protein / bromo-adjacent homology (BAH) domain-containing protein
At1g76540	5	CDKB2;1__cyclin-dependent kinase B2;1
At1g30440	5	Phototropic-responsive NPH3 family protein
At1g09155	5	AtPP2-B15_PP2-B15__phloem protein 2-B15
At1g02730	5	ATCSLD5_SOS6__cellulose synthase-like D5
At1g18370	5	ATNACK1_HIK_NACK1__ATP binding microtubule motor family protein
At4g24790	5	AAA-type ATPase family protein
At5g10020	5	SIRK1__Leucine-rich receptor-like protein kinase family protein
At5g19290	5	alpha/beta-Hydrolases superfamily protein
At3g20150	5	Kinesin motor family protein
At2g27810	5	ATNAT12_NAT12__nucleobase-ascorbate transporter 12
At5g64570	5	ATBXL4_XYL4__beta-D-xylosidase 4
At4g38430	5	ATROPGEF1_ROPGEF1__rho guanyl-nucleotide exchange factor 1
At1g63690	5	ATSPPL2_SPPL2__SIGNAL PEPTIDE PEPTIDASE-LIKE 2
At1g30690	5	Sec14p-like phosphatidylinositol transfer family protein
At1g24764	5	ATMAP70-2_MAP70-2__microtubule-associated proteins 70-2
At2g39510	5	UMAMIT14__nodulin MtN21 /EamA-like transporter family protein
At1g61010	5	CPSF73-I__cleavage and polyadenylation specificity factor 73-I
At1g43190	5	PTB3__polypyrimidine tract-binding protein 3
At3g50670	5	U1-70K_U1SNRNP__U1 small nuclear ribonucleoprotein-70K
At3g02310	4	AGL4_SEP2__K-box region and MADS-box transcription factor family protein
At2g38110	4	ATGPAT6_GPAT6__glycerol-3-phosphate acyltransferase 6
At5g23940	4	DCR_EMB3009_PEL3__HXXXD-type acyl-transferase family protein
At3g20820	4	Leucine-rich repeat (LRR) family protein
At5g37020	4	ARF8_ATARF8__auxin response factor 8
At1g77610	4	EamA-like transporter family protein
At1g48480	4	RKL1__receptor-like kinase 1
At3g51895	4	AST12_SULTR3;1__sulfate transporter 3;1
At1g72250	4	Di-glucose binding protein with Kinesin motor domain
At1g16060	4	ADAP_WRI3__ARIA-interacting double AP2 domain protein
At3g51240	4	F3'H_F3H_TT6__flavanone 3-hydroxylase
At5g51560	4	Leucine-rich repeat protein kinase family protein
At5g55670	4	RNA-binding (RRM/RBD/RNP motifs) family protein
At4g20050	4	QRT3__Pectin lyase-like superfamily protein
At3g02110	4	scpl25__serine carboxypeptidase-like 25
At5g59010	4	BSK5__Protein kinase protein with tetratricopeptide repeat domain
At3g51740	4	IMK2__inflorescence meristem receptor-like kinase 2
At1g51440	4	DALL2__alpha/beta-Hydrolases superfamily protein
At5g03670	4	TRM28__
At4g24000	4	ATCSLG2_CSLG2__cellulose synthase like G2
At2g29550	4	TUB7__tubulin beta-7 chain
At3g11430	4	ATGPAT5_GPAT5__glycerol-3-phosphate acyltransferase 5
At5g67200	4	Leucine-rich repeat protein kinase family protein
At4g26590	4	ATOPT5_OPT5__oligopeptide transporter 5
At5g07180	4	ERL2__ERECTA-like 2
At1g60800	4	AtNIK3_NIK3__NSP-interacting kinase 3
At1g51510	4	Y14__RNA-binding (RRM/RBD/RNP motifs) family protein
At5g03870	4	Glutaredoxin family protein
At4g02290	4	AtGH9B13_GH9B13__glycosyl hydrolase 9B13
At3g61490	4	Pectin lyase-like superfamily protein
At1g01510	4	AN_DOQ__NAD(P)-binding Rossmann-fold superfamily protein
At5g53620	4
At3g02600	4	ATLPP3_LPP3__lipid phosphate phosphatase 3
At5g09900	4	EMB2107_MSA_RPN5A__26S proteasome regulatory subunit, putative (RPN5)
At4g39010	4	AtGH9B18_GH9B18__glycosyl hydrolase 9B18
At5g61430	4	ANAC100_ATNAC5_NAC100__NAC domain containing protein 100
At1g49480	4	RTV1__related to vernalization1 1
At3g18960	4	AP2/B3-like transcriptional factor family protein
At2g34650	4	ABR_PID__Protein kinase superfamily protein
At4g28230	4
At3g61650	4	TUBG1__gamma-tubulin
At3g13960	4	AtGRF5_GRF5__growth-regulating factor 5
At1g20180	4	Protein of unknown function (DUF677)
At5g40640	4
At5g22430	3	Pollen Ole e 1 allergen and extensin family protein
At5g40350	3	AtMYB24_MYB24__myb domain protein 24
At2g42900	3	Plant basic secretory protein (BSP) family protein
At2g27920	3	SCPL51__serine carboxypeptidase-like 51
At3g11480	3	ATBSMT1_BSMT1__S-adenosyl-L-methionine-dependent methyltransferases superfamily protein
At3g22840	3	ELIP_ELIP1__Chlorophyll A-B binding family protein
At5g08640	3	ATFLS1_FLS_FLS1__flavonol synthase 1
At4g03210	3	XTH9__xyloglucan endotransglucosylase/hydrolase 9
At4g22730	3	Leucine-rich repeat protein kinase family protein
At3g01140	3	AtMYB106_MYB106_NOK__myb domain protein 106
At1g10850	3	Leucine-rich repeat protein kinase family protein
At1g01300	3	Eukaryotic aspartyl protease family protein
At3g05470	3	Actin-binding FH2 (formin homology 2) family protein
At4g39860	3
At3g22790	3	NET1A__Kinase interacting (KIP1-like) family protein
At5g26850	3	Uncharacterized protein
At4g38660	3	Pathogenesis-related thaumatin superfamily protein
At4g18570	3	Tetratricopeptide repeat (TPR)-like superfamily protein
At4g09510	3	A/N-InvI_CINV2__cytosolic invertase 2
At1g12570	3	Glucose-methanol-choline (GMC) oxidoreductase family protein
At1g49430	3	LACS2_LRD2__long-chain acyl-CoA synthetase 2
At4g35020	3	ARAC3_ATROP6_RAC3_RHO1PS_ROP6__RAC-like 3
At5g62390	3	ATBAG7_BAG7__BCL-2-associated athanogene 7
At1g23010	3	LPR1__Cupredoxin superfamily protein
At1g75290	3	NAD(P)-binding Rossmann-fold superfamily protein
At4g09460	3	AtMYB6_MYB6__myb domain protein 6
At4g04890	3	PDF2__protodermal factor 2
At5g50610	3
At1g78170	3
At2g26440	3	PME12__Plant invertase/pectin methylesterase inhibitor superfamily
At3g13560	3	O-Glycosyl hydrolases family 17 protein
At3g13510	3	Protein of Unknown Function (DUF239)
At2g35340	3	MEE29__helicase domain-containing protein
At4g21620	3	glycine-rich protein
At4g14930	3	Survival protein SurE-like phosphatase/nucleotidase
At3g63130	3	ATRANGAP1_RANGAP1__RAN GTPase activating protein 1
At2g21300	3	ATP binding microtubule motor family protein
At4g00430	3	PIP1;4_PIP1E_TMP-C__plasma membrane intrinsic protein 1;4
At5g07280	3	EMS1_EXS__Leucine-rich repeat transmembrane protein kinase
At5g23910	3	ATP binding microtubule motor family protein
At1g32190	3	alpha/beta-Hydrolases superfamily protein
At2g47900	3	AtTLP3_TLP3__tubby like protein 3
At5g20830	3	ASUS1_SUS1_atsus1__sucrose synthase 1
At5g54670	3	ATK3_KATC__kinesin 3
At3g17680	3	Kinase interacting (KIP1-like) family protein
At3g10010	3	DML2__demeter-like 2
At5g63110	3	ATHDA6_AXE1_HDA6_RPD3B_RTS1_SIL1__histone deacetylase 6
At2g47470	3	ATPDI11_ATPDIL2-1_MEE30_PDI11_UNE5__thioredoxin family protein
At3g43610	3	Spc97 / Spc98 family of spindle pole body (SBP) component
At4g00900	3	ATECA2_ECA2__ER-type Ca2+-ATPase 2
At4g14720	3	PPD2_TIFY4B__TIFY domain/Divergent CCT motif family protein
At4g17000	3
At2g35530	3	AtbZIP16_bZIP16__basic region/leucine zipper transcription factor 16
At3g48670	3	IDN2_RDM12__XH/XS domain-containing protein
At3g58560	3	DNAse I-like superfamily protein
At1g79720	3	Eukaryotic aspartyl protease family protein
At3g18640	3	Zinc finger C-x8-C-x5-C-x3-H type family protein
At5g60150	3
At4g34160	3	CYCD3_CYCD3;1__CYCLIN D3;1
At5g17160	3
At5g08580	3	Calcium-binding EF hand family protein
At5g62710	3	Leucine-rich repeat protein kinase family protein
At1g24260	2	AGL9_SEP3__K-box region and MADS-box transcription factor family protein
At1g59640	2	BPE_BPEp_BPEub_ZCW32__BIG PETAL P
At4g09960	2	AGL11_STK__K-box region and MADS-box transcription factor family protein
At2g19170	2	SLP3__subtilisin-like serine protease 3
At2g28470	2	BGAL8__beta-galactosidase 8
At1g21460	2	AtSWEET1_SWEET1__Nodulin MtN3 family protein
At5g45960	2	GDSL-like Lipase/Acylhydrolase superfamily protein
At4g30130	2	Protein of unknown function (DUF630 and DUF632)
At2g45650	2	AGL6_RSB1__AGAMOUS-like 6
At4g24670	2	TAR2__tryptophan aminotransferase related 2
At3g56370	2	Leucine-rich repeat protein kinase family protein
At3g60160	2	ABCC9_ATMRP9_MRP9__multidrug resistance-associated protein 9
At2g17880	2	DJC24__Chaperone DnaJ-domain superfamily protein
At1g72970	2	EDA17_HTH__Glucose-methanol-choline (GMC) oxidoreductase family protein
At4g16447	2
At1g51460	2	ABCG13__ABC-2 type transporter family protein
At2g40610	2	ATEXP8_ATEXPA8_ATHEXP ALPHA 1.11_EXP8_EXPA8__expansin A8
At2g46420	2	Plant protein 1589 of unknown function
At2g36490	2	AtROS1_DML1_ROS1__demeter-like 1
At4g22200	2	AKT2_AKT2/3_AKT3_KT2/3__potassium transport 2/3
At5g22500	2	FAR1__fatty acid reductase 1
At3g14240	2	Subtilase family protein
At5g43020	2	Leucine-rich repeat protein kinase family protein
At3g28050	2	UMAMIT41__nodulin MtN21 /EamA-like transporter family protein
At1g25330	2	CES_HAF__basic helix-loop-helix (bHLH) DNA-binding superfamily protein
At1g47740	2	PPPDE putative thiol peptidase family protein
At4g33260	2	AtCDC20.2_CDC20.2__Transducin family protein / WD-40 repeat family protein
At1g61170	2
At1g79060	2
At3g06840	2
At3g17840	2	RLK902__receptor-like kinase 902
At3g15095	2	HCF243__
At5g23420	2	HMGB6__high-mobility group box 6
At1g11190	2	BFN1_ENDO1__bifunctional nuclease i
At3g61830	2	ARF18__auxin response factor 18
At3g19620	2	Glycosyl hydrolase family protein
At1g01370	2	CENH3_HTR12__Histone superfamily protein
At1g52310	2	protein kinase family protein / C-type lectin domain-containing protein
At2g42840	2	PDF1__protodermal factor 1
At5g05670	2	signal recognition particle binding
At1g71830	2	ATSERK1_SERK1__somatic embryogenesis receptor-like kinase 1
At2g37630	2	AS1_ATMYB91_ATPHAN_MYB91__myb-like HTH transcriptional regulator family protein
At2g02170	2	Remorin family protein
At5g66330	2	Leucine-rich repeat (LRR) family protein
At4g14200	2	Pentatricopeptide repeat (PPR) superfamily protein
At2g16270	2
At5g63950	2	CHR24__chromatin remodeling 24
At1g45190	2	DD18__downregulated in DIF1 18
At4g25700	2	B1_BCH1_BETA-OHASE 1_chy1__beta-hydroxylase 1
At5g04770	2	ATCAT6_CAT6__cationic amino acid transporter 6
At1g14840	2	ATMAP70-4_MAP70-4__microtubule-associated proteins 70-4
At2g22610	2	Di-glucose binding protein with Kinesin motor domain
At1g78570	2	ATRHM1_RHM1_ROL1__rhamnose biosynthesis 1
At5g44620	2	CYP706A3__cytochrome P450, family 706, subfamily A, polypeptide 3
At1g21810	2	Plant protein of unknown function (DUF869)
At4g15140	2
At3g15540	2	IAA19_MSG2__indole-3-acetic acid inducible 19
At5g35910	2	Polynucleotidyl transferase, ribonuclease H fold protein with HRDC domain
At1g04520	2	PDLP2__plasmodesmata-located protein 2
At3g20180	2	Copper transport protein family
At5g54400	2	S-adenosyl-L-methionine-dependent methyltransferases superfamily protein
At3g61610	2	Galactose mutarotase-like superfamily protein
At3g06030	2	ANP3_AtANP3_MAPKKK12_NP3__NPK1-related protein kinase 3
At3g61550	2	RING/U-box superfamily protein
At1g30080	2	Glycosyl hydrolase superfamily protein
At2g32530	2	ATCSLB03_ATCSLB3_CSLB03__cellulose synthase-like B3
At2g45560	2	CYP76C1__cytochrome P450, family 76, subfamily C, polypeptide 1
At1g65060	2	4CL3__4-coumarate:CoA ligase 3
At1g44970	2	Peroxidase superfamily protein
At1g66540	2	Cytochrome P450 superfamily protein
At3g17360	2	POK1__phragmoplast orienting kinesin 1
At5g53770	2	Nucleotidyltransferase family protein
At4g35550	2	ATWOX13_HB-4_WOX13__WUSCHEL related homeobox 13
At5g05270	2	AtCHIL_CHIL__Chalcone-flavanone isomerase family protein
At3g53190	2	Pectin lyase-like superfamily protein
At5g67100	2	ICU2__DNA-directed DNA polymerases
At1g11600	2	CYP77B1__cytochrome P450, family 77, subfamily B, polypeptide 1
At3g25040	2	ERD2B__endoplasmic reticulum retention defective 2B
At1g56020	2
At1g01110	2	IQD18__IQ-domain 18
At5g47710	2	Calcium-dependent lipid-binding (CaLB domain) family protein
At1g11820	2	O-Glycosyl hydrolases family 17 protein
At5g41970	2	Metal-dependent protein hydrolase
At2g01820	2	Leucine-rich repeat protein kinase family protein
At2g22670	2	IAA8__indoleacetic acid-induced protein 8
At3g62840	2	Small nuclear ribonucleoprotein family protein
At4g37210	2	Tetratricopeptide repeat (TPR)-like superfamily protein
At1g34355	2	ATPS1_PS1__forkhead-associated (FHA) domain-containing protein
At5g13980	2	Glycosyl hydrolase family 38 protein
At1g52500	2	ATFPG-1_ATFPG-2_ATMMH-1_ATMMH-2_FPG-1_FPG-2_MMH_MMH-1_MMH-2__MUTM homolog-1
At5g15210	2	ATHB30_HB30_ZFHD3_ZHD8__homeobox protein 30
At4g29680	2	Alkaline-phosphatase-like family protein
At1g21700	2	ATSWI3C_CHB4_SWI3C__SWITCH/sucrose nonfermenting 3C
At2g29890	2	ATVLN1_VLN1__villin-like 1
At3g02210	2	COBL1__COBRA-like protein 1 precursor
At5g42760	2	Leucine carboxyl methyltransferase
At1g21560	2
At3g19120	2	PIF / Ping-Pong family of plant transposases
At5g13400	2	Major facilitator superfamily protein
At1g78430	2	RIP4__ROP interactive partner 2
At4g25550	2	Cleavage/polyadenylation specificity factor, 25kDa subunit
At3g25810	2	Terpenoid cyclases/Protein prenyltransferases superfamily protein
At1g57820	2	ORTH2_VIM1__Zinc finger (C3HC4-type RING finger) family protein
At4g22190	2
At5g14410	2
At1g55900	2	EMB1860_TIM50__Haloacid dehalogenase-like hydrolase (HAD) superfamily protein
At4g05190	2	ATK5__kinesin 5
At3g57800	2	basic helix-loop-helix (bHLH) DNA-binding superfamily protein
At2g35060	2	KUP11__K+ uptake permease 11
At1g31310	2	hydroxyproline-rich glycoprotein family protein
At2g24590	2	At-RSZ22a_RSZ22a__RNA recognition motif and CCHC-type zinc finger domains containing protein
At3g56120	2	S-adenosyl-L-methionine-dependent methyltransferases superfamily protein
At4g38950	2	ATP binding microtubule motor family protein
At5g04200	2	AtMC9_AtMCP2f_MC9_MCP2f__metacaspase 9
At4g18960	1	AG__K-box region and MADS-box transcription factor family protein
At1g69120	1	AGL7_AP1_AtAP1__K-box region and MADS-box transcription factor family protein
At1g02190	1	Fatty acid hydroxylase superfamily
At3g03450	1	RGL2__RGA-like 2
At1g05490	1	chr31__chromatin remodeling 31
At5g02190	1	ATASP38_EMB24_PCS1__Eukaryotic aspartyl protease family protein
At3g01980	1	NAD(P)-binding Rossmann-fold superfamily protein
At5g59120	1	ATSBT4.13_SBT4.13__subtilase 4.13
At5g35670	1	iqd33__IQ-domain 33
At2g20870	1	cell wall protein precursor, putative
At1g75090	1	DNA glycosylase superfamily protein
At5g18000	1	VDD__VERDANDI
At4g15440	1	CYP74B2_HPL1__hydroperoxide lyase 1
At5g20740	1	Plant invertase/pectin methylesterase inhibitor superfamily protein
At2g24210	1	TPS10__terpene synthase 10
At1g24540	1	CYP86C1__cytochrome P450, family 86, subfamily C, polypeptide 1
At5g21150	1	AGO9__Argonaute family protein
At5g15310	1	ATMIXTA_ATMYB16_MYB16__myb domain protein 16
At2g42990	1	GDSL-like Lipase/Acylhydrolase superfamily protein
At5g11550	1	ARM repeat superfamily protein
At1g64450	1	Glycine-rich protein family
At3g53130	1	CYP97C1_LUT1__Cytochrome P450 superfamily protein
At1g14440	1	AtHB31_FTM2_HB31_ZHD4__homeobox protein 31
At2g33810	1	SPL3__squamosa promoter binding protein-like 3
At1g13280	1	AOC4__allene oxide cyclase 4
At2g42800	1	AtRLP29_RLP29__receptor like protein 29
At1g14900	1	HMGA__high mobility group A
At3g58780	1	AGL1_SHP1__K-box region and MADS-box transcription factor family protein
At1g02800	1	ATCEL2_CEL2__cellulase 2
At1g75240	1	AtHB33_HB33_ZHD5__homeobox protein 33
At5g63140	1	ATPAP29_PAP29__purple acid phosphatase 29
At2g23800	1	GGPS2_GGPS5__geranylgeranyl pyrophosphate synthase 2
At4g15210	1	AT-BETA-AMY_ATBETA-AMY_BAM5_BMY1_RAM1__beta-amylase 5
At3g18850	1	LPAT5__lysophosphatidyl acyltransferase 5
At5g28640	1	AN3_ATGIF1_GIF_GIF1__SSXT family protein
At3g59420	1	ACR4_CR4__crinkly4
At5g49130	1	MATE efflux family protein
At5g67070	1	RALFL34__ralf-like 34
At1g75880	1	SGNH hydrolase-type esterase superfamily protein
At3g23890	1	ATTOPII_TOPII__topoisomerase II
At2g07690	1	MCM5__Minichromosome maintenance (MCM2/3/5) family protein
At5g52390	1	PAR1 protein
At1g54570	1	PES1__Esterase/lipase/thioesterase family protein
At4g28310	1
At5g50790	1	AtSWEET10_SWEET10__Nodulin MtN3 family protein
At1g66120	1	AAE11_AtAAE11__AMP-dependent synthetase and ligase family protein
At2g04570	1	GDSL-like Lipase/Acylhydrolase superfamily protein
At5g16440	1	IPP1__isopentenyl diphosphate isomerase 1
At1g68560	1	ATXYL1_AXY3_TRG1_XYL1__alpha-xylosidase 1
At5g44560	1	VPS2.2__SNF7 family protein
At1g77870	1	MUB5__membrane-anchored ubiquitin-fold protein 5 precursor
At1g25510	1	Eukaryotic aspartyl protease family protein
At1g01600	1	CYP86A4__cytochrome P450, family 86, subfamily A, polypeptide 4
At1g31650	1	ATROPGEF14_ROPGEF14__RHO guanyl-nucleotide exchange factor 14
At3g08680	1	Leucine-rich repeat protein kinase family protein
At1g14180	1	RING/U-box superfamily protein
At4g04020	1	FIB_PGL35__fibrillin
At5g66590	1	CAP (Cysteine-rich secretory proteins, Antigen 5, and Pathogenesis-related 1 protein) superfamily protein
At3g45940	1	Glycosyl hydrolases family 31 protein
At5g08260	1	scpl35__serine carboxypeptidase-like 35
At1g15360	1	AtSHN1_SHN1_WIN1__Integrase-type DNA-binding superfamily protein
At4g32710	1	PERK14__Protein kinase superfamily protein
At5g51810	1	AT2353_ATGA20OX2_GA20OX2__gibberellin 20 oxidase 2
At3g44610	1	Protein kinase superfamily protein
At4g21630	1	Subtilase family protein
At4g15790	1
At3g57830	1	Leucine-rich repeat protein kinase family protein
At5g48500	1
At2g03070	1	MED8__mediator subunit 8
At1g07790	1	HTB1__Histone superfamily protein
At5g56220	1	P-loop containing nucleoside triphosphate hydrolases superfamily protein
At1g44780	1
At1g67040	1	TRM22__
At3g26125	1	CYP86C2__cytochrome P450, family 86, subfamily C, polypeptide 2
At4g34400	1	AP2/B3-like transcriptional factor family protein
At5g51750	1	ATSBT1.3_SBT1.3__subtilase 1.3
At3g11000	1	DCD (Development and Cell Death) domain protein
At1g08560	1	ATSYP111_KN_SYP111__syntaxin of plants 111
At4g15480	1	UGT84A1__UDP-Glycosyltransferase superfamily protein
At5g27740	1	EMB161_EMB251_EMB2775_RFC3__ATPase family associated with various cellular activities (AAA)
At1g44900	1	ATMCM2_MCM2__minichromosome maintenance (MCM2/3/5) family protein
At3g25980	1	AtMAD2_MAD2__DNA-binding HORMA family protein
At1g26780	1	AtMYB117_LOF1_MYB117__myb domain protein 117
At5g19730	1	Pectin lyase-like superfamily protein
At3g51290	1	APSR1__Protein of unknown function (DUF630) ;Protein of unknown function (DUF632)
At1g78650	1	POLD3__DNA-directed DNA polymerases
At3g22910	1	ACA13__ATPase E1-E2 type family protein / haloacid dehalogenase-like hydrolase family protein
At1g16780	1	AtVHP2;2_VHP2;2__Inorganic H pyrophosphatase family protein
At5g17010	1	Major facilitator superfamily protein
At2g47270	1	UPB1__sequence-specific DNA binding transcription factors;transcription regulators
At5g52280	1	Myosin heavy chain-related protein
At1g59540	1	ZCF125__P-loop containing nucleoside triphosphate hydrolases superfamily protein
At5g38690	1	Zinc-finger domain of monoamine-oxidase A repressor R1 protein
At1g20120	1	GDSL-like Lipase/Acylhydrolase superfamily protein
At4g02060	1	MCM7_PRL__Minichromosome maintenance (MCM2/3/5) family protein
At4g33400	1	Vacuolar import/degradation, Vid27-related protein
At3g18210	1	2-oxoglutarate (2OG) and Fe(II)-dependent oxygenase superfamily protein
At1g20330	1	CVP1_FRL1_SMT2__sterol methyltransferase 2
At2g02540	1	ATHB21_HB21_ZFHD4_ZHD3__homeobox protein 21
At4g36180	1	Leucine-rich receptor-like protein kinase family protein
At5g01890	1	PXC2__Leucine-rich receptor-like protein kinase family protein
At5g67270	1	ATEB1C_ATEB1H1_EB1C__end binding protein 1C
At3g59530	1	LAP3__Calcium-dependent phosphotriesterase superfamily protein
At3g52110	1
At3g54560	1	HTA11__histone H2A 11
At1g60890	1	Phosphatidylinositol-4-phosphate 5-kinase family protein
At3g53760	1	ATGCP4_GCP4__GAMMA-TUBULIN COMPLEX PROTEIN 4
At5g55820	1	WYR__
At1g78680	1	ATGGH2_GGH2__gamma-glutamyl hydrolase 2
At5g02530	1	RNA-binding (RRM/RBD/RNP motifs) family protein
At3g58650	1	TRM7__
At1g18650	1	PDCB3__plasmodesmata callose-binding protein 3
At3g14560	1
At3g55120	1	A11_AtCHI_CFI_CHI_TT5__Chalcone-flavanone isomerase family protein
At2g29210	1	splicing factor PWI domain-containing protein
At1g09150	1	pseudouridine synthase and archaeosine transglycosylase (PUA) domain-containing protein
At3g29280	1
At2g44770	1	ELMO/CED-12 family protein
At1g69770	1	CMT3__chromomethylase 3
At5g42100	1	ATBG_PPAP_BG_PPAP__beta-1,3-glucanase_putative
At5g46280	1	MCM3__Minichromosome maintenance (MCM2/3/5) family protein
At3g12710	1	DNA glycosylase superfamily protein
At1g58360	1	AAP1_AtAAP1_NAT2__amino acid permease 1
At1g71850	1	Ubiquitin carboxyl-terminal hydrolase family protein
At5g51660	1	ATCPSF160_CPSF160__cleavage and polyadenylation specificity factor 160
At1g78770	1	APC6__anaphase promoting complex 6
At3g25150	1	Nuclear transport factor 2 (NTF2) family protein with RNA binding (RRM-RBD-RNP motifs) domain
At3g61250	1	AtMYB17_LMI2_MYB17__myb domain protein 17
At3g19590	1	BUB3.1__Transducin/WD40 repeat-like superfamily protein
At4g30610	1	BRS1_SCPL24__alpha/beta-Hydrolases superfamily protein
At5g23260	1	ABS_AGL32_TT16__K-box region and MADS-box transcription factor family protein
At2g33560	1	BUBR1__BUB1-related (BUB1: budding uninhibited by benzymidazol 1)
At5g65410	1	ATHB25_HB25_ZFHD2_ZHD1__homeobox protein 25
At1g03780	1	AtTPX2_TPX2__targeting protein for XKLP2
At2g16440	1	MCM4__Minichromosome maintenance (MCM2/3/5) family protein
At3g02820	1	zinc knuckle (CCHC-type) family protein
At4g15620	1	Uncharacterised protein family (UPF0497)
At1g18450	1	ARP4_ATARP4__actin-related protein 4
At3g47600	1	ATMYB94_ATMYBCP70_MYB94__myb domain protein 94
At4g28220	1	NDB1__NAD(P)H dehydrogenase B1
At5g38330	1	LCR80__low-molecular-weight cysteine-rich 80
At4g24050	1	NAD(P)-binding Rossmann-fold superfamily protein
At5g43600	1	ATAAH-2_UAH__ureidoglycolate amidohydrolase
At2g25100	1	Polynucleotidyl transferase, ribonuclease H-like superfamily protein
At3g49080	1	Ribosomal protein S5 domain 2-like superfamily protein
At1g47970	1
At3g17350	1
At1g74300	1	alpha/beta-Hydrolases superfamily protein
At3g63090	1	Ubiquitin carboxyl-terminal hydrolase family protein
At5g67260	1	CYCD3;2__CYCLIN D3;2
At1g06990	1	GDSL-like Lipase/Acylhydrolase superfamily protein
At4g24940	1	AT-SAE1-1_ATSAE1A_SAE1A__SUMO-activating enzyme 1A
At4g23440	1	Disease resistance protein (TIR-NBS class)
At5g48600	1	ATCAP-C_ATSMC3_ATSMC4_SMC3__structural maintenance of chromosome 3
At1g76240	1	Arabidopsis protein of unknown function (DUF241)
At1g71260	1	ATWHY2_WHY2__WHIRLY 2
At2g47620	1	ATSWI3A_CHB1_SWI3A__SWITCH/sucrose nonfermenting 3A
At3g19550	1
At1g13790	1	FDM4__XH/XS domain-containing protein
At1g67630	1	EMB2814_POLA2__DNA polymerase alpha 2
At4g00990	1	Transcription factor jumonji (jmjC) domain-containing protein
At5g65860	1	ankyrin repeat family protein
At2g44150	1	ASHH3_SDG7__histone-lysine N-methyltransferase ASHH3
At1g29980	1	Protein of unknown function, DUF642
At2g16780	1	MSI02_MSI2_NFC02_NFC2__Transducin family protein / WD-40 repeat family protein
At2g28790	1	Pathogenesis-related thaumatin superfamily protein
At5g04280	1	AtRZ-1c_RZ-1c__RNA-binding (RRM/RBD/RNP motifs) family protein with retrovirus zinc finger-like domain
At1g01630	1	Sec14p-like phosphatidylinositol transfer family protein
At4g30330	1	Small nuclear ribonucleoprotein family protein
At3g18035	1	HON4__winged-helix DNA-binding transcription factor family protein
At3g57860	1	GIG1_OSD1_UVI4-LIKE__UV-B-insensitive 4-like
At1g53380	1	Plant protein of unknown function (DUF641)
At5g16250	1
At5g52860	1	ABCG8__ABC-2 type transporter family protein
At5g54200	1	Transducin/WD40 repeat-like superfamily protein
At1g77470	1	EMB2810_RFC3_RFC5__replication factor C subunit 3
At3g52170	1	DNA binding
At2g44740	1	CYCP4;1__cyclin p4;1
At3g54340	0	AP3_ATAP3__K-box region and MADS-box transcription factor family protein
At5g15800	0	AGL2_SEP1__K-box region and MADS-box transcription factor family protein
At4g01080	0	TBL26__TRICHOME BIREFRINGENCE-LIKE 26
At3g10570	0	CYP77A6__cytochrome P450, family 77, subfamily A, polypeptide 6
At1g16705	0	p300/CBP acetyltransferase-related protein-related
At3g04960	0	Domain of unknown function (DUF3444)
At1g66350	0	RGL_RGL1__RGA-like 1
At4g21590	0	ENDO3__endonuclease 3
At1g27360	0	SPL11__squamosa promoter-like 11
At4g14695	0	Uncharacterised protein family (UPF0041)
At3g28500	0	60S acidic ribosomal protein family
At5g48880	0	KAT5_PKT1_PKT2__peroxisomal 3-keto-acyl-CoA thiolase 2
At1g35170	0	TRAM, LAG1 and CLN8 (TLC) lipid-sensing domain containing protein
At2g42830	0	AGL5_SHP2__K-box region and MADS-box transcription factor family protein
At1g72260	0	THI2.1_THI2.1.1__thionin 2.1
At1g58430	0	RXF26__GDSL-like Lipase/Acylhydrolase family protein
At4g16590	0	ATCSLA01_ATCSLA1_CSLA01__cellulose synthase-like A01
At5g23970	0	HXXXD-type acyl-transferase family protein
At5g42230	0	scpl41__serine carboxypeptidase-like 41
At4g19430	0
At1g75300	0	NmrA-like negative transcriptional regulator family protein
At5g60140	0	AP2/B3-like transcriptional factor family protein
At4g12410	0	SAUR35__SAUR-like auxin-responsive protein family
At3g14395	0
At4g12960	0	AtGILT_GILT__Gamma interferon responsive lysosomal thiol (GILT) reductase family protein
At4g13790	0	SAUR25__SAUR-like auxin-responsive protein family
At4g32460	0	Protein of unknown function, DUF642
At4g20320	0	CTP synthase family protein
At3g46770	0	AP2/B3-like transcriptional factor family protein
At4g12890	0	Gamma interferon responsive lysosomal thiol (GILT) reductase family protein
At4g00870	0	basic helix-loop-helix (bHLH) DNA-binding superfamily protein
At3g15270	0	SPL5__squamosa promoter binding protein-like 5
At1g24070	0	ATCSLA10_CSLA10__cellulose synthase-like A10
At3g06220	0	AP2/B3-like transcriptional factor family protein
At1g70720	0	Plant invertase/pectin methylesterase inhibitor superfamily protein
At5g09730	0	ATBX3_ATBXL3_BX3_BXL3_XYL3__beta-xylosidase 3
At1g55260	0	LTPG6__Bifunctional inhibitor/lipid-transfer protein/seed storage 2S albumin superfamily protein
At1g12080	0	Vacuolar calcium-binding protein-related
At1g15260	0
At2g22960	0	alpha/beta-Hydrolases superfamily protein
At4g29030	0	Putative membrane lipoprotein
At1g35310	0	MLP168__MLP-like protein 168
At4g23680	0	Polyketide cyclase/dehydrase and lipid transport superfamily protein
At3g27810	0	ATMYB21_ATMYB3_MYB21__myb domain protein 21
At4g21480	0	STP12__sugar transporter protein 12
At1g27370	0	SPL10__squamosa promoter binding protein-like 10
At1g23060	0	MDP40__
At2g45580	0	CYP76C3__cytochrome P450, family 76, subfamily C, polypeptide 3
At1g72290	0	Kunitz family trypsin and protease inhibitor protein
At5g45950	0	GDSL-like Lipase/Acylhydrolase superfamily protein
At5g24580	0	Heavy metal transport/detoxification superfamily protein
At3g57920	0	SPL15__squamosa promoter binding protein-like 15
At3g28007	0	AtSWEET4_SWEET4__Nodulin MtN3 family protein
At3g61310	0	AHL11__AT hook motif DNA-binding family protein
At3g20520	0	GDPDL5_SVL3__SHV3-like 3
At1g63710	0	CYP86A7__cytochrome P450, family 86, subfamily A, polypeptide 7
At2g32765	0	ATSUMO5_SUM5_SUMO5__small ubiquitinrelated modifier 5
At5g08000	0	E13L3_PDCB2__glucan endo-1,3-beta-glucosidase-like protein 3
At5g24420	0	PGL5__6-phosphogluconolactonase 5
At5g48900	0	Pectin lyase-like superfamily protein
At5g39220	0	alpha/beta-Hydrolases superfamily protein
At3g02640	0
At3g55870	0	ADC synthase superfamily protein
At5g55720	0	Pectin lyase-like superfamily protein
At2g01610	0	Plant invertase/pectin methylesterase inhibitor superfamily protein
At3g08770	0	LTP6__lipid transfer protein 6
At1g30795	0	Glycine-rich protein family
At5g07510	0	ATGRP-4_ATGRP14_GRP-4_GRP14__glycine-rich protein 14
At5g07530	0	ATGRP-7_ATGRP17_GRP17__glycine rich protein 17
At1g61110	0	NAC025_anac025__NAC domain containing protein 25
At5g47600	0	HSP20-like chaperones superfamily protein
At3g26140	0	Cellulase (glycosyl hydrolase family 5) protein
At3g50280	0	HXXXD-type acyl-transferase family protein
At1g75930	0	EXL6__extracellular lipase 6
At5g07520	0	ATGRP-8_ATGRP18_GRP18__glycine-rich protein 18
At3g06160	0	AP2/B3-like transcriptional factor family protein
At3g06450	0	HCO3- transporter family
At5g12270	0	2-oxoglutarate (2OG) and Fe(II)-dependent oxygenase superfamily protein
At2g28950	0	ATEXP6_ATEXPA6_ATHEXP ALPHA 1.8_EXPA6__expansin A6
At3g05400	0	Major facilitator superfamily protein
At2g12480	0	SCPL43__serine carboxypeptidase-like 43
At1g06000	0	UDP-Glycosyltransferase superfamily protein
At5g07550	0	ATGRP19_GRP19__glycine-rich protein 19
At5g61605	0
At1g23570	0	Domain of unknown function (DUF220)
At4g29360	0	O-Glycosyl hydrolases family 17 protein
At3g52810	0	ATPAP21_PAP21__purple acid phosphatase 21
At4g31360	0	selenium binding
At5g07560	0	ATGRP20_GRP20__glycine-rich protein 20
At5g21100	0	Plant L-ascorbate oxidase
At1g23240	0	Caleosin-related family protein
At1g06420	0
At2g34870	0	MEE26__hydroxyproline-rich glycoprotein family protein
At1g52030	0	F-ATMBP_MBP1.2_MBP2__myrosinase-binding protein 2
At3g45610	0	DOF6__Dof-type zinc finger DNA-binding family protein
At5g07540	0	ATGRP-6_ATGRP16_GRP16__glycine-rich protein 16
At5g19090	0	Heavy metal transport/detoxification superfamily protein
At1g02470	0	Polyketide cyclase/dehydrase and lipid transport superfamily protein
At3g50070	0	CYCD3;3__CYCLIN D3;3
At3g15400	0	ATA20__anther 20
254282_at	0
At1g66850	0	Bifunctional inhibitor/lipid-transfer protein/seed storage 2S albumin superfamily protein
At1g01130	0
At1g28430	0	CYP705A24__cytochrome P450, family 705, subfamily A, polypeptide 24
At1g23590	0	Domain of unknown function DUF220
At1g28375	0
At1g10640	0	Pectin lyase-like superfamily protein
At3g53300	0	CYP71B31__cytochrome P450, family 71, subfamily B, polypeptide 31
At5g61130	0	AtPDCB1_PDCB1__plasmodesmata callose-binding protein 1
At5g17760	0	P-loop containing nucleoside triphosphate hydrolases superfamily protein
At5g62210	0	Embryo-specific protein 3, (ATS3)
At5g49330	0	ATMYB111_MYB111_PFG3__myb domain protein 111
At5g16190	0	ATCSLA11_CSLA11__cellulose synthase like A11
At4g36770	0	UDP-Glycosyltransferase superfamily protein
At1g75580	0	SAUR51__SAUR-like auxin-responsive protein family
At1g03170	0	FAF2_FTM5__Protein of unknown function (DUF3049)
At3g21310	0	Core-2/I-branching beta-1,6-N-acetylglucosaminyltransferase family protein
At5g67110	0	ALC__basic helix-loop-helix (bHLH) DNA-binding superfamily protein
At4g16140	0	proline-rich family protein
At5g03390	0	Protein of unknown function (DUF295)
At1g67830	0	ATFXG1_FXG1__alpha-fucosidase 1
At1g77630	0	LYM3_LYP3__Peptidoglycan-binding LysM domain-containing protein
At4g28440	0	Nucleic acid-binding, OB-fold-like protein
At2g42300	0	basic helix-loop-helix (bHLH) DNA-binding superfamily protein
At1g02340	0	FBI1_HFR1_REP1_RSF1__basic helix-loop-helix (bHLH) DNA-binding superfamily protein
At4g25010	0	AtSWEET14_SWEET14__Nodulin MtN3 family protein
At4g39480	0	CYP96A9__cytochrome P450, family 96, subfamily A, polypeptide 9
At1g48610	0	AT hook motif-containing protein
At4g21903	0	MATE efflux family protein
At1g11850	0
At4g23800	0	3xHMG-box2__HMG (high mobility group) box protein
At3g10320	0	Glycosyltransferase family 61 protein
At3g22420	0	ATWNK2_WNK2_ZIK3__with no lysine (K) kinase 2
At5g38130	0	HXXXD-type acyl-transferase family protein
At3g04290	0	ATLTL1_LTL1__Li-tolerant lipase 1
At2g23180	0	CYP96A1__cytochrome P450, family 96, subfamily A, polypeptide 1
At5g22880	0	H2B_HTB2__histone B2
At2g17845	0	NAD(P)-binding Rossmann-fold superfamily protein
At2g26400	0	ARD_ARD3_ATARD3__acireductone dioxygenase 3
At1g51170	0	AGC2-3_UCN__Protein kinase superfamily protein
At5g50335	0
At4g16360	0	KIN&#946;2__5'-AMP-activated protein kinase beta-2 subunit protein
At1g68400	0	leucine-rich repeat transmembrane protein kinase family protein
At2g06200	0	AtGRF6_GRF6__growth-regulating factor 6
At1g23610	0
At5g10400	0	H3.1__Histone superfamily protein
At5g58782	0	AtcPT6_cPT6__Undecaprenyl pyrophosphate synthetase family protein
At1g29490	0	SAUR68__SAUR-like auxin-responsive protein family
At1g30350	0	Pectin lyase-like superfamily protein
At4g34588	0	CPuORF2__conserved peptide upstream open reading frame 2
At4g00820	0	iqd17__IQ-domain 17
At2g18230	0	AtPPa2_PPa2__pyrophosphorylase 2
At1g72670	0	iqd8__IQ-domain 8
At1g23670	0	Domain of unknown function (DUF220)
At1g75640	0	Leucine-rich receptor-like protein kinase family protein
At4g17480	0	alpha/beta-Hydrolases superfamily protein
At5g25475	0	AP2/B3-like transcriptional factor family protein
At3g07540	0	Actin-binding FH2 (formin homology 2) family protein
At1g19830	0	SAUR54__SAUR-like auxin-responsive protein family
At3g50890	0	AtHB28_HB28_ZHD7__homeobox protein 28
At1g23520	0	Domain of unknown function (DUF220)
At3g55110	0	ABCG18__ABC-2 type transporter family protein
At2g24630	0	ATCSLC08_ATCSLC8_CSLC08__Glycosyl transferase family 2 protein
At3g56100	0	IMK3_MRLK__meristematic receptor-like kinase
265693_at	0
At1g13710	0	CYP78A5_KLU__cytochrome P450, family 78, subfamily A, polypeptide 5
At1g53160	0	FTM6_SPL4__squamosa promoter binding protein-like 4
At1g22015	0	DD46__Galactosyltransferase family protein
At5g48485	0	DIR1__Bifunctional inhibitor/lipid-transfer protein/seed storage 2S albumin superfamily protein
At3g49900	0	Phototropic-responsive NPH3 family protein
At5g56490	0	AtGulLO4_GulLO4__D-arabinono-1,4-lactone oxidase family protein
At5g53200	0	TRY__Homeodomain-like superfamily protein
At1g35780	0
At4g21750	0	ATML1__Homeobox-leucine zipper family protein / lipid-binding START domain-containing protein
At5g49180	0	Plant invertase/pectin methylesterase inhibitor superfamily
At1g75910	0	EXL4__extracellular lipase 4
At4g26760	0	MAP65-2__microtubule-associated protein 65-2
At1g77270	0
At2g17560	0	HMGB4_NFD04_NFD4__high mobility group B4
At5g64980	0
At3g56610	0
At4g32170	0	CYP96A2__cytochrome P450, family 96, subfamily A, polypeptide 2
At1g75388	0	CPuORF5__conserved peptide upstream open reading frame 5
At3g61240	0	DEA(D/H)-box RNA helicase family protein
At1g23650	0
At3g57510	0	ADPG1__Pectin lyase-like superfamily protein
At1g23600	0	Domain of unknown function DUF220
At2g31730	0	basic helix-loop-helix (bHLH) DNA-binding superfamily protein
At4g00950	0	MEE47__Protein of unknown function (DUF688)
At5g43270	0	SPL2__squamosa promoter binding protein-like 2
At3g12000	0	S-locus related protein SLR1, putative (S1)
At1g04220	0	KCS2__3-ketoacyl-CoA synthase 2
At1g11130	0	SCM_SRF9_SUB__Leucine-rich repeat protein kinase family protein
At3g20010	0	SNF2 domain-containing protein / helicase domain-containing protein / zinc finger protein-related
At3g21750	0	UGT71B1__UDP-glucosyl transferase 71B1
At2g15400	0	NRPE3B_RBP36B__DNA-directed RNA polymerase family protein
At2g21060	0	ATCSP4_ATGRP2B_GRP2B__glycine-rich protein 2B
At1g17140	0	ICR1_RIP1__interactor of constitutive active rops 1
At3g10890	0	Glycosyl hydrolase superfamily protein
At1g62030	0	Cysteine/Histidine-rich C1 domain family protein
At5g17700	0	MATE efflux family protein
At1g70270	0
At1g29510	0	SAUR67__SAUR-like auxin-responsive protein family
At1g69700	0	ATHVA22C_HVA22C__HVA22 homologue C
At3g20210	0	DELTA-VPE_DELTAVPE__delta vacuolar processing enzyme
At2g39870	0
At5g45940	0	AtNUDT11_AtNUDX11_NUDT11_NUDX11__nudix hydrolase homolog 11
At3g45930	0	Histone superfamily protein
At3g01530	0	ATMYB57_MYB57__myb domain protein 57
At2g39330	0	JAL23__jacalin-related lectin 23
At4g18980	0	AtS40-3__AtS40-3
At3g25050	0	XTH3__xyloglucan endotransglucosylase/hydrolase 3
At4g33130	0
At5g50800	0	AtSWEET13_SWEET13__Nodulin MtN3 family protein
At3g21040	0	transposable element gene
At5g41060	0	DHHC-type zinc finger family protein
At5g64850	0
At4g31840	0	AtENODL15_ENODL15__early nodulin-like protein 15
At5g15580	0	LNG1_TRM2__longifolia1
At5g41870	0	Pectin lyase-like superfamily protein
At1g55120	0	ATFRUCT5_AtcwINV3_FRUCT5__beta-fructofuranosidase 5
At4g27590	0	Heavy metal transport/detoxification superfamily protein
At5g43510	0	AtLURE1.2_CRP810_1.2_LURE1.2__Putative membrane lipoprotein
At3g55710	0	UDP-Glycosyltransferase superfamily protein
At5g34883	0	Protein of unknown function (DUF784)
At5g36670	0	RING/FYVE/PHD zinc finger superfamily protein
At2g01750	0	ATMAP70-3_MAP70-3__microtubule-associated proteins 70-3
At3g09980	0	ACIP1__Family of unknown function (DUF662)
At2g43550	0	Scorpion toxin-like knottin superfamily protein
At1g75940	0	ATA27_BGLU20__Glycosyl hydrolase superfamily protein
At3g50240	0	KICP-02__ATP binding microtubule motor family protein
At1g53070	0	Legume lectin family protein
At4g30500	0	Protein of unknown function (DUF788)
At1g06260	0	Cysteine proteinases superfamily protein
At1g36340	0	UBC31__ubiquitin-conjugating enzyme 31
At1g07370	0	ATPCNA1_PCNA1__proliferating cellular nuclear antigen 1
At5g48650	0	Nuclear transport factor 2 (NTF2) family protein with RNA binding (RRM-RBD-RNP motifs) domain
At5g24770	0	ATVSP2_VSP2__vegetative storage protein 2
At1g71890	0	ATSUC5_SUC5__Major facilitator superfamily protein
At2g39060	0	AtSWEET9_SWEET9__Nodulin MtN3 family protein
At4g16515	0	CLEL 6_GLV1_RGF6__
At2g11910	0
At4g35050	0	MSI3_NFC3__Transducin family protein / WD-40 repeat family protein
At2g17300	0
At5g25590	0	Protein of unknown function (DUF630 and DUF632)
At1g33940	0
At2g36050	0	ATOFP15_OFP15__ovate family protein 15
At5g59000	0	RING/FYVE/PHD zinc finger superfamily protein
At3g53310	0	AP2/B3-like transcriptional factor family protein
At1g75920	0	GDSL-like Lipase/Acylhydrolase superfamily protein
At3g54080	0	Concanavalin A-like lectin family protein
At5g42955	0	Protein of unknown function (DUF784)
At5g62690	0	TUB2__tubulin beta chain 2
At4g03070	0	AOP_AOP1_AOP1.1__2-oxoglutarate (2OG) and Fe(II)-dependent oxygenase superfamily protein
At1g63670	0	TRM12__Protein of unknown function (DUF3741)
At5g41600	0	BTI3_RTNLB4__VIRB2-interacting protein 3
At2g21130	0	Cyclophilin-like peptidyl-prolyl cis-trans isomerase family protein
At4g09740	0	AtGH9B14_GH9B14__glycosyl hydrolase 9B14
At2g16210	0	Transcriptional factor B3 family protein
At5g06050	0	Putative methyltransferase family protein
At3g51720	0	Plant protein of unknown function (DUF827)
At1g06760	0	winged-helix DNA-binding transcription factor family protein
At5g67150	0	HXXXD-type acyl-transferase family protein
At1g67750	0	Pectate lyase family protein
At2g02780	0	Leucine-rich repeat protein kinase family protein
At3g43270	0	Plant invertase/pectin methylesterase inhibitor superfamily
At1g10980	0	Lung seven transmembrane receptor family protein
At1g26820	0	RNS3__ribonuclease 3
At5g05040	0	Cystatin/monellin superfamily protein
At3g56090	0	ATFER3_FER3__ferritin 3
At5g67510	0	Translation protein SH3-like family protein
At2g17470	0	ALMT6_AtALMT6__Aluminium activated malate transporter family protein
264015_at	0
At2g20240	0	TRM17__Protein of unknown function (DUF3741)
At3g28560	0	BCS1 AAA-type ATPase
At5g65440	0
At5g55660	0	DEK domain-containing chromatin associated protein
At4g26660	0
At4g18540	0
At2g17730	0	NIP2__NEP-interacting protein 2
At3g13640	0	ABCE1_ATRLI1_RLI1__RNAse l inhibitor protein 1
At5g20540	0	ATBRXL4_BRX-LIKE4_BRXL4__BREVIS RADIX-like 4
At2g20595	0
At1g61450	0
At5g37890	0	Protein with RING/U-box and TRAF-like domains
At5g55520	0
At3g14380	0	Uncharacterised protein family (UPF0497)
At1g23205	0	Plant invertase/pectin methylesterase inhibitor superfamily protein
At2g21655	0	Protein of unknown function (DUF784)
At4g04460	0	Saposin-like aspartyl protease family protein
At2g42540	0	COR15_COR15A__cold-regulated 15a
At3g09000	0	BPP2__proline-rich family protein
At5g36710	0
At5g51950	0	Glucose-methanol-choline (GMC) oxidoreductase family protein
At2g03740	0	late embryogenesis abundant domain-containing protein / LEA domain-containing protein
At1g28290	0	AGP31__arabinogalactan protein 31
At5g06670	0	P-loop containing nucleoside triphosphate hydrolases superfamily protein
At5g12440	0	CCCH-type zinc fingerfamily protein with RNA-binding domain
At3g22310	0	ATRH9_PMH1__putative mitochondrial RNA helicase 1
At1g71050	0	HIPP20__Heavy metal transport/detoxification superfamily protein
At1g07660	0	Histone superfamily protein
At1g20590	0	Cyclin family protein
At5g48480	0	Lactoylglutathione lyase / glyoxalase I family protein
At2g34810	0	FAD-binding Berberine family protein
At2g23700	0	Protein of unknown function, DUF547
At1g26540	0	Agenet domain-containing protein
At2g25060	0	AtENODL14_ENODL14__early nodulin-like protein 14
At3g07610	0	IBM1__Transcription factor jumonji (jmjC) domain-containing protein
At1g32180	0	ATCSLD6_CSLD6__cellulose synthase-like D6
At1g54020	0	GDSL-like Lipase/Acylhydrolase superfamily protein
At2g07783	0
At3g44250	0	CYP71B38__cytochrome P450, family 71, subfamily B, polypeptide 38
At5g11360	0	Interleukin-1 receptor-associated kinase 4 protein
At3g05790	0	LON4__lon protease 4
At1g03710	0	Cystatin/monellin superfamily protein
At1g06960	0	RNA-binding (RRM/RBD/RNP motifs) family protein
At3g22520	0
At4g27330	0	NZZ_SPL__sporocyteless (SPL)
At3g19570	0	QWRF1_SCO3__Family of unknown function (DUF566)
At5g17030	0	UGT78D3__UDP-glucosyl transferase 78D3
At1g75840	0	ARAC5_ATGP3_ATROP4_ROP4__RAC-like GTP binding protein 5
At4g25240	0	SKS1__SKU5 similar 1
At5g27220	0	Frigida-like protein
At1g68060	0	ATMAP70-1_MAP70-1__microtubule-associated proteins 70-1
At1g70830	0	MLP28__MLP-like protein 28
At5g37300	0	WSD1__O-acyltransferase (WSD1-like) family protein
At1g03830	0	guanylate-binding family protein
At1g04310	0	ERS2__ethylene response sensor 2
At3g14520	0	Terpenoid cyclases/Protein prenyltransferases superfamily protein
At5g10800	0	RNA recognition motif (RRM)-containing protein
At3g52920	0	Family of unknown function (DUF662)
At4g29700	0	Alkaline-phosphatase-like family protein
At1g04260	0	MPI7_MPIP7_PRA1.D__CAMV movement protein interacting protein 7
At4g13210	0	Pectin lyase-like superfamily protein
